# Supplementary material for: Social rank overrides environmental and community fluctuations in determining meat access by female chimpanzees in the Taï National Park, Côte d’Ivoire
Source: PeerJ. 2020 Jan 22;8:e8283. doi: 10.7717/peerj.8283 (PMC6982416; doi:10.7717/peerj.8283)
Supplement: Supplemental Information 4 — The data to test if high-ranking females have increased access to meat compared to subordinates given both are at a meat eating event. [file peerj-08-8283-s004.csv]

group	status	EventID	year	month	day	who	estrus	meat	is.lac	rank	sex	age	nfemales	nmales	communitysize	FAI
north	correct_old	1-north	1987	8	31	BRU-north	0	1	0	NA	M	13226	4	8	68	0.242119847592657
north	correct_old	1-north	1987	8	31	KEN-north	0	0	0	NA	M	6651	4	8	68	0.242119847592657
north	correct_old	1-north	1987	8	31	FAL-north	0	1	0	NA	M	14321	4	8	68	0.242119847592657
north	correct_old	1-north	1987	8	31	SNO-north	0	0	0	NA	M	6286	4	8	68	0.242119847592657
north	correct_old	1-north	1987	8	31	DAR-north	0	0	0	NA	M	6651	4	8	68	0.242119847592657
north	correct_old	1-north	1987	8	31	ROU-north	0	1	0	NA	M	7747	4	8	68	0.242119847592657
north	correct_old	1-north	1987	8	31	OND-north	0	0	0	high	F	12130	4	8	68	0.242119847592657
north	correct_old	1-north	1987	8	31	MAC-north	0	1	0	NA	M	8477	4	8	68	0.242119847592657
north	correct_old	1-north	1987	8	31	ALI-north	0	1	0	NA	M	2999	4	8	68	0.242119847592657
north	correct_old	1-north	1987	8	31	POU-north	0	1	1	high	F	5190	4	8	68	0.242119847592657
north	correct_old	1-north	1987	8	31	CHA-north	1	1	0	high	F	16513	4	8	68	0.242119847592657
north	correct_old	1-north	1987	8	31	SAL-north	0	1	0	high	F	10669	4	8	68	0.242119847592657
north	correct_old	1-north	1987	8	31	SAR-north	0	0	0	NA	M	2633	4	8	68	0.242119847592657
north	correct_old	1-north	1987	8	31	IMI-north	0	1	0	NA	F	4094	4	8	68	0.242119847592657
north	correct_old	1-north	1987	8	31	ULY-north	0	0	0	NA	M	7747	4	8	68	0.242119847592657
north	correct_old	2-north	1987	9	10	FAL-north	0	0	0	NA	M	14331	6	6	68	0.285023355793477
north	correct_old	2-north	1987	9	10	OND-north	0	1	0	high	F	12140	6	6	68	0.285023355793477
north	correct_old	2-north	1987	9	10	ALI-north	0	1	0	NA	M	3009	6	6	68	0.285023355793477
north	correct_old	2-north	1987	9	10	ROU-north	0	0	0	NA	M	7757	6	6	68	0.285023355793477
north	correct_old	2-north	1987	9	10	ULY-north	0	0	0	NA	M	7757	6	6	68	0.285023355793477
north	correct_old	2-north	1987	9	10	MAC-north	0	1	0	NA	M	8487	6	6	68	0.285023355793477
north	correct_old	2-north	1987	9	10	SNO-north	0	0	0	NA	M	6296	6	6	68	0.285023355793477
north	correct_old	2-north	1987	9	10	LOU-north	0	0	1	high	F	5565	6	6	68	0.285023355793477
north	correct_old	2-north	1987	9	10	GAU-north	0	0	0	high	F	5931	6	6	68	0.285023355793477
north	correct_old	2-north	1987	9	10	BRU-north	0	1	0	NA	M	13236	6	6	68	0.285023355793477
north	correct_old	2-north	1987	9	10	SAL-north	1	1	0	high	F	10679	6	6	68	0.285023355793477
north	correct_old	2-north	1987	9	10	CHA-north	1	1	0	high	F	16523	6	6	68	0.285023355793477
north	correct_old	2-north	1987	9	10	SAR-north	0	1	0	NA	M	2643	6	6	68	0.285023355793477
north	correct_old	2-north	1987	9	10	NOV-north	0	1	0	high	F	7757	6	6	68	0.285023355793477
north	correct_old	2-north	1987	9	10	NEG-north	0	1	0	NA	M	1913	6	6	68	0.285023355793477
north	correct_old	3-north	1987	9	15	FAL-north	0	1	0	NA	M	14336	8	6	68	0.285023355793477
north	correct_old	3-north	1987	9	15	SNO-north	0	1	0	NA	M	6301	8	6	68	0.285023355793477
north	correct_old	3-north	1987	9	15	DAR-north	0	1	0	NA	M	6666	8	6	68	0.285023355793477
north	correct_old	3-north	1987	9	15	MAC-north	0	1	0	NA	M	8492	8	6	68	0.285023355793477
north	correct_old	3-north	1987	9	15	ULY-north	0	1	0	NA	M	7762	8	6	68	0.285023355793477
north	correct_old	3-north	1987	9	15	ROU-north	0	1	0	NA	M	7762	8	6	68	0.285023355793477
north	correct_old	3-north	1987	9	15	SAL-north	1	1	0	high	F	10684	8	6	68	0.285023355793477
north	correct_old	3-north	1987	9	15	ELL-north	0	1	0	high	F	11414	8	6	68	0.285023355793477
north	correct_old	3-north	1987	9	15	GIT-north	0	1	0	middle	F	13971	8	6	68	0.285023355793477
north	correct_old	3-north	1987	9	15	SAR-north	0	1	0	NA	M	2648	8	6	68	0.285023355793477
north	correct_old	3-north	1987	9	15	ALI-north	0	1	0	NA	M	3014	8	6	68	0.285023355793477
north	correct_old	3-north	1987	9	15	VOG-north	0	1	0	high	F	7031	8	6	68	0.285023355793477
north	correct_old	3-north	1987	9	15	NOV-north	0	1	0	high	F	7762	8	6	68	0.285023355793477
north	correct_old	3-north	1987	9	15	HER-north	0	1	1	middle	F	8127	8	6	68	0.285023355793477
north	correct_old	3-north	1987	9	15	GIP-north	0	1	0	NA	M	2526	8	6	68	0.285023355793477
north	correct_old	3-north	1987	9	15	HAS-north	0	1	0	NA	M	3440	8	6	68	0.285023355793477
north	correct_old	3-north	1987	9	15	MYS-north	0	1	0	NA	F	4475	8	6	68	0.285023355793477
north	correct_old	3-north	1987	9	15	FAN-north	0	1	1	middle	F	6666	8	6	68	0.285023355793477
north	correct_old	3-north	1987	9	15	CHA-north	0	1	0	high	F	16528	8	6	68	0.285023355793477
north	correct_old	3-north	1987	9	15	ERO-north	0	1	0	NA	M	1918	8	6	68	0.285023355793477
north	correct_old	3-north	1987	9	15	FIT-north	0	1	0	NA	M	4475	8	6	68	0.285023355793477
north	correct_old	4-north	1987	9	19	FAL-north	0	0	0	NA	M	14340	15	6	68	0.285023355793477
north	correct_old	4-north	1987	9	19	SAL-north	1	0	0	high	F	10688	15	6	68	0.285023355793477
north	correct_old	4-north	1987	9	19	OND-north	0	1	0	high	F	12149	15	6	68	0.285023355793477
north	correct_old	4-north	1987	9	19	BRU-north	0	1	0	NA	M	13245	15	6	68	0.285023355793477
north	correct_old	4-north	1987	9	19	DAR-north	0	1	0	NA	M	6670	15	6	68	0.285023355793477
north	correct_old	4-north	1987	9	19	MAC-north	0	1	0	NA	M	8496	15	6	68	0.285023355793477
north	correct_old	4-north	1987	9	19	GIT-north	0	1	0	middle	F	13975	15	6	68	0.285023355793477
north	correct_old	4-north	1987	9	19	ROU-north	0	1	0	NA	M	7766	15	6	68	0.285023355793477
north	correct_old	4-north	1987	9	19	SNO-north	0	1	0	NA	M	6305	15	6	68	0.285023355793477
north	correct_old	4-north	1987	9	19	SAP-north	0	0	0	low	F	6305	15	6	68	0.285023355793477
north	correct_old	4-north	1987	9	19	MAL-north	0	1	0	middle	F	5940	15	6	68	0.285023355793477
north	correct_old	4-north	1987	9	19	CHA-north	0	1	0	high	F	16532	15	6	68	0.285023355793477
north	correct_old	4-north	1987	9	19	XER-north	0	0	0	low	F	6305	15	6	68	0.285023355793477
north	correct_old	4-north	1987	9	19	GAU-north	0	1	0	high	F	5940	15	6	68	0.285023355793477
north	correct_old	4-north	1987	9	19	RUB-north	0	1	0	NA	F	1527	15	6	68	0.285023355793477
north	correct_old	4-north	1987	9	19	FIT-north	0	1	0	NA	M	4479	15	6	68	0.285023355793477
north	correct_old	4-north	1987	9	19	VOG-north	0	1	0	high	F	7035	15	6	68	0.285023355793477
north	correct_old	4-north	1987	9	19	LOU-north	0	1	1	high	F	5574	15	6	68	0.285023355793477
north	correct_old	4-north	1987	9	19	BIJ-north	1	0	0	NA	F	4479	15	6	68	0.285023355793477
north	correct_old	4-north	1987	9	19	GOM-north	0	1	1	middle	F	5209	15	6	68	0.285023355793477
north	correct_old	4-north	1987	9	19	KIR-north	0	1	1	middle	F	6670	15	6	68	0.285023355793477
north	correct_old	4-north	1987	9	19	ELL-north	0	1	0	high	F	11418	15	6	68	0.285023355793477
north	correct_old	4-north	1987	9	19	LOL-north	0	1	1	low	F	12514	15	6	68	0.285023355793477
north	correct_old	4-north	1987	9	19	NOV-north	0	1	0	high	F	7766	15	6	68	0.285023355793477
north	correct_old	4-north	1987	9	19	NEG-north	0	1	0	NA	M	1922	15	6	68	0.285023355793477
north	correct_old	4-north	1987	9	19	GER-north	0	1	0	NA	M	1557	15	6	68	0.285023355793477
north	correct_old	4-north	1987	9	19	CHO-north	0	1	0	NA	F	2379	15	6	68	0.285023355793477
north	correct_old	5-north	1987	9	21	MAC-north	0	1	0	NA	M	8498	3	3	68	0.285023355793477
north	correct_old	5-north	1987	9	21	BRU-north	0	1	0	NA	M	13247	3	3	68	0.285023355793477
north	correct_old	5-north	1987	9	21	ROU-north	0	1	0	NA	M	7768	3	3	68	0.285023355793477
north	correct_old	5-north	1987	9	21	GIT-north	0	1	0	middle	F	13977	3	3	68	0.285023355793477
north	correct_old	5-north	1987	9	21	POU-north	0	1	1	high	F	5211	3	3	68	0.285023355793477
north	correct_old	5-north	1987	9	21	MYS-north	1	1	0	NA	F	4481	3	3	68	0.285023355793477
north	correct_old	5-north	1987	9	21	BIJ-north	1	1	0	NA	F	4481	3	3	68	0.285023355793477
north	correct_old	5-north	1987	9	21	LOL-north	0	1	1	low	F	12516	3	3	68	0.285023355793477
north	correct_old	5-north	1987	9	21	GIP-north	0	1	0	NA	M	2532	3	3	68	0.285023355793477
north	correct_old	5-north	1987	9	21	GOY-north	0	1	0	NA	F	798	3	3	68	0.285023355793477
north	correct_old	6-north	1987	9	21	ULY-north	0	1	0	NA	M	7768	9	6	68	0.285023355793477
north	correct_old	6-north	1987	9	21	MAC-north	0	0	0	NA	M	8498	9	6	68	0.285023355793477
north	correct_old	6-north	1987	9	21	ROU-north	0	1	0	NA	M	7768	9	6	68	0.285023355793477
north	correct_old	6-north	1987	9	21	SNO-north	0	1	0	NA	M	6307	9	6	68	0.285023355793477
north	correct_old	6-north	1987	9	21	KEN-north	0	0	0	NA	M	6672	9	6	68	0.285023355793477
north	correct_old	6-north	1987	9	21	POU-north	0	1	1	high	F	5211	9	6	68	0.285023355793477
north	correct_old	6-north	1987	9	21	MAL-north	1	1	0	middle	F	5942	9	6	68	0.285023355793477
north	correct_old	6-north	1987	9	21	ELL-north	0	0	0	high	F	11420	9	6	68	0.285023355793477
north	correct_old	6-north	1987	9	21	DAR-north	0	1	0	NA	M	6672	9	6	68	0.285023355793477
north	correct_old	6-north	1987	9	21	ALI-north	0	0	0	NA	M	3020	9	6	68	0.285023355793477
north	correct_old	6-north	1987	9	21	FIT-north	0	0	0	NA	M	4481	9	6	68	0.285023355793477
north	correct_old	6-north	1987	9	21	POK-north	0	0	0	low	F	11420	9	6	68	0.285023355793477
north	correct_old	6-north	1987	9	21	FAN-north	0	1	1	middle	F	6672	9	6	68	0.285023355793477
north	correct_old	6-north	1987	9	21	GAL-north	0	1	0	middle	F	8498	9	6	68	0.285023355793477
north	correct_old	6-north	1987	9	21	HER-north	0	1	1	middle	F	8133	9	6	68	0.285023355793477
north	correct_old	6-north	1987	9	21	RIC-north	0	1	0	middle	F	8864	9	6	68	0.285023355793477
north	correct_old	6-north	1987	9	21	ERO-north	0	1	0	NA	M	1924	9	6	68	0.285023355793477
north	correct_old	6-north	1987	9	21	MAE-north	0	1	0	low	F	5942	9	6	68	0.285023355793477
north	correct_old	6-north	1987	9	21	HAS-north	0	1	0	NA	M	3446	9	6	68	0.285023355793477
north	correct_old	7-north	1987	9	23	SNO-north	0	0	0	NA	M	6309	8	7	68	0.285023355793477
north	correct_old	7-north	1987	9	23	ULY-north	0	1	0	NA	M	7770	8	7	68	0.285023355793477
north	correct_old	7-north	1987	9	23	MAC-north	0	1	0	NA	M	8500	8	7	68	0.285023355793477
north	correct_old	7-north	1987	9	23	KEN-north	0	1	0	NA	M	6674	8	7	68	0.285023355793477
north	correct_old	7-north	1987	9	23	OND-north	0	0	0	high	F	12153	8	7	68	0.285023355793477
north	correct_old	7-north	1987	9	23	ALI-north	0	1	0	NA	M	3022	8	7	68	0.285023355793477
north	correct_old	7-north	1987	9	23	CHA-north	0	1	0	high	F	16536	8	7	68	0.285023355793477
north	correct_old	7-north	1987	9	23	ROU-north	0	1	0	NA	M	7770	8	7	68	0.285023355793477
north	correct_old	7-north	1987	9	23	BRU-north	0	1	0	NA	M	13249	8	7	68	0.285023355793477
north	correct_old	7-north	1987	9	23	DAR-north	0	0	0	NA	M	6674	8	7	68	0.285023355793477
north	correct_old	7-north	1987	9	23	GIT-north	0	0	0	middle	F	13979	8	7	68	0.285023355793477
north	correct_old	7-north	1987	9	23	TOS-north	0	1	0	high	F	11422	8	7	68	0.285023355793477
north	correct_old	7-north	1987	9	23	SAL-north	1	1	0	high	F	10692	8	7	68	0.285023355793477
north	correct_old	7-north	1987	9	23	SAR-north	0	1	0	NA	M	2656	8	7	68	0.285023355793477
north	correct_old	7-north	1987	9	23	SAP-north	0	1	0	low	F	6309	8	7	68	0.285023355793477
north	correct_old	7-north	1987	9	23	KIR-north	0	0	1	middle	F	6674	8	7	68	0.285023355793477
north	correct_old	7-north	1987	9	23	LOL-north	0	1	1	low	F	12518	8	7	68	0.285023355793477
north	correct_old	7-north	1987	9	23	TAR-north	0	1	0	NA	M	1316	8	7	68	0.285023355793477
north	correct_old	7-north	1987	9	23	TIN-north	0	1	0	NA	F	3022	8	7	68	0.285023355793477
north	correct_old	8-north	1987	9	25	KEN-north	0	0	0	NA	M	6676	11	7	68	0.285023355793477
north	correct_old	8-north	1987	9	25	ULY-north	0	1	0	NA	M	7772	11	7	68	0.285023355793477
north	correct_old	8-north	1987	9	25	ALI-north	0	1	0	NA	M	3024	11	7	68	0.285023355793477
north	correct_old	8-north	1987	9	25	DAR-north	0	0	0	NA	M	6676	11	7	68	0.285023355793477
north	correct_old	8-north	1987	9	25	BRU-north	0	1	0	NA	M	13251	11	7	68	0.285023355793477
north	correct_old	8-north	1987	9	25	MAC-north	0	1	0	NA	M	8502	11	7	68	0.285023355793477
north	correct_old	8-north	1987	9	25	ROU-north	0	1	0	NA	M	7772	11	7	68	0.285023355793477
north	correct_old	8-north	1987	9	25	HER-north	0	1	1	middle	F	8137	11	7	68	0.285023355793477
north	correct_old	8-north	1987	9	25	GIT-north	0	1	0	middle	F	13981	11	7	68	0.285023355793477
north	correct_old	8-north	1987	9	25	SNO-north	0	1	0	NA	M	6311	11	7	68	0.285023355793477
north	correct_old	8-north	1987	9	25	ERO-north	0	0	0	NA	M	1928	11	7	68	0.285023355793477
north	correct_old	8-north	1987	9	25	LOU-north	0	1	1	high	F	5580	11	7	68	0.285023355793477
north	correct_old	8-north	1987	9	25	GAU-north	0	0	0	high	F	5946	11	7	68	0.285023355793477
north	correct_old	8-north	1987	9	25	CHA-north	0	1	0	high	F	16538	11	7	68	0.285023355793477
north	correct_old	8-north	1987	9	25	POU-north	0	1	1	high	F	5215	11	7	68	0.285023355793477
north	correct_old	8-north	1987	9	25	SAP-north	0	1	0	low	F	6311	11	7	68	0.285023355793477
north	correct_old	8-north	1987	9	25	MAL-north	0	1	0	middle	F	5946	11	7	68	0.285023355793477
north	correct_old	8-north	1987	9	25	NOV-north	0	1	0	high	F	7772	11	7	68	0.285023355793477
north	correct_old	8-north	1987	9	25	ZOE-north	0	1	0	low	F	8137	11	7	68	0.285023355793477
north	correct_old	8-north	1987	9	25	XER-north	0	1	0	low	F	6311	11	7	68	0.285023355793477
north	correct_old	9-north	1987	9	29	MAC-north	0	1	0	NA	M	8506	11	7	68	0.285023355793477
north	correct_old	9-north	1987	9	29	ULY-north	0	1	0	NA	M	7776	11	7	68	0.285023355793477
north	correct_old	9-north	1987	9	29	DAR-north	0	1	0	NA	M	6680	11	7	68	0.285023355793477
north	correct_old	9-north	1987	9	29	SNO-north	0	1	0	NA	M	6315	11	7	68	0.285023355793477
north	correct_old	9-north	1987	9	29	MYS-north	1	1	0	NA	F	4489	11	7	68	0.285023355793477
north	correct_old	9-north	1987	9	29	ROU-north	0	1	0	NA	M	7776	11	7	68	0.285023355793477
north	correct_old	9-north	1987	9	29	KEN-north	0	1	0	NA	M	6680	11	7	68	0.285023355793477
north	correct_old	9-north	1987	9	29	SAP-north	0	1	0	low	F	6315	11	7	68	0.285023355793477
north	correct_old	9-north	1987	9	29	POU-north	0	1	1	high	F	5219	11	7	68	0.285023355793477
north	correct_old	9-north	1987	9	29	BRU-north	0	1	0	NA	M	13255	11	7	68	0.285023355793477
north	correct_old	9-north	1987	9	29	MOM-north	0	0	1	middle	F	6680	11	7	68	0.285023355793477
north	correct_old	9-north	1987	9	29	ALI-north	0	1	0	NA	M	3028	11	7	68	0.285023355793477
north	correct_old	9-north	1987	9	29	CHA-north	1	1	0	high	F	16542	11	7	68	0.285023355793477
north	correct_old	9-north	1987	9	29	OND-north	0	1	0	high	F	12159	11	7	68	0.285023355793477
north	correct_old	9-north	1987	9	29	SAL-north	1	1	0	high	F	10698	11	7	68	0.285023355793477
north	correct_old	9-north	1987	9	29	LOU-north	0	0	1	high	F	5584	11	7	68	0.285023355793477
north	correct_old	9-north	1987	9	29	GAU-north	0	0	0	high	F	5950	11	7	68	0.285023355793477
north	correct_old	9-north	1987	9	29	GIT-north	0	1	0	middle	F	13985	11	7	68	0.285023355793477
north	correct_old	9-north	1987	9	29	CHO-north	0	1	0	NA	F	2389	11	7	68	0.285023355793477
north	correct_old	9-north	1987	9	29	GOS-north	0	0	0	NA	F	568	11	7	68	0.285023355793477
north	correct_old	9-north	1987	9	29	SAR-north	0	1	0	NA	M	2662	11	7	68	0.285023355793477
north	correct_old	9-north	1987	9	29	BIJ-north	0	0	0	NA	F	4489	11	7	68	0.285023355793477
north	correct_old	9-north	1987	9	29	ORE-north	0	1	0	NA	F	1445	11	7	68	0.285023355793477
north	correct_old	9-north	1987	9	29	MAL-north	0	1	0	middle	F	5950	11	7	68	0.285023355793477
north	correct_old	9-north	1987	9	29	TOS-north	0	1	0	high	F	11428	11	7	68	0.285023355793477
north	correct_old	9-north	1987	9	29	TAR-north	0	1	0	NA	M	1322	11	7	68	0.285023355793477
north	correct_old	10-north	1987	9	30	KEN-north	0	0	0	NA	M	6681	13	7	68	0.285023355793477
north	correct_old	10-north	1987	9	30	DAR-north	0	1	0	NA	M	6681	13	7	68	0.285023355793477
north	correct_old	10-north	1987	9	30	SNO-north	0	1	0	NA	M	6316	13	7	68	0.285023355793477
north	correct_old	10-north	1987	9	30	ULY-north	0	1	0	NA	M	7777	13	7	68	0.285023355793477
north	correct_old	10-north	1987	9	30	ROU-north	0	1	0	NA	M	7777	13	7	68	0.285023355793477
north	correct_old	10-north	1987	9	30	MAC-north	0	0	0	NA	M	8507	13	7	68	0.285023355793477
north	correct_old	10-north	1987	9	30	FIT-north	0	1	0	NA	M	4490	13	7	68	0.285023355793477
north	correct_old	10-north	1987	9	30	GIT-north	0	1	0	middle	F	13986	13	7	68	0.285023355793477
north	correct_old	10-north	1987	9	30	SAL-north	1	1	0	high	F	10699	13	7	68	0.285023355793477
north	correct_old	10-north	1987	9	30	SAR-north	0	1	0	NA	M	2663	13	7	68	0.285023355793477
north	correct_old	10-north	1987	9	30	BRU-north	0	1	0	NA	M	13256	13	7	68	0.285023355793477
north	correct_old	10-north	1987	9	30	OND-north	0	1	0	high	F	12160	13	7	68	0.285023355793477
north	correct_old	10-north	1987	9	30	ALI-north	0	1	0	NA	M	3029	13	7	68	0.285023355793477
north	correct_old	10-north	1987	9	30	TOS-north	0	1	0	high	F	11429	13	7	68	0.285023355793477
north	correct_old	10-north	1987	9	30	KIR-north	0	1	1	middle	F	6681	13	7	68	0.285023355793477
north	correct_old	10-north	1987	9	30	SAP-north	0	1	0	low	F	6316	13	7	68	0.285023355793477
north	correct_old	10-north	1987	9	30	IMI-north	0	0	0	NA	F	4124	13	7	68	0.285023355793477
north	correct_old	10-north	1987	9	30	CHA-north	1	1	0	high	F	16543	13	7	68	0.285023355793477
north	correct_old	10-north	1987	9	30	ZOE-north	0	1	0	low	F	8142	13	7	68	0.285023355793477
north	correct_old	10-north	1987	9	30	TIN-north	0	1	0	NA	F	3029	13	7	68	0.285023355793477
north	correct_old	10-north	1987	9	30	ORE-north	0	1	0	NA	F	1446	13	7	68	0.285023355793477
north	correct_old	10-north	1987	9	30	ZIR-north	0	0	0	NA	F	3394	13	7	68	0.285023355793477
north	correct_old	10-north	1987	9	30	CHO-north	0	1	0	NA	F	2390	13	7	68	0.285023355793477
north	correct_old	10-north	1987	9	30	GOM-north	0	1	1	middle	F	5220	13	7	68	0.285023355793477
north	correct_old	10-north	1987	9	30	GAU-north	0	1	0	high	F	5951	13	7	68	0.285023355793477
north	correct_old	10-north	1987	9	30	GIP-north	0	1	0	NA	M	2541	13	7	68	0.285023355793477
north	correct_old	10-north	1987	9	30	LOL-north	0	1	1	low	F	12525	13	7	68	0.285023355793477
north	correct_old	10-north	1987	9	30	BON-north	0	0	0	NA	F	3759	13	7	68	0.285023355793477
north	correct_old	10-north	1987	9	30	XER-north	0	1	0	low	F	6316	13	7	68	0.285023355793477
north	correct_old	10-north	1987	9	30	PER-north	0	1	0	NA	F	4124	13	7	68	0.285023355793477
north	correct_old	10-north	1987	9	30	MOM-north	0	1	1	middle	F	6681	13	7	68	0.285023355793477
north	correct_old	10-north	1987	9	30	MOL-north	0	1	0	NA	M	2053	13	7	68	0.285023355793477
north	correct_old	10-north	1987	9	30	GOY-north	0	1	0	NA	F	807	13	7	68	0.285023355793477
north	correct_old	11-north	1987	10	2	MAL-north	0	1	0	middle	F	5953	13	7	68	0.350900466312912
north	correct_old	11-north	1987	10	2	MAC-north	0	1	0	NA	M	8509	13	7	68	0.350900466312912
north	correct_old	11-north	1987	10	2	ROU-north	0	1	0	NA	M	7779	13	7	68	0.350900466312912
north	correct_old	11-north	1987	10	2	KEN-north	0	1	0	NA	M	6683	13	7	68	0.350900466312912
north	correct_old	11-north	1987	10	2	SNO-north	0	1	0	NA	M	6318	13	7	68	0.350900466312912
north	correct_old	11-north	1987	10	2	ULY-north	0	1	0	NA	M	7779	13	7	68	0.350900466312912
north	correct_old	11-north	1987	10	2	HER-north	0	1	1	middle	F	8144	13	7	68	0.350900466312912
north	correct_old	11-north	1987	10	2	POU-north	0	1	1	high	F	5222	13	7	68	0.350900466312912
north	correct_old	11-north	1987	10	2	DAR-north	0	0	0	NA	M	6683	13	7	68	0.350900466312912
north	correct_old	11-north	1987	10	2	NOV-north	0	1	0	high	F	7779	13	7	68	0.350900466312912
north	correct_old	11-north	1987	10	2	SAL-north	1	0	0	high	F	10701	13	7	68	0.350900466312912
north	correct_old	11-north	1987	10	2	BIJ-north	0	1	0	NA	F	4492	13	7	68	0.350900466312912
north	correct_old	11-north	1987	10	2	MYS-north	1	0	0	NA	F	4492	13	7	68	0.350900466312912
north	correct_old	11-north	1987	10	2	ALI-north	0	1	0	NA	M	3031	13	7	68	0.350900466312912
north	correct_old	11-north	1987	10	2	BRU-north	0	1	0	NA	M	13258	13	7	68	0.350900466312912
north	correct_old	11-north	1987	10	2	CHA-north	1	1	0	high	F	16545	13	7	68	0.350900466312912
north	correct_old	11-north	1987	10	2	GIT-north	0	1	0	middle	F	13988	13	7	68	0.350900466312912
north	correct_old	11-north	1987	10	2	OND-north	0	0	0	high	F	12162	13	7	68	0.350900466312912
north	correct_old	11-north	1987	10	2	SAR-north	0	1	0	NA	M	2665	13	7	68	0.350900466312912
north	correct_old	11-north	1987	10	2	SAP-north	0	1	0	low	F	6318	13	7	68	0.350900466312912
north	correct_old	11-north	1987	10	2	GIP-north	0	1	0	NA	M	2543	13	7	68	0.350900466312912
north	correct_old	11-north	1987	10	2	MAE-north	0	0	0	low	F	5953	13	7	68	0.350900466312912
north	correct_old	11-north	1987	10	2	GAU-north	0	0	0	high	F	5953	13	7	68	0.350900466312912
north	correct_old	11-north	1987	10	2	LOU-north	0	0	1	high	F	5587	13	7	68	0.350900466312912
north	correct_old	11-north	1987	10	2	GOM-north	0	0	1	middle	F	5222	13	7	68	0.350900466312912
north	correct_old	12-north	1987	10	4	DAR-north	0	0	0	NA	M	6685	14	7	68	0.350900466312912
north	correct_old	12-north	1987	10	4	ROU-north	0	1	0	NA	M	7781	14	7	68	0.350900466312912
north	correct_old	12-north	1987	10	4	MAC-north	0	1	0	NA	M	8511	14	7	68	0.350900466312912
north	correct_old	12-north	1987	10	4	ULY-north	0	0	0	NA	M	7781	14	7	68	0.350900466312912
north	correct_old	12-north	1987	10	4	SNO-north	0	1	0	NA	M	6320	14	7	68	0.350900466312912
north	correct_old	12-north	1987	10	4	MYS-north	1	0	0	NA	F	4494	14	7	68	0.350900466312912
north	correct_old	12-north	1987	10	4	VOG-north	0	0	0	high	F	7050	14	7	68	0.350900466312912
north	correct_old	12-north	1987	10	4	FIT-north	0	0	0	NA	M	4494	14	7	68	0.350900466312912
north	correct_old	12-north	1987	10	4	KEN-north	0	0	0	NA	M	6685	14	7	68	0.350900466312912
north	correct_old	12-north	1987	10	4	CHA-north	1	1	0	high	F	16547	14	7	68	0.350900466312912
north	correct_old	12-north	1987	10	4	ALI-north	0	1	0	NA	M	3033	14	7	68	0.350900466312912
north	correct_old	12-north	1987	10	4	TOS-north	0	1	0	high	F	11433	14	7	68	0.350900466312912
north	correct_old	12-north	1987	10	4	GIT-north	0	1	0	middle	F	13990	14	7	68	0.350900466312912
north	correct_old	12-north	1987	10	4	BRU-north	0	1	0	NA	M	13260	14	7	68	0.350900466312912
north	correct_old	12-north	1987	10	4	GAU-north	0	1	0	high	F	5955	14	7	68	0.350900466312912
north	correct_old	12-north	1987	10	4	OND-north	0	1	0	high	F	12164	14	7	68	0.350900466312912
north	correct_old	12-north	1987	10	4	ELL-north	0	0	0	high	F	11433	14	7	68	0.350900466312912
north	correct_old	12-north	1987	10	4	LOU-north	0	1	1	high	F	5589	14	7	68	0.350900466312912
north	correct_old	12-north	1987	10	4	SAP-north	0	1	0	low	F	6320	14	7	68	0.350900466312912
north	correct_old	12-north	1987	10	4	ZOE-north	0	0	0	low	F	8146	14	7	68	0.350900466312912
north	correct_old	12-north	1987	10	4	SAL-north	0	0	0	high	F	10703	14	7	68	0.350900466312912
north	correct_old	12-north	1987	10	4	NOV-north	0	0	0	high	F	7781	14	7	68	0.350900466312912
north	correct_old	12-north	1987	10	4	HER-north	0	0	1	middle	F	8146	14	7	68	0.350900466312912
north	correct_old	12-north	1987	10	4	POU-north	0	1	1	high	F	5224	14	7	68	0.350900466312912
north	correct_old	12-north	1987	10	4	PER-north	0	0	0	NA	F	4128	14	7	68	0.350900466312912
north	correct_old	13-north	1987	10	6	SNO-north	0	1	0	NA	M	6322	4	6	68	0.350900466312912
north	correct_old	13-north	1987	10	6	KEN-north	0	1	0	NA	M	6687	4	6	68	0.350900466312912
north	correct_old	13-north	1987	10	6	ROU-north	0	1	0	NA	M	7783	4	6	68	0.350900466312912
north	correct_old	13-north	1987	10	6	BRU-north	0	1	0	NA	M	13262	4	6	68	0.350900466312912
north	correct_old	13-north	1987	10	6	DAR-north	0	0	0	NA	M	6687	4	6	68	0.350900466312912
north	correct_old	13-north	1987	10	6	ALI-north	0	1	0	NA	M	3035	4	6	68	0.350900466312912
north	correct_old	13-north	1987	10	6	LOU-north	0	1	1	high	F	5591	4	6	68	0.350900466312912
north	correct_old	13-north	1987	10	6	GOM-north	0	0	1	middle	F	5226	4	6	68	0.350900466312912
north	correct_old	13-north	1987	10	6	MAC-north	0	0	0	NA	M	8513	4	6	68	0.350900466312912
north	correct_old	13-north	1987	10	6	GIT-north	0	0	0	middle	F	13992	4	6	68	0.350900466312912
north	correct_old	13-north	1987	10	6	ELL-north	0	0	0	high	F	11435	4	6	68	0.350900466312912
north	correct_old	13-north	1987	10	6	FIT-north	0	0	0	NA	M	4496	4	6	68	0.350900466312912
north	correct_old	14-north	1987	10	7	ULY-north	0	0	0	NA	M	7784	8	7	68	0.350900466312912
north	correct_old	14-north	1987	10	7	MAL-north	0	1	0	middle	F	5958	8	7	68	0.350900466312912
north	correct_old	14-north	1987	10	7	SNO-north	0	1	0	NA	M	6323	8	7	68	0.350900466312912
north	correct_old	14-north	1987	10	7	ROU-north	0	0	0	NA	M	7784	8	7	68	0.350900466312912
north	correct_old	14-north	1987	10	7	KEN-north	0	0	0	NA	M	6688	8	7	68	0.350900466312912
north	correct_old	14-north	1987	10	7	DAR-north	0	0	0	NA	M	6688	8	7	68	0.350900466312912
north	correct_old	14-north	1987	10	7	MAC-north	0	1	0	NA	M	8514	8	7	68	0.350900466312912
north	correct_old	14-north	1987	10	7	BRU-north	0	1	0	NA	M	13263	8	7	68	0.350900466312912
north	correct_old	14-north	1987	10	7	GAU-north	0	1	0	high	F	5958	8	7	68	0.350900466312912
north	correct_old	14-north	1987	10	7	GOS-north	0	1	0	NA	F	576	8	7	68	0.350900466312912
north	correct_old	14-north	1987	10	7	ZOE-north	0	0	0	low	F	8149	8	7	68	0.350900466312912
north	correct_old	14-north	1987	10	7	CHA-north	0	1	0	high	F	16550	8	7	68	0.350900466312912
north	correct_old	14-north	1987	10	7	OND-north	0	1	0	high	F	12167	8	7	68	0.350900466312912
north	correct_old	14-north	1987	10	7	GIT-north	0	0	0	middle	F	13993	8	7	68	0.350900466312912
north	correct_old	14-north	1987	10	7	HER-north	0	0	1	middle	F	8149	8	7	68	0.350900466312912
north	correct_old	14-north	1987	10	7	ALI-north	0	1	0	NA	M	3036	8	7	68	0.350900466312912
north	correct_old	14-north	1987	10	7	POU-north	0	1	1	high	F	5227	8	7	68	0.350900466312912
north	correct_old	14-north	1987	10	7	SAR-north	0	0	0	NA	M	2670	8	7	68	0.350900466312912
north	correct_old	14-north	1987	10	7	ORE-north	0	1	0	NA	F	1453	8	7	68	0.350900466312912
north	correct_old	15-north	1987	10	7	FAL-north	0	1	0	NA	M	14358	8	5	68	0.350900466312912
north	correct_old	15-north	1987	10	7	OND-north	0	1	0	high	F	12167	8	5	68	0.350900466312912
north	correct_old	15-north	1987	10	7	ALI-north	0	1	0	NA	M	3036	8	5	68	0.350900466312912
north	correct_old	15-north	1987	10	7	BRU-north	0	1	0	NA	M	13263	8	5	68	0.350900466312912
north	correct_old	15-north	1987	10	7	SNO-north	0	1	0	NA	M	6323	8	5	68	0.350900466312912
north	correct_old	15-north	1987	10	7	MAC-north	0	1	0	NA	M	8514	8	5	68	0.350900466312912
north	correct_old	15-north	1987	10	7	ELL-north	0	1	0	high	F	11436	8	5	68	0.350900466312912
north	correct_old	15-north	1987	10	7	LOU-north	0	1	1	high	F	5592	8	5	68	0.350900466312912
north	correct_old	15-north	1987	10	7	ULY-north	0	1	0	NA	M	7784	8	5	68	0.350900466312912
north	correct_old	15-north	1987	10	7	SAL-north	0	1	0	high	F	10706	8	5	68	0.350900466312912
north	correct_old	15-north	1987	10	7	POU-north	0	1	1	high	F	5227	8	5	68	0.350900466312912
north	correct_old	15-north	1987	10	7	SAR-north	0	1	0	NA	M	2670	8	5	68	0.350900466312912
north	correct_old	15-north	1987	10	7	GIT-north	0	0	0	middle	F	13993	8	5	68	0.350900466312912
north	correct_old	15-north	1987	10	7	SAP-north	0	1	0	low	F	6323	8	5	68	0.350900466312912
north	correct_old	15-north	1987	10	7	MAL-north	0	1	0	middle	F	5958	8	5	68	0.350900466312912
north	correct_old	16-north	1987	10	9	ULY-north	0	0	0	NA	M	7786	2	7	68	0.350900466312912
north	correct_old	16-north	1987	10	9	DAR-north	0	0	0	NA	M	6690	2	7	68	0.350900466312912
north	correct_old	16-north	1987	10	9	KEN-north	0	0	0	NA	M	6690	2	7	68	0.350900466312912
north	correct_old	16-north	1987	10	9	SNO-north	0	0	0	NA	M	6325	2	7	68	0.350900466312912
north	correct_old	16-north	1987	10	9	MAC-north	0	1	0	NA	M	8516	2	7	68	0.350900466312912
north	correct_old	16-north	1987	10	9	BRU-north	0	0	0	NA	M	13265	2	7	68	0.350900466312912
north	correct_old	16-north	1987	10	9	GIT-north	0	0	0	middle	F	13995	2	7	68	0.350900466312912
north	correct_old	16-north	1987	10	9	ROU-north	0	1	0	NA	M	7786	2	7	68	0.350900466312912
north	correct_old	16-north	1987	10	9	GIP-north	0	0	0	NA	M	2550	2	7	68	0.350900466312912
north	correct_old	16-north	1987	10	9	SAP-north	0	0	0	low	F	6325	2	7	68	0.350900466312912
north	correct_old	16-north	1987	10	9	RUB-north	0	0	0	NA	F	1547	2	7	68	0.350900466312912
north	correct_old	16-north	1987	10	9	HAS-north	0	0	0	NA	M	3464	2	7	68	0.350900466312912
north	correct_old	17-north	1987	10	9	ULY-north	0	0	0	NA	M	7786	5	4	68	0.350900466312912
north	correct_old	17-north	1987	10	9	BRU-north	0	1	0	NA	M	13265	5	4	68	0.350900466312912
north	correct_old	17-north	1987	10	9	CHA-north	0	1	0	high	F	16552	5	4	68	0.350900466312912
north	correct_old	17-north	1987	10	9	SNO-north	0	0	0	NA	M	6325	5	4	68	0.350900466312912
north	correct_old	17-north	1987	10	9	MAL-north	0	0	0	middle	F	5960	5	4	68	0.350900466312912
north	correct_old	17-north	1987	10	9	MAC-north	0	1	0	NA	M	8516	5	4	68	0.350900466312912
north	correct_old	17-north	1987	10	9	SAL-north	0	1	0	high	F	10708	5	4	68	0.350900466312912
north	correct_old	17-north	1987	10	9	CHO-north	0	1	0	NA	F	2399	5	4	68	0.350900466312912
north	correct_old	17-north	1987	10	9	ALI-north	0	0	0	NA	M	3038	5	4	68	0.350900466312912
north	correct_old	17-north	1987	10	9	LOU-north	0	1	1	high	F	5594	5	4	68	0.350900466312912
north	correct_old	17-north	1987	10	9	GAU-north	0	1	0	high	F	5960	5	4	68	0.350900466312912
north	correct_old	17-north	1987	10	9	SAR-north	0	1	0	NA	M	2672	5	4	68	0.350900466312912
north	correct_old	18-north	1987	10	10	ULY-north	0	1	0	NA	M	7787	9	7	68	0.350900466312912
north	correct_old	18-north	1987	10	10	HER-north	0	0	1	middle	F	8152	9	7	68	0.350900466312912
north	correct_old	18-north	1987	10	10	MAC-north	0	1	0	NA	M	8517	9	7	68	0.350900466312912
north	correct_old	18-north	1987	10	10	CHA-north	0	0	0	high	F	16553	9	7	68	0.350900466312912
north	correct_old	18-north	1987	10	10	POU-north	0	1	1	high	F	5230	9	7	68	0.350900466312912
north	correct_old	18-north	1987	10	10	BRU-north	0	1	0	NA	M	13266	9	7	68	0.350900466312912
north	correct_old	18-north	1987	10	10	BIJ-north	0	1	0	NA	F	4500	9	7	68	0.350900466312912
north	correct_old	18-north	1987	10	10	SAP-north	0	1	0	low	F	6326	9	7	68	0.350900466312912
north	correct_old	18-north	1987	10	10	OND-north	0	0	0	high	F	12170	9	7	68	0.350900466312912
north	correct_old	18-north	1987	10	10	RIC-north	0	1	0	middle	F	8883	9	7	68	0.350900466312912
north	correct_old	18-north	1987	10	10	SAR-north	0	1	0	NA	M	2673	9	7	68	0.350900466312912
north	correct_old	18-north	1987	10	10	SNO-north	0	1	0	NA	M	6326	9	7	68	0.350900466312912
north	correct_old	18-north	1987	10	10	ROU-north	0	0	0	NA	M	7787	9	7	68	0.350900466312912
north	correct_old	18-north	1987	10	10	RUB-north	0	1	0	NA	F	1548	9	7	68	0.350900466312912
north	correct_old	18-north	1987	10	10	SAL-north	0	1	0	high	F	10709	9	7	68	0.350900466312912
north	correct_old	18-north	1987	10	10	ALI-north	0	1	0	NA	M	3039	9	7	68	0.350900466312912
north	correct_old	18-north	1987	10	10	MAL-north	0	0	0	middle	F	5961	9	7	68	0.350900466312912
north	correct_old	18-north	1987	10	10	KIR-north	0	1	1	middle	F	6691	9	7	68	0.350900466312912
north	correct_old	18-north	1987	10	10	MYS-north	1	0	0	NA	F	4500	9	7	68	0.350900466312912
north	correct_old	18-north	1987	10	10	HAS-north	0	0	0	NA	M	3465	9	7	68	0.350900466312912
north	correct_old	18-north	1987	10	10	IMI-north	0	0	0	NA	F	4134	9	7	68	0.350900466312912
north	correct_old	18-north	1987	10	10	FAL-north	0	0	0	NA	M	14361	9	7	68	0.350900466312912
north	correct_old	18-north	1987	10	10	DAR-north	0	0	0	NA	M	6691	9	7	68	0.350900466312912
north	correct_old	19-north	1987	10	11	MAC-north	0	1	0	NA	M	8518	3	7	68	0.350900466312912
north	correct_old	19-north	1987	10	11	ULY-north	0	0	0	NA	M	7788	3	7	68	0.350900466312912
north	correct_old	19-north	1987	10	11	DAR-north	0	0	0	NA	M	6692	3	7	68	0.350900466312912
north	correct_old	19-north	1987	10	11	BRU-north	0	1	0	NA	M	13267	3	7	68	0.350900466312912
north	correct_old	19-north	1987	10	11	FIT-north	0	0	0	NA	M	4501	3	7	68	0.350900466312912
north	correct_old	19-north	1987	10	11	SNO-north	0	0	0	NA	M	6327	3	7	68	0.350900466312912
north	correct_old	19-north	1987	10	11	GAU-north	0	0	0	high	F	5962	3	7	68	0.350900466312912
north	correct_old	19-north	1987	10	11	GAL-north	1	1	0	middle	F	8518	3	7	68	0.350900466312912
north	correct_old	19-north	1987	10	11	ROU-north	0	0	0	NA	M	7788	3	7	68	0.350900466312912
north	correct_old	19-north	1987	10	11	KEN-north	0	0	0	NA	M	6692	3	7	68	0.350900466312912
north	correct_old	19-north	1987	10	11	HAS-north	0	0	0	NA	M	3466	3	7	68	0.350900466312912
north	correct_old	19-north	1987	10	11	SAR-north	0	0	0	NA	M	2674	3	7	68	0.350900466312912
north	correct_old	19-north	1987	10	11	ALI-north	0	0	0	NA	M	3040	3	7	68	0.350900466312912
north	correct_old	19-north	1987	10	11	CHA-north	0	0	0	high	F	16554	3	7	68	0.350900466312912
north	correct_old	19-north	1987	10	11	BEL-north	1	0	0	NA	F	4256	3	7	68	0.350900466312912
north	correct_old	20-north	1987	10	13	ROU-north	0	1	0	NA	M	7790	9	7	68	0.350900466312912
north	correct_old	20-north	1987	10	13	ULY-north	0	1	0	NA	M	7790	9	7	68	0.350900466312912
north	correct_old	20-north	1987	10	13	SNO-north	0	1	0	NA	M	6329	9	7	68	0.350900466312912
north	correct_old	20-north	1987	10	13	DAR-north	0	0	0	NA	M	6694	9	7	68	0.350900466312912
north	correct_old	20-north	1987	10	13	MAC-north	0	1	0	NA	M	8520	9	7	68	0.350900466312912
north	correct_old	20-north	1987	10	13	GIP-north	0	0	0	NA	M	2554	9	7	68	0.350900466312912
north	correct_old	20-north	1987	10	13	HAS-north	0	0	0	NA	M	3468	9	7	68	0.350900466312912
north	correct_old	20-north	1987	10	13	MYS-north	1	1	0	NA	F	4503	9	7	68	0.350900466312912
north	correct_old	20-north	1987	10	13	IMI-north	0	0	0	NA	F	4137	9	7	68	0.350900466312912
north	correct_old	20-north	1987	10	13	LOU-north	0	1	1	high	F	5598	9	7	68	0.350900466312912
north	correct_old	20-north	1987	10	13	KEN-north	0	0	0	NA	M	6694	9	7	68	0.350900466312912
north	correct_old	20-north	1987	10	13	BRU-north	0	0	0	NA	M	13269	9	7	68	0.350900466312912
north	correct_old	20-north	1987	10	13	POU-north	0	1	1	high	F	5233	9	7	68	0.350900466312912
north	correct_old	20-north	1987	10	13	CHA-north	0	1	0	high	F	16556	9	7	68	0.350900466312912
north	correct_old	20-north	1987	10	13	MAL-north	0	1	0	middle	F	5964	9	7	68	0.350900466312912
north	correct_old	20-north	1987	10	13	KIR-north	0	1	1	middle	F	6694	9	7	68	0.350900466312912
north	correct_old	20-north	1987	10	13	HER-north	0	0	1	middle	F	8155	9	7	68	0.350900466312912
north	correct_old	20-north	1987	10	13	SAP-north	0	1	0	low	F	6329	9	7	68	0.350900466312912
north	correct_old	20-north	1987	10	13	XER-north	1	1	0	low	F	6329	9	7	68	0.350900466312912
north	correct_old	20-north	1987	10	13	BON-north	0	0	0	NA	F	3772	9	7	68	0.350900466312912
north	correct_old	20-north	1987	10	13	MOM-north	0	0	1	middle	F	6694	9	7	68	0.350900466312912
north	correct_old	20-north	1987	10	13	CHO-north	0	1	0	NA	F	2403	9	7	68	0.350900466312912
north	correct_old	21-north	1987	11	21	MAC-north	0	1	0	NA	M	8559	0	6	70	0.357476350939873
north	correct_old	21-north	1987	11	21	SNO-north	0	1	0	NA	M	6368	0	6	70	0.357476350939873
north	correct_old	21-north	1987	11	21	BRU-north	0	1	0	NA	M	13308	0	6	70	0.357476350939873
north	correct_old	21-north	1987	11	21	ALI-north	0	1	0	NA	M	3081	0	6	70	0.357476350939873
north	correct_old	21-north	1987	11	21	KEN-north	0	1	0	NA	M	6733	0	6	70	0.357476350939873
north	correct_old	21-north	1987	11	21	DAR-north	0	1	0	NA	M	6733	0	6	70	0.357476350939873
north	correct_old	21-north	1987	11	21	ULY-north	0	1	0	NA	M	7829	0	6	70	0.357476350939873
north	correct_old	22-north	1987	11	21	MAC-north	0	1	0	NA	M	8559	0	6	70	0.357476350939873
north	correct_old	22-north	1987	11	21	SNO-north	0	1	0	NA	M	6368	0	6	70	0.357476350939873
north	correct_old	22-north	1987	11	21	BRU-north	0	0	0	NA	M	13308	0	6	70	0.357476350939873
north	correct_old	22-north	1987	11	21	ALI-north	0	0	0	NA	M	3081	0	6	70	0.357476350939873
north	correct_old	22-north	1987	11	21	KEN-north	0	0	0	NA	M	6733	0	6	70	0.357476350939873
north	correct_old	22-north	1987	11	21	DAR-north	0	1	0	NA	M	6733	0	6	70	0.357476350939873
north	correct_old	22-north	1987	11	21	ULY-north	0	1	0	NA	M	7829	0	6	70	0.357476350939873
north	correct_old	23-north	1987	12	5	BRU-north	0	0	0	NA	M	13322	0	3	67	0.327869520897044
north	correct_old	23-north	1987	12	5	ALI-north	0	0	0	NA	M	3095	0	3	67	0.327869520897044
north	correct_old	23-north	1987	12	5	ROU-north	0	1	0	NA	M	7843	0	3	67	0.327869520897044
north	correct_old	23-north	1987	12	5	DAR-north	0	0	0	NA	M	6747	0	3	67	0.327869520897044
north	correct_old	24-north	1987	12	5	BRU-north	0	1	0	NA	M	13322	1	4	67	0.327869520897044
north	correct_old	24-north	1987	12	5	ALI-north	0	1	0	NA	M	3095	1	4	67	0.327869520897044
north	correct_old	24-north	1987	12	5	ROU-north	0	1	0	NA	M	7843	1	4	67	0.327869520897044
north	correct_old	24-north	1987	12	5	DAR-north	0	1	0	NA	M	6747	1	4	67	0.327869520897044
north	correct_old	24-north	1987	12	5	KEN-north	0	1	0	NA	M	6747	1	4	67	0.327869520897044
north	correct_old	24-north	1987	12	5	FIT-north	0	1	0	NA	M	4556	1	4	67	0.327869520897044
north	correct_old	24-north	1987	12	5	ELL-north	0	1	0	high	F	11495	1	4	67	0.327869520897044
north	correct_old	24-north	1987	12	5	GER-north	0	1	0	NA	M	1634	1	4	67	0.327869520897044
north	correct_old	25-north	1988	1	10	SNO-north	0	1	0	NA	M	6418	0	5	69	0.288867638855686
north	correct_old	25-north	1988	1	10	KEN-north	0	1	0	NA	M	6783	0	5	69	0.288867638855686
north	correct_old	25-north	1988	1	10	ULY-north	0	1	0	NA	M	7879	0	5	69	0.288867638855686
north	correct_old	25-north	1988	1	10	BRU-north	0	1	0	NA	M	13358	0	5	69	0.288867638855686
north	correct_old	25-north	1988	1	10	ROU-north	0	1	0	NA	M	7879	0	5	69	0.288867638855686
north	correct_old	25-north	1988	1	10	ALI-north	0	1	0	NA	M	3131	0	5	69	0.288867638855686
north	correct_old	26-north	1988	3	1	BRU-north	0	1	0	NA	M	13409	4	3	71	0.162569498690438
north	correct_old	26-north	1988	3	1	ROU-north	0	1	0	NA	M	7930	4	3	71	0.162569498690438
north	correct_old	26-north	1988	3	1	MAC-north	0	1	0	NA	M	8660	4	3	71	0.162569498690438
north	correct_old	26-north	1988	3	1	HER-north	0	1	1	middle	F	8295	4	3	71	0.162569498690438
north	correct_old	26-north	1988	3	1	SAL-north	0	1	1	high	F	10852	4	3	71	0.162569498690438
north	correct_old	26-north	1988	3	1	GIT-north	0	1	0	middle	F	14139	4	3	71	0.162569498690438
north	correct_old	26-north	1988	3	1	BIJ-north	0	1	0	NA	F	4643	4	3	71	0.162569498690438
north	correct_old	26-north	1988	3	1	ALI-north	0	1	0	NA	M	3182	4	3	71	0.162569498690438
north	correct_old	26-north	1988	3	1	SAR-north	0	1	0	NA	M	2816	4	3	71	0.162569498690438
north	correct_old	26-north	1988	3	1	ERO-north	0	1	0	NA	M	2086	4	3	71	0.162569498690438
north	correct_old	26-north	1988	3	1	GOM-north	1	0	1	middle	F	5373	4	3	71	0.162569498690438
north	correct_old	27-north	1988	3	13	POK-north	0	1	1	low	F	11594	7	5	71	0.162569498690438
north	correct_old	27-north	1988	3	13	SAL-north	0	1	1	high	F	10864	7	5	71	0.162569498690438
north	correct_old	27-north	1988	3	13	BRU-north	0	1	0	NA	M	13421	7	5	71	0.162569498690438
north	correct_old	27-north	1988	3	13	SAR-north	0	1	0	NA	M	2828	7	5	71	0.162569498690438
north	correct_old	27-north	1988	3	13	ALI-north	0	1	0	NA	M	3194	7	5	71	0.162569498690438
north	correct_old	27-north	1988	3	13	DAR-north	0	1	0	NA	M	6846	7	5	71	0.162569498690438
north	correct_old	27-north	1988	3	13	MAC-north	0	1	0	NA	M	8672	7	5	71	0.162569498690438
north	correct_old	27-north	1988	3	13	SNO-north	0	1	0	NA	M	6481	7	5	71	0.162569498690438
north	correct_old	27-north	1988	3	13	ROU-north	0	0	0	NA	M	7942	7	5	71	0.162569498690438
north	correct_old	27-north	1988	3	13	OND-north	0	1	1	high	F	12325	7	5	71	0.162569498690438
north	correct_old	27-north	1988	3	13	NOV-north	0	1	0	high	F	7942	7	5	71	0.162569498690438
north	correct_old	27-north	1988	3	13	ELL-north	0	1	0	high	F	11594	7	5	71	0.162569498690438
north	correct_old	27-north	1988	3	13	FIT-north	0	1	0	NA	M	4655	7	5	71	0.162569498690438
north	correct_old	27-north	1988	3	13	RUB-north	0	1	0	NA	F	1703	7	5	71	0.162569498690438
north	correct_old	27-north	1988	3	13	GAL-north	0	0	0	middle	F	8672	7	5	71	0.162569498690438
north	correct_old	27-north	1988	3	13	FAN-north	0	1	1	high	F	6846	7	5	71	0.162569498690438
north	correct_old	27-north	1988	3	13	PIT-north	0	0	0	NA	F	2068	7	5	71	0.162569498690438
north	correct_old	27-north	1988	3	13	ORE-north	0	1	0	NA	F	1611	7	5	71	0.162569498690438
north	correct_old	27-north	1988	3	13	IMI-north	0	0	0	NA	F	4289	7	5	71	0.162569498690438
north	correct_old	27-north	1988	3	13	MYS-north	0	1	0	NA	F	4655	7	5	71	0.162569498690438
north	correct_old	27-north	1988	3	13	NEG-north	0	1	0	NA	M	2098	7	5	71	0.162569498690438
north	correct_old	28-north	1988	9	5	IMI-north	0	1	0	NA	F	4465	2	6	63	0.285023355793477
north	correct_old	28-north	1988	9	5	BRU-north	0	1	0	NA	M	13597	2	6	63	0.285023355793477
north	correct_old	28-north	1988	9	5	ULY-north	0	1	0	NA	M	8118	2	6	63	0.285023355793477
north	correct_old	28-north	1988	9	5	MYS-north	1	1	0	high	F	4831	2	6	63	0.285023355793477
north	correct_old	28-north	1988	9	5	ALI-north	0	1	0	NA	M	3370	2	6	63	0.285023355793477
north	correct_old	28-north	1988	9	5	ROU-north	0	1	0	NA	M	8118	2	6	63	0.285023355793477
north	correct_old	28-north	1988	9	5	DAR-north	0	1	0	NA	M	7022	2	6	63	0.285023355793477
north	correct_old	28-north	1988	9	5	KEN-north	0	1	0	NA	M	7022	2	6	63	0.285023355793477
north	correct_old	28-north	1988	9	5	LOU-north	0	1	0	high	F	5926	2	6	63	0.285023355793477
north	correct_old	28-north	1988	9	5	PER-north	0	1	0	NA	F	4465	2	6	63	0.285023355793477
north	correct_old	28-north	1988	9	5	MAC-north	0	1	0	NA	M	8848	2	6	63	0.285023355793477
north	correct_old	29-north	1988	9	20	MAC-north	0	1	0	NA	M	8863	9	6	63	0.285023355793477
north	correct_old	29-north	1988	9	20	BRU-north	0	1	0	NA	M	13612	9	6	63	0.285023355793477
north	correct_old	29-north	1988	9	20	ALI-north	0	1	0	NA	M	3385	9	6	63	0.285023355793477
north	correct_old	29-north	1988	9	20	KEN-north	0	1	0	NA	M	7037	9	6	63	0.285023355793477
north	correct_old	29-north	1988	9	20	ROU-north	0	1	0	NA	M	8133	9	6	63	0.285023355793477
north	correct_old	29-north	1988	9	20	ELL-north	1	1	1	high	F	11785	9	6	63	0.285023355793477
north	correct_old	29-north	1988	9	20	FIT-north	0	0	0	NA	M	4846	9	6	63	0.285023355793477
north	correct_old	29-north	1988	9	20	OND-north	0	1	1	high	F	12516	9	6	63	0.285023355793477
north	correct_old	29-north	1988	9	20	DAR-north	0	0	0	NA	M	7037	9	6	63	0.285023355793477
north	correct_old	29-north	1988	9	20	ULY-north	0	1	0	NA	M	8133	9	6	63	0.285023355793477
north	correct_old	29-north	1988	9	20	SAR-north	0	1	0	NA	M	3019	9	6	63	0.285023355793477
north	correct_old	29-north	1988	9	20	LOU-north	0	1	0	high	F	5941	9	6	63	0.285023355793477
north	correct_old	29-north	1988	9	20	XER-north	1	1	0	low	F	6672	9	6	63	0.285023355793477
north	correct_old	29-north	1988	9	20	POU-north	0	0	1	high	F	5576	9	6	63	0.285023355793477
north	correct_old	29-north	1988	9	20	MAL-north	0	1	1	middle	F	6307	9	6	63	0.285023355793477
north	correct_old	29-north	1988	9	20	SAL-north	0	1	1	high	F	11055	9	6	63	0.285023355793477
north	correct_old	29-north	1988	9	20	ORE-north	0	1	0	NA	F	1802	9	6	63	0.285023355793477
north	correct_old	29-north	1988	9	20	GIT-north	0	1	0	middle	F	14342	9	6	63	0.285023355793477
north	correct_old	29-north	1988	9	20	GIP-north	0	0	0	NA	M	2897	9	6	63	0.285023355793477
north	correct_old	29-north	1988	9	20	BIJ-north	1	0	0	middle	F	4846	9	6	63	0.285023355793477
north	correct_old	30-north	1988	9	21	IMI-north	0	0	0	NA	F	4481	1	5	63	0.285023355793477
north	correct_old	30-north	1988	9	21	KEN-north	0	0	0	NA	M	7038	1	5	63	0.285023355793477
north	correct_old	30-north	1988	9	21	MAC-north	0	1	0	NA	M	8864	1	5	63	0.285023355793477
north	correct_old	30-north	1988	9	21	ROU-north	0	1	0	NA	M	8134	1	5	63	0.285023355793477
north	correct_old	30-north	1988	9	21	BRU-north	0	0	0	NA	M	13613	1	5	63	0.285023355793477
north	correct_old	30-north	1988	9	21	ALI-north	0	0	0	NA	M	3386	1	5	63	0.285023355793477
north	correct_old	30-north	1988	9	21	ULY-north	0	1	0	NA	M	8134	1	5	63	0.285023355793477
north	correct_old	30-north	1988	9	21	GOM-north	1	1	0	middle	F	5577	1	5	63	0.285023355793477
north	correct_old	30-north	1988	9	21	MOL-north	0	0	0	NA	M	2410	1	5	63	0.285023355793477
north	correct_old	31-north	1988	9	28	KEN-north	0	1	0	NA	M	7045	8	6	63	0.285023355793477
north	correct_old	31-north	1988	9	28	ULY-north	0	1	0	NA	M	8141	8	6	63	0.285023355793477
north	correct_old	31-north	1988	9	28	MAC-north	0	1	0	NA	M	8871	8	6	63	0.285023355793477
north	correct_old	31-north	1988	9	28	BRU-north	0	1	0	NA	M	13620	8	6	63	0.285023355793477
north	correct_old	31-north	1988	9	28	ROU-north	0	1	0	NA	M	8141	8	6	63	0.285023355793477
north	correct_old	31-north	1988	9	28	ZOE-north	1	1	0	low	F	8506	8	6	63	0.285023355793477
north	correct_old	31-north	1988	9	28	IMI-north	0	1	0	NA	F	4488	8	6	63	0.285023355793477
north	correct_old	31-north	1988	9	28	MAL-north	0	0	1	middle	F	6315	8	6	63	0.285023355793477
north	correct_old	31-north	1988	9	28	ALI-north	0	1	0	NA	M	3393	8	6	63	0.285023355793477
north	correct_old	31-north	1988	9	28	CHA-north	0	0	1	middle	F	16907	8	6	63	0.285023355793477
north	correct_old	31-north	1988	9	28	POU-north	0	0	1	high	F	5584	8	6	63	0.285023355793477
north	correct_old	31-north	1988	9	28	BIJ-north	1	0	0	middle	F	4854	8	6	63	0.285023355793477
north	correct_old	31-north	1988	9	28	DAR-north	0	1	0	NA	M	7045	8	6	63	0.285023355793477
north	correct_old	31-north	1988	9	28	BON-north	0	0	0	NA	F	4123	8	6	63	0.285023355793477
north	correct_old	31-north	1988	9	28	XER-north	1	0	0	low	F	6680	8	6	63	0.285023355793477
north	correct_old	31-north	1988	9	28	PER-north	1	1	0	NA	F	4488	8	6	63	0.285023355793477
north	correct_old	31-north	1988	9	28	OND-north	0	0	1	high	F	12524	8	6	63	0.285023355793477
north	correct_old	31-north	1988	9	28	NOV-north	1	1	0	high	F	8141	8	6	63	0.285023355793477
north	correct_old	32-north	1988	10	1	KEN-north	0	0	0	NA	M	7048	12	6	61	0.350900466312912
north	correct_old	32-north	1988	10	1	HER-north	0	1	1	middle	F	8509	12	6	61	0.350900466312912
north	correct_old	32-north	1988	10	1	ERO-north	0	1	0	NA	M	2300	12	6	61	0.350900466312912
north	correct_old	32-north	1988	10	1	OND-north	0	1	1	high	F	12527	12	6	61	0.350900466312912
north	correct_old	32-north	1988	10	1	GIT-north	0	1	0	middle	F	14353	12	6	61	0.350900466312912
north	correct_old	32-north	1988	10	1	BRU-north	0	1	0	NA	M	13623	12	6	61	0.350900466312912
north	correct_old	32-north	1988	10	1	ROU-north	0	1	0	NA	M	8144	12	6	61	0.350900466312912
north	correct_old	32-north	1988	10	1	ULY-north	0	1	0	NA	M	8144	12	6	61	0.350900466312912
north	correct_old	32-north	1988	10	1	PER-north	1	0	0	NA	F	4491	12	6	61	0.350900466312912
north	correct_old	32-north	1988	10	1	ALI-north	0	1	0	NA	M	3396	12	6	61	0.350900466312912
north	correct_old	32-north	1988	10	1	FIT-north	0	0	0	NA	M	4857	12	6	61	0.350900466312912
north	correct_old	32-north	1988	10	1	MAC-north	0	1	0	NA	M	8874	12	6	61	0.350900466312912
north	correct_old	32-north	1988	10	1	ELL-north	0	1	1	high	F	11796	12	6	61	0.350900466312912
north	correct_old	32-north	1988	10	1	SAL-north	0	1	1	high	F	11066	12	6	61	0.350900466312912
north	correct_old	32-north	1988	10	1	DAR-north	0	1	0	NA	M	7048	12	6	61	0.350900466312912
north	correct_old	32-north	1988	10	1	SAR-north	0	1	0	NA	M	3030	12	6	61	0.350900466312912
north	correct_old	32-north	1988	10	1	ORE-north	0	1	0	NA	F	1813	12	6	61	0.350900466312912
north	correct_old	32-north	1988	10	1	ZOE-north	1	1	0	low	F	8509	12	6	61	0.350900466312912
north	correct_old	32-north	1988	10	1	POU-north	0	1	1	high	F	5587	12	6	61	0.350900466312912
north	correct_old	32-north	1988	10	1	MAL-north	0	0	1	middle	F	6318	12	6	61	0.350900466312912
north	correct_old	32-north	1988	10	1	NOV-north	1	1	0	high	F	8144	12	6	61	0.350900466312912
north	correct_old	32-north	1988	10	1	GIP-north	0	0	0	NA	M	2908	12	6	61	0.350900466312912
north	correct_old	32-north	1988	10	1	TOS-north	0	0	0	high	F	11796	12	6	61	0.350900466312912
north	correct_old	32-north	1988	10	1	TIN-north	0	0	0	NA	F	3396	12	6	61	0.350900466312912
north	correct_old	32-north	1988	10	1	BEL-north	1	0	0	NA	F	4612	12	6	61	0.350900466312912
north	correct_old	32-north	1988	10	1	BIJ-north	0	0	0	middle	F	4857	12	6	61	0.350900466312912
north	correct_old	32-north	1988	10	1	KIR-north	0	0	1	middle	F	7048	12	6	61	0.350900466312912
north	correct_old	32-north	1988	10	1	MOL-north	0	0	0	NA	M	2420	12	6	61	0.350900466312912
north	correct_old	33-north	1988	10	8	ROU-north	0	0	0	NA	M	8151	9	4	61	0.350900466312912
north	correct_old	33-north	1988	10	8	DAR-north	0	1	0	NA	M	7055	9	4	61	0.350900466312912
north	correct_old	33-north	1988	10	8	NOV-north	1	1	0	high	F	8151	9	4	61	0.350900466312912
north	correct_old	33-north	1988	10	8	POU-north	0	0	1	high	F	5594	9	4	61	0.350900466312912
north	correct_old	33-north	1988	10	8	MAL-north	0	0	1	middle	F	6325	9	4	61	0.350900466312912
north	correct_old	33-north	1988	10	8	PER-north	1	0	0	NA	F	4498	9	4	61	0.350900466312912
north	correct_old	33-north	1988	10	8	LOU-north	0	0	0	high	F	5959	9	4	61	0.350900466312912
north	correct_old	33-north	1988	10	8	BRU-north	0	1	0	NA	M	13630	9	4	61	0.350900466312912
north	correct_old	33-north	1988	10	8	ALI-north	0	1	0	NA	M	3403	9	4	61	0.350900466312912
north	correct_old	33-north	1988	10	8	ULY-north	0	1	0	NA	M	8151	9	4	61	0.350900466312912
north	correct_old	33-north	1988	10	8	HER-north	0	0	1	middle	F	8516	9	4	61	0.350900466312912
north	correct_old	33-north	1988	10	8	ELL-north	0	1	1	high	F	11803	9	4	61	0.350900466312912
north	correct_old	33-north	1988	10	8	OND-north	0	1	1	high	F	12534	9	4	61	0.350900466312912
north	correct_old	33-north	1988	10	8	MYS-north	0	1	0	high	F	4864	9	4	61	0.350900466312912
north	correct_old	33-north	1988	10	8	SAL-north	0	0	1	high	F	11073	9	4	61	0.350900466312912
north	correct_old	34-north	1988	10	8	ROU-north	0	0	0	NA	M	8151	3	4	61	0.350900466312912
north	correct_old	34-north	1988	10	8	ULY-north	0	1	0	NA	M	8151	3	4	61	0.350900466312912
north	correct_old	34-north	1988	10	8	DAR-north	0	0	0	NA	M	7055	3	4	61	0.350900466312912
north	correct_old	34-north	1988	10	8	BRU-north	0	0	0	NA	M	13630	3	4	61	0.350900466312912
north	correct_old	34-north	1988	10	8	SAL-north	0	0	1	high	F	11073	3	4	61	0.350900466312912
north	correct_old	34-north	1988	10	8	LOU-north	0	0	0	high	F	5959	3	4	61	0.350900466312912
north	correct_old	34-north	1988	10	8	OND-north	0	1	1	high	F	12534	3	4	61	0.350900466312912
north	correct_old	34-north	1988	10	8	SAR-north	0	0	0	NA	M	3037	3	4	61	0.350900466312912
north	correct_old	35-north	1988	10	9	ROU-north	0	1	0	NA	M	8152	0	3	61	0.350900466312912
north	correct_old	35-north	1988	10	9	ULY-north	0	1	0	NA	M	8152	0	3	61	0.350900466312912
north	correct_old	35-north	1988	10	9	BRU-north	0	1	0	NA	M	13631	0	3	61	0.350900466312912
north	correct_old	35-north	1988	10	9	ALI-north	0	1	0	NA	M	3404	0	3	61	0.350900466312912
north	correct_old	35-north	1988	10	9	PER-north	1	1	0	NA	F	4499	0	3	61	0.350900466312912
north	correct_old	36-north	1988	10	10	ROU-north	0	1	0	NA	M	8153	10	4	61	0.350900466312912
north	correct_old	36-north	1988	10	10	ULY-north	0	1	0	NA	M	8153	10	4	61	0.350900466312912
north	correct_old	36-north	1988	10	10	BRU-north	0	1	0	NA	M	13632	10	4	61	0.350900466312912
north	correct_old	36-north	1988	10	10	ALI-north	0	1	0	NA	M	3405	10	4	61	0.350900466312912
north	correct_old	36-north	1988	10	10	PER-north	1	1	0	NA	F	4500	10	4	61	0.350900466312912
north	correct_old	36-north	1988	10	10	SAL-north	0	1	1	high	F	11075	10	4	61	0.350900466312912
north	correct_old	36-north	1988	10	10	SAR-north	0	1	0	NA	M	3039	10	4	61	0.350900466312912
north	correct_old	36-north	1988	10	10	DAR-north	0	1	0	NA	M	7057	10	4	61	0.350900466312912
north	correct_old	36-north	1988	10	10	NOV-north	1	1	0	high	F	8153	10	4	61	0.350900466312912
north	correct_old	36-north	1988	10	10	LOU-north	0	1	0	high	F	5961	10	4	61	0.350900466312912
north	correct_old	36-north	1988	10	10	POK-north	0	1	1	low	F	11805	10	4	61	0.350900466312912
north	correct_old	36-north	1988	10	10	RIC-north	0	1	1	middle	F	9249	10	4	61	0.350900466312912
north	correct_old	36-north	1988	10	10	GAL-north	1	0	0	middle	F	8883	10	4	61	0.350900466312912
north	correct_old	36-north	1988	10	10	LYC-north	0	1	0	NA	F	954	10	4	61	0.350900466312912
north	correct_old	36-north	1988	10	10	OND-north	0	1	1	high	F	12536	10	4	61	0.350900466312912
north	correct_old	36-north	1988	10	10	ORE-north	0	1	0	NA	F	1822	10	4	61	0.350900466312912
north	correct_old	36-north	1988	10	10	HER-north	0	1	1	middle	F	8518	10	4	61	0.350900466312912
north	correct_old	36-north	1988	10	10	KIR-north	0	0	1	middle	F	7057	10	4	61	0.350900466312912
north	correct_old	36-north	1988	10	10	MOL-north	0	0	0	NA	M	2429	10	4	61	0.350900466312912
north	correct_old	36-north	1988	10	10	FAN-north	0	1	1	high	F	7057	10	4	61	0.350900466312912
north	correct_old	36-north	1988	10	10	BEL-north	1	0	0	NA	F	4621	10	4	61	0.350900466312912
north	correct_old	36-north	1988	10	10	ERO-north	0	1	0	NA	M	2309	10	4	61	0.350900466312912
north	correct_old	36-north	1988	10	10	MAR-north	0	1	0	NA	M	2370	10	4	61	0.350900466312912
north	correct_old	37-north	1988	10	24	BRU-north	0	1	0	NA	M	13646	8	4	61	0.350900466312912
north	correct_old	37-north	1988	10	24	ULY-north	0	1	0	NA	M	8167	8	4	61	0.350900466312912
north	correct_old	37-north	1988	10	24	BIJ-north	1	1	0	middle	F	4880	8	4	61	0.350900466312912
north	correct_old	37-north	1988	10	24	PER-north	0	1	0	NA	F	4514	8	4	61	0.350900466312912
north	correct_old	37-north	1988	10	24	OND-north	0	1	1	high	F	12550	8	4	61	0.350900466312912
north	correct_old	37-north	1988	10	24	SAL-north	0	1	1	high	F	11089	8	4	61	0.350900466312912
north	correct_old	37-north	1988	10	24	ROU-north	0	1	0	NA	M	8167	8	4	61	0.350900466312912
north	correct_old	37-north	1988	10	24	MAC-north	0	1	0	NA	M	8897	8	4	61	0.350900466312912
north	correct_old	37-north	1988	10	24	ALI-north	0	1	0	NA	M	3419	8	4	61	0.350900466312912
north	correct_old	37-north	1988	10	24	SAR-north	0	1	0	NA	M	3053	8	4	61	0.350900466312912
north	correct_old	37-north	1988	10	24	MYS-north	0	1	0	high	F	4880	8	4	61	0.350900466312912
north	correct_old	37-north	1988	10	24	LOU-north	0	0	0	high	F	5975	8	4	61	0.350900466312912
north	correct_old	37-north	1988	10	24	MAE-north	1	0	0	low	F	6341	8	4	61	0.350900466312912
north	correct_old	37-north	1988	10	24	KIR-north	0	1	1	middle	F	7071	8	4	61	0.350900466312912
north	correct_old	37-north	1988	10	24	XER-north	1	1	0	low	F	6706	8	4	61	0.350900466312912
north	correct_old	38-north	1988	10	26	BRU-north	0	1	0	NA	M	13648	10	4	61	0.350900466312912
north	correct_old	38-north	1988	10	26	ROU-north	0	1	0	NA	M	8169	10	4	61	0.350900466312912
north	correct_old	38-north	1988	10	26	OND-north	0	1	1	high	F	12552	10	4	61	0.350900466312912
north	correct_old	38-north	1988	10	26	SAL-north	0	1	1	high	F	11091	10	4	61	0.350900466312912
north	correct_old	38-north	1988	10	26	KIR-north	0	0	1	middle	F	7073	10	4	61	0.350900466312912
north	correct_old	38-north	1988	10	26	ALI-north	0	1	0	NA	M	3421	10	4	61	0.350900466312912
north	correct_old	38-north	1988	10	26	BIJ-north	1	0	0	middle	F	4882	10	4	61	0.350900466312912
north	correct_old	38-north	1988	10	26	PER-north	0	0	0	NA	F	4516	10	4	61	0.350900466312912
north	correct_old	38-north	1988	10	26	MAL-north	0	0	1	middle	F	6343	10	4	61	0.350900466312912
north	correct_old	38-north	1988	10	26	POU-north	0	0	1	high	F	5612	10	4	61	0.350900466312912
north	correct_old	38-north	1988	10	26	MYS-north	0	0	0	high	F	4882	10	4	61	0.350900466312912
north	correct_old	38-north	1988	10	26	SAR-north	0	1	0	NA	M	3055	10	4	61	0.350900466312912
north	correct_old	38-north	1988	10	26	ULY-north	0	1	0	NA	M	8169	10	4	61	0.350900466312912
north	correct_old	38-north	1988	10	26	MAC-north	0	1	0	NA	M	8899	10	4	61	0.350900466312912
north	correct_old	38-north	1988	10	26	GIT-north	0	1	0	middle	F	14378	10	4	61	0.350900466312912
north	correct_old	38-north	1988	10	26	GIP-north	0	0	0	NA	M	2933	10	4	61	0.350900466312912
north	correct_old	38-north	1988	10	26	HER-north	0	1	1	middle	F	8534	10	4	61	0.350900466312912
north	correct_old	38-north	1988	10	26	FAN-north	0	1	1	high	F	7073	10	4	61	0.350900466312912
north	correct_old	38-north	1988	10	26	MAR-north	0	1	0	NA	M	2386	10	4	61	0.350900466312912
north	correct_old	38-north	1988	10	26	ERO-north	0	1	0	NA	M	2325	10	4	61	0.350900466312912
north	correct_old	39-north	1988	10	27	MAC-north	0	1	0	NA	M	8900	3	3	61	0.350900466312912
north	correct_old	39-north	1988	10	27	ULY-north	0	0	0	NA	M	8170	3	3	61	0.350900466312912
north	correct_old	39-north	1988	10	27	ROU-north	0	1	0	NA	M	8170	3	3	61	0.350900466312912
north	correct_old	39-north	1988	10	27	OND-north	0	0	1	high	F	12553	3	3	61	0.350900466312912
north	correct_old	39-north	1988	10	27	SAL-north	0	0	1	high	F	11092	3	3	61	0.350900466312912
north	correct_old	39-north	1988	10	27	TOS-north	0	1	0	high	F	11822	3	3	61	0.350900466312912
north	correct_old	39-north	1988	10	27	TAR-north	0	0	0	NA	M	1716	3	3	61	0.350900466312912
north	correct_old	40-north	1988	10	30	ROU-north	0	1	0	NA	M	8173	15	5	61	0.350900466312912
north	correct_old	40-north	1988	10	30	MAC-north	0	1	0	NA	M	8903	15	5	61	0.350900466312912
north	correct_old	40-north	1988	10	30	ULY-north	0	1	0	NA	M	8173	15	5	61	0.350900466312912
north	correct_old	40-north	1988	10	30	SAL-north	0	1	1	high	F	11095	15	5	61	0.350900466312912
north	correct_old	40-north	1988	10	30	KEN-north	0	0	0	NA	M	7077	15	5	61	0.350900466312912
north	correct_old	40-north	1988	10	30	SAR-north	0	1	0	NA	M	3059	15	5	61	0.350900466312912
north	correct_old	40-north	1988	10	30	ALI-north	0	1	0	NA	M	3425	15	5	61	0.350900466312912
north	correct_old	40-north	1988	10	30	DAR-north	0	1	0	NA	M	7077	15	5	61	0.350900466312912
north	correct_old	40-north	1988	10	30	NOV-north	1	1	0	high	F	8173	15	5	61	0.350900466312912
north	correct_old	40-north	1988	10	30	RIC-north	0	1	1	middle	F	9269	15	5	61	0.350900466312912
north	correct_old	40-north	1988	10	30	POK-north	0	0	1	low	F	11825	15	5	61	0.350900466312912
north	correct_old	40-north	1988	10	30	IMI-north	0	0	0	NA	F	4520	15	5	61	0.350900466312912
north	correct_old	40-north	1988	10	30	MAE-north	1	0	0	low	F	6347	15	5	61	0.350900466312912
north	correct_old	40-north	1988	10	30	HER-north	0	1	1	middle	F	8538	15	5	61	0.350900466312912
north	correct_old	40-north	1988	10	30	ERO-north	0	1	0	NA	M	2329	15	5	61	0.350900466312912
north	correct_old	40-north	1988	10	30	POU-north	0	1	1	high	F	5616	15	5	61	0.350900466312912
north	correct_old	40-north	1988	10	30	GAL-north	1	0	0	middle	F	8903	15	5	61	0.350900466312912
north	correct_old	40-north	1988	10	30	ELL-north	0	1	1	high	F	11825	15	5	61	0.350900466312912
north	correct_old	40-north	1988	10	30	FIT-north	0	0	0	NA	M	4886	15	5	61	0.350900466312912
north	correct_old	40-north	1988	10	30	GER-north	0	0	0	NA	M	1964	15	5	61	0.350900466312912
north	correct_old	40-north	1988	10	30	MAL-north	0	1	1	middle	F	6347	15	5	61	0.350900466312912
north	correct_old	40-north	1988	10	30	OND-north	0	1	1	high	F	12556	15	5	61	0.350900466312912
north	correct_old	40-north	1988	10	30	KIR-north	0	1	1	middle	F	7077	15	5	61	0.350900466312912
north	correct_old	40-north	1988	10	30	LOU-north	0	0	0	high	F	5981	15	5	61	0.350900466312912
north	correct_old	40-north	1988	10	30	GIT-north	0	1	0	middle	F	14382	15	5	61	0.350900466312912
north	correct_old	40-north	1988	10	30	GIP-north	0	1	0	NA	M	2937	15	5	61	0.350900466312912
north	correct_old	40-north	1988	10	30	GOY-north	0	1	0	NA	F	1203	15	5	61	0.350900466312912
north	correct_old	40-north	1988	10	30	FAN-north	0	0	1	high	F	7077	15	5	61	0.350900466312912
north	correct_old	40-north	1988	10	30	MAR-north	0	0	0	NA	M	2390	15	5	61	0.350900466312912
north	correct_old	41-north	1989	2	5	HER-north	0	0	1	middle	F	8636	11	5	62	0.215303405428131
north	correct_old	41-north	1989	2	5	GAL-north	1	1	0	middle	F	9001	11	5	62	0.215303405428131
north	correct_old	41-north	1989	2	5	KEN-north	0	0	0	NA	M	7175	11	5	62	0.215303405428131
north	correct_old	41-north	1989	2	5	MAC-north	0	0	0	NA	M	9001	11	5	62	0.215303405428131
north	correct_old	41-north	1989	2	5	ROU-north	0	0	0	NA	M	8271	11	5	62	0.215303405428131
north	correct_old	41-north	1989	2	5	BRU-north	0	0	0	NA	M	13750	11	5	62	0.215303405428131
north	correct_old	41-north	1989	2	5	ELL-north	0	0	1	high	F	11923	11	5	62	0.215303405428131
north	correct_old	41-north	1989	2	5	FAN-north	0	1	1	high	F	7175	11	5	62	0.215303405428131
north	correct_old	41-north	1989	2	5	TIN-north	0	0	0	NA	F	3523	11	5	62	0.215303405428131
north	correct_old	41-north	1989	2	5	IMI-north	1	0	0	NA	F	4618	11	5	62	0.215303405428131
north	correct_old	41-north	1989	2	5	CAS-north	1	0	0	NA	F	4618	11	5	62	0.215303405428131
north	correct_old	41-north	1989	2	5	ULY-north	0	0	0	NA	M	8271	11	5	62	0.215303405428131
north	correct_old	41-north	1989	2	5	MAR-north	0	1	0	NA	M	2488	11	5	62	0.215303405428131
north	correct_old	41-north	1989	2	5	GER-north	0	0	0	NA	M	2062	11	5	62	0.215303405428131
north	correct_old	41-north	1989	2	5	GIT-north	0	0	0	middle	F	14480	11	5	62	0.215303405428131
north	correct_old	41-north	1989	2	5	KIR-north	0	0	1	middle	F	7175	11	5	62	0.215303405428131
north	correct_old	41-north	1989	2	5	MYS-north	0	0	1	high	F	4984	11	5	62	0.215303405428131
north	correct_old	41-north	1989	2	5	BIJ-north	0	0	0	middle	F	4984	11	5	62	0.215303405428131
north	correct_old	41-north	1989	2	5	GOM-north	0	0	0	middle	F	5714	11	5	62	0.215303405428131
north	correct_old	41-north	1989	2	5	XER-north	0	0	0	low	F	6810	11	5	62	0.215303405428131
north	correct_old	41-north	1989	2	5	BON-north	1	0	0	NA	F	4253	11	5	62	0.215303405428131
north	correct_old	41-north	1989	2	5	MOL-north	0	0	0	NA	M	2547	11	5	62	0.215303405428131
north	correct_old	41-north	1989	2	5	MAL-north	1	0	1	high	F	6445	11	5	62	0.215303405428131
north	correct_old	41-north	1989	2	5	FIT-north	0	1	0	NA	M	4984	11	5	62	0.215303405428131
north	correct_old	42-north	1989	2	7	ULY-north	0	0	0	NA	M	8273	7	6	62	0.215303405428131
north	correct_old	42-north	1989	2	7	MAC-north	0	0	0	NA	M	9003	7	6	62	0.215303405428131
north	correct_old	42-north	1989	2	7	OND-north	0	1	1	high	F	12656	7	6	62	0.215303405428131
north	correct_old	42-north	1989	2	7	KEN-north	0	0	0	NA	M	7177	7	6	62	0.215303405428131
north	correct_old	42-north	1989	2	7	PER-north	1	0	0	NA	F	4620	7	6	62	0.215303405428131
north	correct_old	42-north	1989	2	7	DAR-north	0	0	0	NA	M	7177	7	6	62	0.215303405428131
north	correct_old	42-north	1989	2	7	ROU-north	0	0	0	NA	M	8273	7	6	62	0.215303405428131
north	correct_old	42-north	1989	2	7	SAL-north	0	1	1	high	F	11195	7	6	62	0.215303405428131
north	correct_old	42-north	1989	2	7	SAR-north	0	1	0	NA	M	3159	7	6	62	0.215303405428131
north	correct_old	42-north	1989	2	7	NOV-north	0	1	0	high	F	8273	7	6	62	0.215303405428131
north	correct_old	42-north	1989	2	7	IMI-north	1	0	0	NA	F	4620	7	6	62	0.215303405428131
north	correct_old	42-north	1989	2	7	GOM-north	0	0	0	middle	F	5716	7	6	62	0.215303405428131
north	correct_old	42-north	1989	2	7	LOU-north	0	0	0	high	F	6081	7	6	62	0.215303405428131
north	correct_old	42-north	1989	2	7	HER-north	0	1	1	middle	F	8638	7	6	62	0.215303405428131
north	correct_old	42-north	1989	2	7	ALI-north	0	1	0	NA	M	3525	7	6	62	0.215303405428131
north	correct_old	42-north	1989	2	7	BIJ-north	0	0	0	middle	F	4986	7	6	62	0.215303405428131
north	correct_old	42-north	1989	2	7	BRU-north	0	1	0	NA	M	13752	7	6	62	0.215303405428131
north	correct_old	43-north	1989	2	9	MYS-north	0	1	1	high	F	4988	14	6	62	0.215303405428131
north	correct_old	43-north	1989	2	9	MAC-north	0	1	0	NA	M	9005	14	6	62	0.215303405428131
north	correct_old	43-north	1989	2	9	KEN-north	0	0	0	NA	M	7179	14	6	62	0.215303405428131
north	correct_old	43-north	1989	2	9	SAL-north	0	1	1	high	F	11197	14	6	62	0.215303405428131
north	correct_old	43-north	1989	2	9	ELL-north	0	0	1	high	F	11927	14	6	62	0.215303405428131
north	correct_old	43-north	1989	2	9	MAR-north	0	0	0	NA	M	2492	14	6	62	0.215303405428131
north	correct_old	43-north	1989	2	9	BEL-north	1	0	0	NA	F	4743	14	6	62	0.215303405428131
north	correct_old	43-north	1989	2	9	GOM-north	0	0	0	middle	F	5718	14	6	62	0.215303405428131
north	correct_old	43-north	1989	2	9	BRU-north	0	1	0	NA	M	13754	14	6	62	0.215303405428131
north	correct_old	43-north	1989	2	9	MAL-north	1	1	1	high	F	6449	14	6	62	0.215303405428131
north	correct_old	43-north	1989	2	9	TAR-north	0	0	0	NA	M	1821	14	6	62	0.215303405428131
north	correct_old	43-north	1989	2	9	ALI-north	0	1	0	NA	M	3527	14	6	62	0.215303405428131
north	correct_old	43-north	1989	2	9	NOV-north	0	1	0	high	F	8275	14	6	62	0.215303405428131
north	correct_old	43-north	1989	2	9	BON-north	1	0	0	NA	F	4257	14	6	62	0.215303405428131
north	correct_old	43-north	1989	2	9	BIJ-north	0	1	0	middle	F	4988	14	6	62	0.215303405428131
north	correct_old	43-north	1989	2	9	LOU-north	0	1	0	high	F	6083	14	6	62	0.215303405428131
north	correct_old	43-north	1989	2	9	CHO-north	0	0	0	NA	F	2888	14	6	62	0.215303405428131
north	correct_old	43-north	1989	2	9	POU-north	0	1	1	high	F	5718	14	6	62	0.215303405428131
north	correct_old	43-north	1989	2	9	XER-north	0	0	0	low	F	6814	14	6	62	0.215303405428131
north	correct_old	43-north	1989	2	9	ROU-north	0	1	0	NA	M	8275	14	6	62	0.215303405428131
north	correct_old	43-north	1989	2	9	OND-north	0	1	1	high	F	12658	14	6	62	0.215303405428131
north	correct_old	43-north	1989	2	9	DAR-north	0	1	0	NA	M	7179	14	6	62	0.215303405428131
north	correct_old	43-north	1989	2	9	ULY-north	0	1	0	NA	M	8275	14	6	62	0.215303405428131
north	correct_old	43-north	1989	2	9	FIT-north	0	0	0	NA	M	4988	14	6	62	0.215303405428131
north	correct_old	43-north	1989	2	9	SAR-north	0	1	0	NA	M	3161	14	6	62	0.215303405428131
north	correct_old	43-north	1989	2	9	GIT-north	0	1	0	middle	F	14484	14	6	62	0.215303405428131
north	correct_old	43-north	1989	2	9	HER-north	0	1	1	middle	F	8640	14	6	62	0.215303405428131
north	correct_old	43-north	1989	2	9	KIR-north	0	1	1	middle	F	7179	14	6	62	0.215303405428131
north	correct_old	43-north	1989	2	9	GIP-north	0	1	0	NA	M	3039	14	6	62	0.215303405428131
north	correct_old	43-north	1989	2	9	GOY-north	0	1	0	NA	F	1305	14	6	62	0.215303405428131
north	correct_old	43-north	1989	2	9	TIN-north	0	1	0	NA	F	3527	14	6	62	0.215303405428131
north	correct_old	44-north	1989	2	14	BRU-north	0	0	0	NA	M	13759	3	6	62	0.215303405428131
north	correct_old	44-north	1989	2	14	ULY-north	0	0	0	NA	M	8280	3	6	62	0.215303405428131
north	correct_old	44-north	1989	2	14	FIT-north	0	0	0	NA	M	4993	3	6	62	0.215303405428131
north	correct_old	44-north	1989	2	14	ELL-north	0	0	1	high	F	11932	3	6	62	0.215303405428131
north	correct_old	44-north	1989	2	14	KEN-north	0	0	0	NA	M	7184	3	6	62	0.215303405428131
north	correct_old	44-north	1989	2	14	ROU-north	0	1	0	NA	M	8280	3	6	62	0.215303405428131
north	correct_old	44-north	1989	2	14	IMI-north	0	0	0	NA	F	4627	3	6	62	0.215303405428131
north	correct_old	44-north	1989	2	14	GER-north	0	0	0	NA	M	2071	3	6	62	0.215303405428131
north	correct_old	44-north	1989	2	14	DAR-north	0	0	0	NA	M	7184	3	6	62	0.215303405428131
north	correct_old	44-north	1989	2	14	TAR-north	0	0	0	NA	M	1826	3	6	62	0.215303405428131
north	correct_old	44-north	1989	2	14	ALI-north	0	0	0	NA	M	3532	3	6	62	0.215303405428131
north	correct_old	44-north	1989	2	14	MAC-north	0	0	0	NA	M	9010	3	6	62	0.215303405428131
north	correct_old	44-north	1989	2	14	OND-north	0	0	1	high	F	12663	3	6	62	0.215303405428131
north	correct_old	44-north	1989	2	14	SAL-north	0	0	1	high	F	11202	3	6	62	0.215303405428131
north	correct_old	44-north	1989	2	14	CAS-north	1	0	0	NA	F	4627	3	6	62	0.215303405428131
north	correct_old	45-north	1989	3	9	BRU-north	0	1	0	NA	M	13782	9	6	59	0.162569498690438
north	correct_old	45-north	1989	3	9	MAC-north	0	1	0	NA	M	9033	9	6	59	0.162569498690438
north	correct_old	45-north	1989	3	9	KEN-north	0	1	0	NA	M	7207	9	6	59	0.162569498690438
north	correct_old	45-north	1989	3	9	ULY-north	0	1	0	NA	M	8303	9	6	59	0.162569498690438
north	correct_old	45-north	1989	3	9	ROU-north	0	0	0	NA	M	8303	9	6	59	0.162569498690438
north	correct_old	45-north	1989	3	9	DAR-north	0	1	0	NA	M	7207	9	6	59	0.162569498690438
north	correct_old	45-north	1989	3	9	ALI-north	0	0	0	NA	M	3555	9	6	59	0.162569498690438
north	correct_old	45-north	1989	3	9	TAR-north	0	0	0	NA	M	1849	9	6	59	0.162569498690438
north	correct_old	45-north	1989	3	9	BRA-north	0	0	0	NA	M	1698	9	6	59	0.162569498690438
north	correct_old	45-north	1989	3	9	SAL-north	0	1	1	high	F	11225	9	6	59	0.162569498690438
north	correct_old	45-north	1989	3	9	OND-north	0	1	1	high	F	12686	9	6	59	0.162569498690438
north	correct_old	45-north	1989	3	9	SAR-north	0	1	0	NA	M	3189	9	6	59	0.162569498690438
north	correct_old	45-north	1989	3	9	GAL-north	0	0	0	middle	F	9033	9	6	59	0.162569498690438
north	correct_old	45-north	1989	3	9	IMI-north	1	0	0	NA	F	4650	9	6	59	0.162569498690438
north	correct_old	45-north	1989	3	9	PER-north	0	1	0	NA	F	4650	9	6	59	0.162569498690438
north	correct_old	45-north	1989	3	9	ELL-north	0	0	1	high	F	11955	9	6	59	0.162569498690438
north	correct_old	45-north	1989	3	9	FIT-north	0	0	0	NA	M	5016	9	6	59	0.162569498690438
north	correct_old	45-north	1989	3	9	GER-north	0	0	0	NA	M	2094	9	6	59	0.162569498690438
north	correct_old	45-north	1989	3	9	MAL-north	0	1	1	high	F	6477	9	6	59	0.162569498690438
north	correct_old	45-north	1989	3	9	CAS-north	0	0	0	NA	F	4650	9	6	59	0.162569498690438
north	correct_old	45-north	1989	3	9	NOV-north	0	1	0	high	F	8303	9	6	59	0.162569498690438
north	correct_old	45-north	1989	3	9	MYS-north	0	0	1	high	F	5016	9	6	59	0.162569498690438
north	correct_old	45-north	1989	3	9	XER-north	0	1	0	low	F	6842	9	6	59	0.162569498690438
north	correct_old	45-north	1989	3	9	POU-north	0	1	1	high	F	5746	9	6	59	0.162569498690438
north	correct_old	46-north	1989	3	30	KEN-north	0	0	0	NA	M	7228	11	6	59	0.162569498690438
north	correct_old	46-north	1989	3	30	DAR-north	0	1	0	NA	M	7228	11	6	59	0.162569498690438
north	correct_old	46-north	1989	3	30	BRU-north	0	1	0	NA	M	13803	11	6	59	0.162569498690438
north	correct_old	46-north	1989	3	30	MAC-north	0	1	0	NA	M	9054	11	6	59	0.162569498690438
north	correct_old	46-north	1989	3	30	ROU-north	0	1	0	NA	M	8324	11	6	59	0.162569498690438
north	correct_old	46-north	1989	3	30	ALI-north	0	1	0	NA	M	3576	11	6	59	0.162569498690438
north	correct_old	46-north	1989	3	30	TAR-north	0	1	0	NA	M	1870	11	6	59	0.162569498690438
north	correct_old	46-north	1989	3	30	SAR-north	0	1	0	NA	M	3210	11	6	59	0.162569498690438
north	correct_old	46-north	1989	3	30	SAL-north	0	1	1	high	F	11246	11	6	59	0.162569498690438
north	correct_old	46-north	1989	3	30	OND-north	0	1	1	high	F	12707	11	6	59	0.162569498690438
north	correct_old	46-north	1989	3	30	POU-north	0	1	1	high	F	5767	11	6	59	0.162569498690438
north	correct_old	46-north	1989	3	30	MYS-north	0	0	1	high	F	5037	11	6	59	0.162569498690438
north	correct_old	46-north	1989	3	30	BIJ-north	0	0	0	middle	F	5037	11	6	59	0.162569498690438
north	correct_old	46-north	1989	3	30	ELL-north	0	0	1	high	F	11976	11	6	59	0.162569498690438
north	correct_old	46-north	1989	3	30	GER-north	0	0	0	NA	M	2115	11	6	59	0.162569498690438
north	correct_old	46-north	1989	3	30	FIT-north	0	0	0	NA	M	5037	11	6	59	0.162569498690438
north	correct_old	46-north	1989	3	30	ULY-north	0	1	0	NA	M	8324	11	6	59	0.162569498690438
north	correct_old	46-north	1989	3	30	BRA-north	0	0	0	NA	M	1719	11	6	59	0.162569498690438
north	correct_old	46-north	1989	3	30	GIT-north	0	1	0	middle	F	14533	11	6	59	0.162569498690438
north	correct_old	46-north	1989	3	30	GOM-north	0	1	0	middle	F	5767	11	6	59	0.162569498690438
north	correct_old	46-north	1989	3	30	MAL-north	0	0	1	high	F	6498	11	6	59	0.162569498690438
north	correct_old	46-north	1989	3	30	GIP-north	0	0	0	NA	M	3088	11	6	59	0.162569498690438
north	correct_old	46-north	1989	3	30	GOY-north	0	0	0	NA	F	1354	11	6	59	0.162569498690438
north	correct_old	46-north	1989	3	30	NOV-north	0	0	0	high	F	8324	11	6	59	0.162569498690438
north	correct_old	46-north	1989	3	30	HER-north	0	1	1	middle	F	8689	11	6	59	0.162569498690438
north	correct_old	47-north	1989	4	1	KEN-north	0	1	0	NA	M	7230	10	2	59	0.1759703035429
north	correct_old	47-north	1989	4	1	FIT-north	0	1	0	NA	M	5039	10	2	59	0.1759703035429
north	correct_old	47-north	1989	4	1	ELL-north	0	1	1	high	F	11978	10	2	59	0.1759703035429
north	correct_old	47-north	1989	4	1	DAR-north	0	1	0	NA	M	7230	10	2	59	0.1759703035429
north	correct_old	47-north	1989	4	1	GAL-north	0	0	0	middle	F	9056	10	2	59	0.1759703035429
north	correct_old	47-north	1989	4	1	POK-north	0	0	1	low	F	11978	10	2	59	0.1759703035429
north	correct_old	47-north	1989	4	1	LOU-north	0	0	0	high	F	6134	10	2	59	0.1759703035429
north	correct_old	47-north	1989	4	1	SAL-north	0	1	1	high	F	11248	10	2	59	0.1759703035429
north	correct_old	47-north	1989	4	1	OND-north	0	1	1	high	F	12709	10	2	59	0.1759703035429
north	correct_old	47-north	1989	4	1	BIJ-north	0	0	0	middle	F	5039	10	2	59	0.1759703035429
north	correct_old	47-north	1989	4	1	MYS-north	0	0	1	high	F	5039	10	2	59	0.1759703035429
north	correct_old	47-north	1989	4	1	SAR-north	0	1	0	NA	M	3212	10	2	59	0.1759703035429
north	correct_old	47-north	1989	4	1	HER-north	0	0	1	middle	F	8691	10	2	59	0.1759703035429
north	correct_old	47-north	1989	4	1	GER-north	0	1	0	NA	M	2117	10	2	59	0.1759703035429
north	correct_old	47-north	1989	4	1	NOV-north	0	0	0	high	F	8326	10	2	59	0.1759703035429
north	correct_old	48-north	1989	4	25	XER-north	0	1	0	low	F	6889	2	1	59	0.1759703035429
north	correct_old	48-north	1989	4	25	GIT-north	0	1	0	middle	F	14559	2	1	59	0.1759703035429
north	correct_old	48-north	1989	4	25	GOY-north	0	1	0	NA	F	1380	2	1	59	0.1759703035429
north	correct_old	48-north	1989	4	25	GIP-north	0	1	0	NA	M	3114	2	1	59	0.1759703035429
north	correct_old	48-north	1989	4	25	MAC-north	0	1	0	NA	M	9080	2	1	59	0.1759703035429
north	correct_old	48-north	1989	4	25	ALI-north	0	1	0	NA	M	3602	2	1	59	0.1759703035429
north	correct_old	49-north	1989	5	5	BRU-north	0	1	0	NA	M	13839	10	4	59	0.194730284712288
north	correct_old	49-north	1989	5	5	ULY-north	0	0	0	NA	M	8360	10	4	59	0.194730284712288
north	correct_old	49-north	1989	5	5	MAC-north	0	1	0	NA	M	9090	10	4	59	0.194730284712288
north	correct_old	49-north	1989	5	5	DAR-north	0	1	0	NA	M	7264	10	4	59	0.194730284712288
north	correct_old	49-north	1989	5	5	OND-north	0	0	1	high	F	12743	10	4	59	0.194730284712288
north	correct_old	49-north	1989	5	5	SAL-north	0	0	1	high	F	11282	10	4	59	0.194730284712288
north	correct_old	49-north	1989	5	5	SAR-north	0	0	0	NA	M	3246	10	4	59	0.194730284712288
north	correct_old	49-north	1989	5	5	ALI-north	0	1	0	NA	M	3612	10	4	59	0.194730284712288
north	correct_old	49-north	1989	5	5	TAR-north	0	1	0	NA	M	1906	10	4	59	0.194730284712288
north	correct_old	49-north	1989	5	5	GIT-north	0	1	0	middle	F	14569	10	4	59	0.194730284712288
north	correct_old	49-north	1989	5	5	NOV-north	0	1	0	high	F	8360	10	4	59	0.194730284712288
north	correct_old	49-north	1989	5	5	LOU-north	0	1	0	high	F	6168	10	4	59	0.194730284712288
north	correct_old	49-north	1989	5	5	AGA-north	1	0	0	NA	F	4342	10	4	59	0.194730284712288
north	correct_old	49-north	1989	5	5	KIR-north	0	0	1	middle	F	7264	10	4	59	0.194730284712288
north	correct_old	49-north	1989	5	5	BON-north	1	0	0	NA	F	4342	10	4	59	0.194730284712288
north	correct_old	49-north	1989	5	5	XER-north	0	1	0	low	F	6899	10	4	59	0.194730284712288
north	correct_old	49-north	1989	5	5	MYS-north	0	1	1	high	F	5073	10	4	59	0.194730284712288
north	correct_old	49-north	1989	5	5	HER-north	0	1	1	middle	F	8725	10	4	59	0.194730284712288
north	correct_old	49-north	1989	5	5	GOM-north	0	1	0	middle	F	5803	10	4	59	0.194730284712288
north	correct_old	49-north	1989	5	5	FIT-north	0	1	0	NA	M	5073	10	4	59	0.194730284712288
north	correct_old	50-north	1989	6	6	GAL-north	0	1	0	middle	F	9122	5	0	60	0.240790370202135
north	correct_old	50-north	1989	6	6	LOU-north	0	1	0	high	F	6200	5	0	60	0.240790370202135
north	correct_old	50-north	1989	6	6	HER-north	0	1	1	middle	F	8757	5	0	60	0.240790370202135
north	correct_old	50-north	1989	6	6	ELL-north	0	1	1	high	F	12044	5	0	60	0.240790370202135
north	correct_old	50-north	1989	6	6	XER-north	0	1	0	low	F	6931	5	0	60	0.240790370202135
north	correct_old	51-north	1989	6	10	BRU-north	0	1	0	NA	M	13875	9	4	60	0.240790370202135
north	correct_old	51-north	1989	6	10	ALI-north	0	1	0	NA	M	3648	9	4	60	0.240790370202135
north	correct_old	51-north	1989	6	10	ULY-north	0	1	0	NA	M	8396	9	4	60	0.240790370202135
north	correct_old	51-north	1989	6	10	LOU-north	0	1	0	high	F	6204	9	4	60	0.240790370202135
north	correct_old	51-north	1989	6	10	OND-north	0	1	1	high	F	12779	9	4	60	0.240790370202135
north	correct_old	51-north	1989	6	10	SAR-north	0	1	0	NA	M	3282	9	4	60	0.240790370202135
north	correct_old	51-north	1989	6	10	TAR-north	0	1	0	NA	M	1942	9	4	60	0.240790370202135
north	correct_old	51-north	1989	6	10	NOV-north	0	1	1	high	F	8396	9	4	60	0.240790370202135
north	correct_old	51-north	1989	6	10	MAC-north	0	1	0	NA	M	9126	9	4	60	0.240790370202135
north	correct_old	51-north	1989	6	10	ROU-north	0	0	0	NA	M	8396	9	4	60	0.240790370202135
north	correct_old	51-north	1989	6	10	SAL-north	0	1	1	high	F	11318	9	4	60	0.240790370202135
north	correct_old	51-north	1989	6	10	MYS-north	0	1	1	high	F	5109	9	4	60	0.240790370202135
north	correct_old	51-north	1989	6	10	POU-north	0	1	1	high	F	5839	9	4	60	0.240790370202135
north	correct_old	51-north	1989	6	10	MAL-north	0	1	1	high	F	6570	9	4	60	0.240790370202135
north	correct_old	51-north	1989	6	10	GOM-north	0	1	0	middle	F	5839	9	4	60	0.240790370202135
north	correct_old	51-north	1989	6	10	BIJ-north	0	1	0	middle	F	5109	9	4	60	0.240790370202135
north	correct_old	52-north	1989	8	22	DAR-north	0	0	0	NA	M	7373	4	4	61	0.242119847592657
north	correct_old	52-north	1989	8	22	ROU-north	0	0	0	NA	M	8469	4	4	61	0.242119847592657
north	correct_old	52-north	1989	8	22	TAR-north	0	0	0	NA	M	2015	4	4	61	0.242119847592657
north	correct_old	52-north	1989	8	22	DIL-north	0	0	0	NA	F	4086	4	4	61	0.242119847592657
north	correct_old	52-north	1989	8	22	VEN-north	1	0	0	NA	F	4086	4	4	61	0.242119847592657
north	correct_old	52-north	1989	8	22	AGA-north	1	0	0	NA	F	4451	4	4	61	0.242119847592657
north	correct_old	52-north	1989	8	22	ALI-north	0	0	0	NA	M	3721	4	4	61	0.242119847592657
north	correct_old	52-north	1989	8	22	MYS-north	1	1	1	high	F	5182	4	4	61	0.242119847592657
north	correct_old	52-north	1989	8	22	MAC-north	0	1	0	NA	M	9199	4	4	61	0.242119847592657
north	correct_old	52-north	1989	8	22	BRU-north	0	0	0	NA	M	13948	4	4	61	0.242119847592657
north	correct_old	52-north	1989	8	22	IMI-north	0	0	0	low	F	4816	4	4	61	0.242119847592657
north	correct_old	52-north	1989	8	22	CAS-north	1	1	0	low	F	4816	4	4	61	0.242119847592657
north	correct_old	52-north	1989	8	22	PER-north	0	1	0	low	F	4816	4	4	61	0.242119847592657
north	correct_old	53-north	1989	8	27	ROU-north	0	1	0	NA	M	8474	1	2	61	0.242119847592657
north	correct_old	53-north	1989	8	27	ULY-north	0	1	0	NA	M	8474	1	2	61	0.242119847592657
north	correct_old	53-north	1989	8	27	BON-north	0	1	0	NA	F	4456	1	2	61	0.242119847592657
north	correct_old	53-north	1989	8	27	XER-north	0	1	0	low	F	7013	1	2	61	0.242119847592657
north	correct_old	53-north	1989	8	27	XIN-north	0	1	0	NA	F	1838	1	2	61	0.242119847592657
north	correct_old	54-north	1989	9	2	KEN-north	0	1	0	NA	M	7384	5	5	61	0.285023355793477
north	correct_old	54-north	1989	9	2	BRU-north	0	1	0	NA	M	13959	5	5	61	0.285023355793477
north	correct_old	54-north	1989	9	2	LOU-north	0	1	0	high	F	6288	5	5	61	0.285023355793477
north	correct_old	54-north	1989	9	2	OND-north	0	1	1	high	F	12863	5	5	61	0.285023355793477
north	correct_old	54-north	1989	9	2	SAL-north	0	1	1	high	F	11402	5	5	61	0.285023355793477
north	correct_old	54-north	1989	9	2	ULY-north	0	1	0	NA	M	8480	5	5	61	0.285023355793477
north	correct_old	54-north	1989	9	2	ALI-north	0	1	0	NA	M	3732	5	5	61	0.285023355793477
north	correct_old	54-north	1989	9	2	TAR-north	0	1	0	NA	M	2026	5	5	61	0.285023355793477
north	correct_old	54-north	1989	9	2	DAR-north	0	1	0	NA	M	7384	5	5	61	0.285023355793477
north	correct_old	54-north	1989	9	2	ROU-north	0	1	0	NA	M	8480	5	5	61	0.285023355793477
north	correct_old	54-north	1989	9	2	SAR-north	0	1	0	NA	M	3366	5	5	61	0.285023355793477
north	correct_old	54-north	1989	9	2	FOS-north	0	0	0	NA	F	3732	5	5	61	0.285023355793477
north	correct_old	54-north	1989	9	2	LYC-north	0	1	0	NA	F	1281	5	5	61	0.285023355793477
north	correct_old	54-north	1989	9	2	GIT-north	0	1	0	middle	F	14689	5	5	61	0.285023355793477
north	correct_old	54-north	1989	9	2	SIM-north	0	0	0	NA	F	576	5	5	61	0.285023355793477
north	correct_old	54-north	1989	9	2	VEN-north	1	0	0	NA	F	4097	5	5	61	0.285023355793477
north	correct_old	54-north	1989	9	2	PER-north	0	1	0	low	F	4827	5	5	61	0.285023355793477
north	correct_old	54-north	1989	9	2	BRA-north	0	0	0	NA	M	1875	5	5	61	0.285023355793477
north	correct_old	55-north	1989	9	4	PER-north	0	0	0	low	F	4829	2	5	61	0.285023355793477
north	correct_old	55-north	1989	9	4	DIL-north	0	0	0	NA	F	4099	2	5	61	0.285023355793477
north	correct_old	55-north	1989	9	4	CAS-north	1	0	0	low	F	4829	2	5	61	0.285023355793477
north	correct_old	55-north	1989	9	4	KEN-north	0	0	0	NA	M	7386	2	5	61	0.285023355793477
north	correct_old	55-north	1989	9	4	ULY-north	0	1	0	NA	M	8482	2	5	61	0.285023355793477
north	correct_old	55-north	1989	9	4	DAR-north	0	0	0	NA	M	7386	2	5	61	0.285023355793477
north	correct_old	55-north	1989	9	4	BRU-north	0	1	0	NA	M	13961	2	5	61	0.285023355793477
north	correct_old	55-north	1989	9	4	AGA-north	0	0	0	NA	F	4464	2	5	61	0.285023355793477
north	correct_old	55-north	1989	9	4	BRA-north	0	0	0	NA	M	1877	2	5	61	0.285023355793477
north	correct_old	55-north	1989	9	4	FOS-north	0	0	0	NA	F	3734	2	5	61	0.285023355793477
north	correct_old	55-north	1989	9	4	ROU-north	0	1	0	NA	M	8482	2	5	61	0.285023355793477
north	correct_old	55-north	1989	9	4	ALI-north	0	0	0	NA	M	3734	2	5	61	0.285023355793477
north	correct_old	55-north	1989	9	4	FIT-north	0	1	0	NA	M	5195	2	5	61	0.285023355793477
north	correct_old	55-north	1989	9	4	TAR-north	0	1	0	NA	M	2028	2	5	61	0.285023355793477
north	correct_old	56-north	1989	9	6	BRU-north	0	1	0	NA	M	13963	10	5	61	0.285023355793477
north	correct_old	56-north	1989	9	6	FIT-north	0	1	0	NA	M	5197	10	5	61	0.285023355793477
north	correct_old	56-north	1989	9	6	OND-north	0	1	1	high	F	12867	10	5	61	0.285023355793477
north	correct_old	56-north	1989	9	6	SAL-north	0	1	1	high	F	11406	10	5	61	0.285023355793477
north	correct_old	56-north	1989	9	6	MAL-north	0	1	1	high	F	6658	10	5	61	0.285023355793477
north	correct_old	56-north	1989	9	6	ULY-north	0	1	0	NA	M	8484	10	5	61	0.285023355793477
north	correct_old	56-north	1989	9	6	MAC-north	0	1	0	NA	M	9214	10	5	61	0.285023355793477
north	correct_old	56-north	1989	9	6	LOU-north	0	0	0	high	F	6292	10	5	61	0.285023355793477
north	correct_old	56-north	1989	9	6	DAR-north	0	1	0	NA	M	7388	10	5	61	0.285023355793477
north	correct_old	56-north	1989	9	6	KIR-north	0	1	0	middle	F	7388	10	5	61	0.285023355793477
north	correct_old	56-north	1989	9	6	SAR-north	0	1	0	NA	M	3370	10	5	61	0.285023355793477
north	correct_old	56-north	1989	9	6	NOV-north	0	1	1	high	F	8484	10	5	61	0.285023355793477
north	correct_old	56-north	1989	9	6	BIJ-north	1	1	0	middle	F	5197	10	5	61	0.285023355793477
north	correct_old	56-north	1989	9	6	ALI-north	0	0	0	NA	M	3736	10	5	61	0.285023355793477
north	correct_old	56-north	1989	9	6	GIT-north	0	1	0	middle	F	14693	10	5	61	0.285023355793477
north	correct_old	56-north	1989	9	6	HER-north	0	1	0	middle	F	8849	10	5	61	0.285023355793477
north	correct_old	56-north	1989	9	6	TAR-north	0	1	0	NA	M	2030	10	5	61	0.285023355793477
north	correct_old	56-north	1989	9	6	PER-north	0	0	0	low	F	4831	10	5	61	0.285023355793477
north	correct_old	56-north	1989	9	6	ROU-north	0	0	0	NA	M	8484	10	5	61	0.285023355793477
north	correct_old	56-north	1989	9	6	BRA-north	0	0	0	NA	M	1879	10	5	61	0.285023355793477
north	correct_old	57-north	1989	9	19	BRU-north	0	1	0	NA	M	13976	2	6	61	0.285023355793477
north	correct_old	57-north	1989	9	19	MAC-north	0	1	0	NA	M	9227	2	6	61	0.285023355793477
north	correct_old	57-north	1989	9	19	ROU-north	0	0	0	NA	M	8497	2	6	61	0.285023355793477
north	correct_old	57-north	1989	9	19	ULY-north	0	1	0	NA	M	8497	2	6	61	0.285023355793477
north	correct_old	57-north	1989	9	19	DAR-north	0	1	0	NA	M	7401	2	6	61	0.285023355793477
north	correct_old	57-north	1989	9	19	KEN-north	0	0	0	NA	M	7401	2	6	61	0.285023355793477
north	correct_old	57-north	1989	9	19	TAR-north	0	1	0	NA	M	2043	2	6	61	0.285023355793477
north	correct_old	57-north	1989	9	19	ALI-north	0	1	0	NA	M	3749	2	6	61	0.285023355793477
north	correct_old	57-north	1989	9	19	OND-north	0	0	1	high	F	12880	2	6	61	0.285023355793477
north	correct_old	57-north	1989	9	19	SAL-north	0	0	1	high	F	11419	2	6	61	0.285023355793477
north	correct_old	57-north	1989	9	19	BON-north	1	0	0	NA	F	4479	2	6	61	0.285023355793477
north	correct_old	57-north	1989	9	19	SAR-north	0	1	0	NA	M	3383	2	6	61	0.285023355793477
north	correct_old	58-north	1989	9	22	ULY-north	0	0	0	NA	M	8500	2	5	61	0.285023355793477
north	correct_old	58-north	1989	9	22	DAR-north	0	0	0	NA	M	7404	2	5	61	0.285023355793477
north	correct_old	58-north	1989	9	22	OND-north	0	1	1	high	F	12883	2	5	61	0.285023355793477
north	correct_old	58-north	1989	9	22	BRU-north	0	1	0	NA	M	13979	2	5	61	0.285023355793477
north	correct_old	58-north	1989	9	22	MAC-north	0	1	0	NA	M	9230	2	5	61	0.285023355793477
north	correct_old	58-north	1989	9	22	ALI-north	0	1	0	NA	M	3752	2	5	61	0.285023355793477
north	correct_old	58-north	1989	9	22	ROU-north	0	0	0	NA	M	8500	2	5	61	0.285023355793477
north	correct_old	58-north	1989	9	22	SAL-north	0	1	1	high	F	11422	2	5	61	0.285023355793477
north	correct_old	58-north	1989	9	22	SAR-north	0	1	0	NA	M	3386	2	5	61	0.285023355793477
north	correct_old	58-north	1989	9	22	TAR-north	0	1	0	NA	M	2046	2	5	61	0.285023355793477
north	correct_old	59-north	1989	9	24	BRA-north	0	0	0	NA	M	1897	8	4	61	0.285023355793477
north	correct_old	59-north	1989	9	24	SAR-north	0	1	0	NA	M	3388	8	4	61	0.285023355793477
north	correct_old	59-north	1989	9	24	ULY-north	0	1	0	NA	M	8502	8	4	61	0.285023355793477
north	correct_old	59-north	1989	9	24	MAC-north	0	1	0	NA	M	9232	8	4	61	0.285023355793477
north	correct_old	59-north	1989	9	24	ALI-north	0	0	0	NA	M	3754	8	4	61	0.285023355793477
north	correct_old	59-north	1989	9	24	OND-north	0	1	1	high	F	12885	8	4	61	0.285023355793477
north	correct_old	59-north	1989	9	24	BRU-north	0	1	0	NA	M	13981	8	4	61	0.285023355793477
north	correct_old	59-north	1989	9	24	NOV-north	0	1	1	high	F	8502	8	4	61	0.285023355793477
north	correct_old	59-north	1989	9	24	DAR-north	0	1	0	NA	M	7406	8	4	61	0.285023355793477
north	correct_old	59-north	1989	9	24	HER-north	0	1	0	middle	F	8867	8	4	61	0.285023355793477
north	correct_old	59-north	1989	9	24	GOM-north	1	1	0	middle	F	5945	8	4	61	0.285023355793477
north	correct_old	59-north	1989	9	24	SAL-north	0	1	1	high	F	11424	8	4	61	0.285023355793477
north	correct_old	59-north	1989	9	24	LOU-north	0	1	0	high	F	6310	8	4	61	0.285023355793477
north	correct_old	59-north	1989	9	24	GIT-north	0	0	0	middle	F	14711	8	4	61	0.285023355793477
north	correct_old	59-north	1989	9	24	MAL-north	0	1	1	high	F	6676	8	4	61	0.285023355793477
north	correct_old	59-north	1989	9	24	TAR-north	0	1	0	NA	M	2048	8	4	61	0.285023355793477
north	correct_old	60-north	1989	10	4	ULY-north	0	1	0	NA	M	8512	8	6	61	0.350900466312912
north	correct_old	60-north	1989	10	4	SAR-north	0	1	0	NA	M	3398	8	6	61	0.350900466312912
north	correct_old	60-north	1989	10	4	ALI-north	0	1	0	NA	M	3764	8	6	61	0.350900466312912
north	correct_old	60-north	1989	10	4	DAR-north	0	1	0	NA	M	7416	8	6	61	0.350900466312912
north	correct_old	60-north	1989	10	4	MAC-north	0	1	0	NA	M	9242	8	6	61	0.350900466312912
north	correct_old	60-north	1989	10	4	OND-north	0	1	1	high	F	12895	8	6	61	0.350900466312912
north	correct_old	60-north	1989	10	4	SAL-north	0	1	1	high	F	11434	8	6	61	0.350900466312912
north	correct_old	60-north	1989	10	4	BRA-north	0	1	0	NA	M	1907	8	6	61	0.350900466312912
north	correct_old	60-north	1989	10	4	TAR-north	0	1	0	NA	M	2058	8	6	61	0.350900466312912
north	correct_old	60-north	1989	10	4	DIL-north	0	0	0	NA	F	4129	8	6	61	0.350900466312912
north	correct_old	60-north	1989	10	4	BRU-north	0	1	0	NA	M	13991	8	6	61	0.350900466312912
north	correct_old	60-north	1989	10	4	ROU-north	0	1	0	NA	M	8512	8	6	61	0.350900466312912
north	correct_old	60-north	1989	10	4	IMI-north	1	0	0	low	F	4859	8	6	61	0.350900466312912
north	correct_old	60-north	1989	10	4	PER-north	0	1	0	low	F	4859	8	6	61	0.350900466312912
north	correct_old	60-north	1989	10	4	KEN-north	0	1	0	NA	M	7416	8	6	61	0.350900466312912
north	correct_old	60-north	1989	10	4	FIT-north	0	0	0	NA	M	5225	8	6	61	0.350900466312912
north	correct_old	60-north	1989	10	4	MYS-north	1	1	1	high	F	5225	8	6	61	0.350900466312912
north	correct_old	60-north	1989	10	4	AGA-north	0	0	0	NA	F	4494	8	6	61	0.350900466312912
north	correct_old	60-north	1989	10	4	LOU-north	0	1	0	high	F	6320	8	6	61	0.350900466312912
north	correct_old	60-north	1989	10	4	BIJ-north	1	1	0	middle	F	5225	8	6	61	0.350900466312912
north	correct_old	60-north	1989	10	4	CAS-north	1	0	0	low	F	4859	8	6	61	0.350900466312912
north	correct_old	60-north	1989	10	4	VEN-north	0	1	0	NA	F	4129	8	6	61	0.350900466312912
north	correct_old	61-north	1989	10	8	MAC-north	0	1	0	NA	M	9246	10	6	61	0.350900466312912
north	correct_old	61-north	1989	10	8	BRU-north	0	1	0	NA	M	13995	10	6	61	0.350900466312912
north	correct_old	61-north	1989	10	8	KEN-north	0	1	0	NA	M	7420	10	6	61	0.350900466312912
north	correct_old	61-north	1989	10	8	ULY-north	0	1	0	NA	M	8516	10	6	61	0.350900466312912
north	correct_old	61-north	1989	10	8	ROU-north	0	1	0	NA	M	8516	10	6	61	0.350900466312912
north	correct_old	61-north	1989	10	8	BRA-north	0	0	0	NA	M	1911	10	6	61	0.350900466312912
north	correct_old	61-north	1989	10	8	FIT-north	0	0	0	NA	M	5229	10	6	61	0.350900466312912
north	correct_old	61-north	1989	10	8	ELL-north	0	1	1	high	F	12168	10	6	61	0.350900466312912
north	correct_old	61-north	1989	10	8	GER-north	0	1	0	NA	M	2307	10	6	61	0.350900466312912
north	correct_old	61-north	1989	10	8	SAL-north	0	0	1	high	F	11438	10	6	61	0.350900466312912
north	correct_old	61-north	1989	10	8	FAN-north	0	0	0	high	F	7420	10	6	61	0.350900466312912
north	correct_old	61-north	1989	10	8	BIJ-north	1	0	0	middle	F	5229	10	6	61	0.350900466312912
north	correct_old	61-north	1989	10	8	ALI-north	0	0	0	NA	M	3768	10	6	61	0.350900466312912
north	correct_old	61-north	1989	10	8	TAR-north	0	1	0	NA	M	2062	10	6	61	0.350900466312912
north	correct_old	61-north	1989	10	8	HER-north	0	1	0	middle	F	8881	10	6	61	0.350900466312912
north	correct_old	61-north	1989	10	8	GAL-north	1	0	0	middle	F	9246	10	6	61	0.350900466312912
north	correct_old	61-north	1989	10	8	IMI-north	0	0	0	low	F	4863	10	6	61	0.350900466312912
north	correct_old	61-north	1989	10	8	NOV-north	0	1	1	high	F	8516	10	6	61	0.350900466312912
north	correct_old	61-north	1989	10	8	KIR-north	0	0	0	middle	F	7420	10	6	61	0.350900466312912
north	correct_old	61-north	1989	10	8	GIT-north	0	0	0	middle	F	14725	10	6	61	0.350900466312912
north	correct_old	61-north	1989	10	8	DAR-north	0	1	0	NA	M	7420	10	6	61	0.350900466312912
north	correct_old	62-north	1989	10	11	BRU-north	0	1	0	NA	M	13998	5	5	61	0.350900466312912
north	correct_old	62-north	1989	10	11	MAC-north	0	1	0	NA	M	9249	5	5	61	0.350900466312912
north	correct_old	62-north	1989	10	11	ROU-north	0	1	0	NA	M	8519	5	5	61	0.350900466312912
north	correct_old	62-north	1989	10	11	ULY-north	0	1	0	NA	M	8519	5	5	61	0.350900466312912
north	correct_old	62-north	1989	10	11	DAR-north	0	1	0	NA	M	7423	5	5	61	0.350900466312912
north	correct_old	62-north	1989	10	11	SAL-north	0	1	1	high	F	11441	5	5	61	0.350900466312912
north	correct_old	62-north	1989	10	11	SAR-north	0	0	0	NA	M	3405	5	5	61	0.350900466312912
north	correct_old	62-north	1989	10	11	OND-north	0	0	1	high	F	12902	5	5	61	0.350900466312912
north	correct_old	62-north	1989	10	11	GOM-north	0	0	0	middle	F	5962	5	5	61	0.350900466312912
north	correct_old	62-north	1989	10	11	AGA-north	0	0	0	NA	F	4501	5	5	61	0.350900466312912
north	correct_old	62-north	1989	10	11	BON-north	0	0	0	NA	F	4501	5	5	61	0.350900466312912
north	correct_old	62-north	1989	10	11	XER-north	0	0	0	low	F	7058	5	5	61	0.350900466312912
north	correct_old	62-north	1989	10	11	FOS-north	0	0	0	NA	F	3771	5	5	61	0.350900466312912
north	correct_old	62-north	1989	10	11	LOU-north	0	0	0	high	F	6327	5	5	61	0.350900466312912
north	correct_old	62-north	1989	10	11	TAR-north	0	0	0	NA	M	2065	5	5	61	0.350900466312912
north	correct_old	62-north	1989	10	11	BRA-north	0	0	0	NA	M	1914	5	5	61	0.350900466312912
north	correct_old	62-north	1989	10	11	CHO-north	0	0	0	NA	F	3132	5	5	61	0.350900466312912
north	correct_old	63-north	1989	10	12	ULY-north	0	1	0	NA	M	8520	13	5	61	0.350900466312912
north	correct_old	63-north	1989	10	12	BRA-north	0	0	0	NA	M	1915	13	5	61	0.350900466312912
north	correct_old	63-north	1989	10	12	MAC-north	0	1	0	NA	M	9250	13	5	61	0.350900466312912
north	correct_old	63-north	1989	10	12	BRU-north	0	1	0	NA	M	13999	13	5	61	0.350900466312912
north	correct_old	63-north	1989	10	12	ALI-north	0	1	0	NA	M	3772	13	5	61	0.350900466312912
north	correct_old	63-north	1989	10	12	SAL-north	0	1	1	high	F	11442	13	5	61	0.350900466312912
north	correct_old	63-north	1989	10	12	OND-north	0	1	1	high	F	12903	13	5	61	0.350900466312912
north	correct_old	63-north	1989	10	12	ROU-north	0	1	0	NA	M	8520	13	5	61	0.350900466312912
north	correct_old	63-north	1989	10	12	GOM-north	0	0	0	middle	F	5963	13	5	61	0.350900466312912
north	correct_old	63-north	1989	10	12	GIT-north	0	1	0	middle	F	14729	13	5	61	0.350900466312912
north	correct_old	63-north	1989	10	12	KIR-north	0	1	0	middle	F	7424	13	5	61	0.350900466312912
north	correct_old	63-north	1989	10	12	SAR-north	0	1	0	NA	M	3406	13	5	61	0.350900466312912
north	correct_old	63-north	1989	10	12	DAR-north	0	1	0	NA	M	7424	13	5	61	0.350900466312912
north	correct_old	63-north	1989	10	12	MAL-north	0	1	1	high	F	6694	13	5	61	0.350900466312912
north	correct_old	63-north	1989	10	12	NOV-north	0	1	1	high	F	8520	13	5	61	0.350900466312912
north	correct_old	63-north	1989	10	12	HER-north	0	0	0	middle	F	8885	13	5	61	0.350900466312912
north	correct_old	63-north	1989	10	12	ELL-north	0	1	1	high	F	12172	13	5	61	0.350900466312912
north	correct_old	63-north	1989	10	12	FIT-north	0	1	0	NA	M	5233	13	5	61	0.350900466312912
north	correct_old	63-north	1989	10	12	IMI-north	0	1	0	low	F	4867	13	5	61	0.350900466312912
north	correct_old	63-north	1989	10	12	FAN-north	0	1	0	high	F	7424	13	5	61	0.350900466312912
north	correct_old	63-north	1989	10	12	MAR-north	0	1	0	NA	M	2737	13	5	61	0.350900466312912
north	correct_old	63-north	1989	10	12	TAR-north	0	1	0	NA	M	2066	13	5	61	0.350900466312912
north	correct_old	63-north	1989	10	12	GAL-north	1	0	0	middle	F	9250	13	5	61	0.350900466312912
north	correct_old	63-north	1989	10	12	GIP-north	0	1	0	NA	M	3284	13	5	61	0.350900466312912
north	correct_old	63-north	1989	10	12	GOY-north	0	1	0	NA	F	1550	13	5	61	0.350900466312912
north	correct_old	63-north	1989	10	12	POU-north	0	1	1	high	F	5963	13	5	61	0.350900466312912
north	correct_old	63-north	1989	10	12	AGA-north	0	1	0	NA	F	4502	13	5	61	0.350900466312912
north	correct_old	64-north	1989	10	15	DAR-north	0	1	0	NA	M	7427	5	5	61	0.350900466312912
north	correct_old	64-north	1989	10	15	BRA-north	0	0	0	NA	M	1918	5	5	61	0.350900466312912
north	correct_old	64-north	1989	10	15	ULY-north	0	1	0	NA	M	8523	5	5	61	0.350900466312912
north	correct_old	64-north	1989	10	15	DIL-north	1	0	0	NA	F	4140	5	5	61	0.350900466312912
north	correct_old	64-north	1989	10	15	AGA-north	0	0	0	NA	F	4505	5	5	61	0.350900466312912
north	correct_old	64-north	1989	10	15	PER-north	0	1	0	low	F	4870	5	5	61	0.350900466312912
north	correct_old	64-north	1989	10	15	MAC-north	0	1	0	NA	M	9253	5	5	61	0.350900466312912
north	correct_old	64-north	1989	10	15	BRU-north	0	1	0	NA	M	14002	5	5	61	0.350900466312912
north	correct_old	64-north	1989	10	15	TAR-north	0	1	0	NA	M	2069	5	5	61	0.350900466312912
north	correct_old	64-north	1989	10	15	OND-north	0	1	1	high	F	12906	5	5	61	0.350900466312912
north	correct_old	64-north	1989	10	15	SAL-north	0	1	1	high	F	11445	5	5	61	0.350900466312912
north	correct_old	64-north	1989	10	15	ROU-north	0	1	0	NA	M	8523	5	5	61	0.350900466312912
north	correct_old	64-north	1989	10	15	ALI-north	0	1	0	NA	M	3775	5	5	61	0.350900466312912
north	correct_old	64-north	1989	10	15	SAR-north	0	1	0	NA	M	3409	5	5	61	0.350900466312912
north	correct_old	64-north	1989	10	15	KIR-north	0	1	0	middle	F	7427	5	5	61	0.350900466312912
north	correct_old	64-north	1989	10	15	POU-north	0	1	1	high	F	5966	5	5	61	0.350900466312912
north	correct_old	64-north	1989	10	15	FOS-north	1	0	0	NA	F	3775	5	5	61	0.350900466312912
north	correct_old	65-north	1989	11	1	FIT-north	0	1	0	NA	M	5253	3	0	62	0.357476350939873
north	correct_old	65-north	1989	11	1	POK-north	0	1	1	low	F	12192	3	0	62	0.357476350939873
north	correct_old	65-north	1989	11	1	BEL-north	0	1	0	middle	F	5008	3	0	62	0.357476350939873
north	correct_old	65-north	1989	11	1	FOS-north	0	0	0	NA	F	3792	3	0	62	0.357476350939873
north	correct_old	65-north	1989	11	1	LOU-north	0	0	0	high	F	6348	3	0	62	0.357476350939873
north	correct_old	66-north	1989	11	5	BRU-north	0	1	0	NA	M	14023	5	4	62	0.357476350939873
north	correct_old	66-north	1989	11	5	ALI-north	0	1	0	NA	M	3796	5	4	62	0.357476350939873
north	correct_old	66-north	1989	11	5	MAC-north	0	1	0	NA	M	9274	5	4	62	0.357476350939873
north	correct_old	66-north	1989	11	5	SAL-north	0	1	1	high	F	11466	5	4	62	0.357476350939873
north	correct_old	66-north	1989	11	5	NOV-north	0	1	1	high	F	8544	5	4	62	0.357476350939873
north	correct_old	66-north	1989	11	5	ROU-north	0	1	0	NA	M	8544	5	4	62	0.357476350939873
north	correct_old	66-north	1989	11	5	OND-north	0	1	1	high	F	12927	5	4	62	0.357476350939873
north	correct_old	66-north	1989	11	5	ULY-north	0	1	0	NA	M	8544	5	4	62	0.357476350939873
north	correct_old	66-north	1989	11	5	ELL-north	0	1	1	high	F	12196	5	4	62	0.357476350939873
north	correct_old	66-north	1989	11	5	BIJ-north	1	1	0	middle	F	5257	5	4	62	0.357476350939873
north	correct_old	66-north	1989	11	5	GER-north	0	1	0	NA	M	2335	5	4	62	0.357476350939873
north	correct_old	67-north	1989	11	21	ALI-north	0	1	0	NA	M	3812	7	5	62	0.357476350939873
north	correct_old	67-north	1989	11	21	DAR-north	0	1	0	NA	M	7464	7	5	62	0.357476350939873
north	correct_old	67-north	1989	11	21	NOV-north	0	1	1	high	F	8560	7	5	62	0.357476350939873
north	correct_old	67-north	1989	11	21	GAL-north	1	1	0	middle	F	9290	7	5	62	0.357476350939873
north	correct_old	67-north	1989	11	21	FIT-north	0	1	0	NA	M	5273	7	5	62	0.357476350939873
north	correct_old	67-north	1989	11	21	ELL-north	0	1	1	high	F	12212	7	5	62	0.357476350939873
north	correct_old	67-north	1989	11	21	HER-north	0	1	0	middle	F	8925	7	5	62	0.357476350939873
north	correct_old	67-north	1989	11	21	ULY-north	0	0	0	NA	M	8560	7	5	62	0.357476350939873
north	correct_old	67-north	1989	11	21	ROU-north	0	0	0	NA	M	8560	7	5	62	0.357476350939873
north	correct_old	67-north	1989	11	21	MAC-north	0	0	0	NA	M	9290	7	5	62	0.357476350939873
north	correct_old	67-north	1989	11	21	GER-north	0	1	0	NA	M	2351	7	5	62	0.357476350939873
north	correct_old	67-north	1989	11	21	SAL-north	0	0	1	high	F	11482	7	5	62	0.357476350939873
north	correct_old	67-north	1989	11	21	OND-north	0	0	0	high	F	12943	7	5	62	0.357476350939873
north	correct_old	67-north	1989	11	21	TAR-north	0	0	0	NA	M	2106	7	5	62	0.357476350939873
north	correct_old	67-north	1989	11	21	GIT-north	0	0	0	middle	F	14769	7	5	62	0.357476350939873
north	correct_old	67-north	1989	11	21	BRU-north	0	1	0	NA	M	14039	7	5	62	0.357476350939873
north	correct_old	68-north	1990	9	8	FOS-north	1	0	0	NA	F	4103	0	5	48	0.285023355793477
north	correct_old	68-north	1990	9	8	FIT-north	0	1	0	NA	M	5564	0	5	48	0.285023355793477
north	correct_old	68-north	1990	9	8	KEN-north	0	0	0	NA	M	7755	0	5	48	0.285023355793477
north	correct_old	68-north	1990	9	8	BRU-north	0	1	0	NA	M	14330	0	5	48	0.285023355793477
north	correct_old	68-north	1990	9	8	TAR-north	0	1	0	NA	M	2397	0	5	48	0.285023355793477
north	correct_old	68-north	1990	9	8	GER-north	0	1	0	NA	M	2642	0	5	48	0.285023355793477
north	correct_old	68-north	1990	9	8	ROU-north	0	1	0	NA	M	8851	0	5	48	0.285023355793477
north	correct_old	68-north	1990	9	8	SAR-north	0	0	0	NA	M	3737	0	5	48	0.285023355793477
north	correct_old	68-north	1990	9	8	DAR-north	0	0	0	NA	M	7755	0	5	48	0.285023355793477
north	correct_old	69-north	1990	9	9	KEN-north	0	1	0	NA	M	7756	2	4	48	0.285023355793477
north	correct_old	69-north	1990	9	9	BRU-north	0	1	0	NA	M	14331	2	4	48	0.285023355793477
north	correct_old	69-north	1990	9	9	SAR-north	0	1	0	NA	M	3738	2	4	48	0.285023355793477
north	correct_old	69-north	1990	9	9	ROU-north	0	1	0	NA	M	8852	2	4	48	0.285023355793477
north	correct_old	69-north	1990	9	9	TAR-north	0	1	0	NA	M	2398	2	4	48	0.285023355793477
north	correct_old	69-north	1990	9	9	FIT-north	0	0	0	NA	M	5565	2	4	48	0.285023355793477
north	correct_old	69-north	1990	9	9	GER-north	0	0	0	NA	M	2643	2	4	48	0.285023355793477
north	correct_old	69-north	1990	9	9	ALI-north	0	0	0	NA	M	4104	2	4	48	0.285023355793477
north	correct_old	69-north	1990	9	9	BRA-north	0	0	0	NA	M	2247	2	4	48	0.285023355793477
north	correct_old	69-north	1990	9	9	FOS-north	1	1	0	NA	F	4104	2	4	48	0.285023355793477
north	correct_old	69-north	1990	9	9	OND-north	0	1	0	high	F	13235	2	4	48	0.285023355793477
north	correct_old	69-north	1990	9	9	GOM-north	0	0	0	middle	F	6295	2	4	48	0.285023355793477
north	correct_old	70-north	1990	9	12	OND-north	0	0	0	high	F	13238	1	4	48	0.285023355793477
north	correct_old	70-north	1990	9	12	SAR-north	0	0	0	NA	M	3741	1	4	48	0.285023355793477
north	correct_old	70-north	1990	9	12	TIN-north	0	0	0	NA	F	4107	1	4	48	0.285023355793477
north	correct_old	70-north	1990	9	12	MAC-north	0	1	0	NA	M	9585	1	4	48	0.285023355793477
north	correct_old	70-north	1990	9	12	KEN-north	0	1	0	NA	M	7759	1	4	48	0.285023355793477
north	correct_old	70-north	1990	9	12	ROU-north	0	1	0	NA	M	8855	1	4	48	0.285023355793477
north	correct_old	70-north	1990	9	12	FIT-north	0	1	0	NA	M	5568	1	4	48	0.285023355793477
north	correct_old	70-north	1990	9	12	GER-north	0	1	0	NA	M	2646	1	4	48	0.285023355793477
north	correct_old	71-north	1990	9	13	KEN-north	0	1	0	NA	M	7760	0	4	48	0.285023355793477
north	correct_old	71-north	1990	9	13	MAC-north	0	1	0	NA	M	9586	0	4	48	0.285023355793477
north	correct_old	71-north	1990	9	13	FIT-north	0	1	0	NA	M	5569	0	4	48	0.285023355793477
north	correct_old	71-north	1990	9	13	ROU-north	0	1	0	NA	M	8856	0	4	48	0.285023355793477
north	correct_old	71-north	1990	9	13	GER-north	0	1	0	NA	M	2647	0	4	48	0.285023355793477
north	correct_old	72-north	1990	9	15	FIT-north	0	1	0	NA	M	5571	2	4	48	0.285023355793477
north	correct_old	72-north	1990	9	15	GIT-north	0	0	0	middle	F	15067	2	4	48	0.285023355793477
north	correct_old	72-north	1990	9	15	GIP-north	0	0	0	NA	M	3622	2	4	48	0.285023355793477
north	correct_old	72-north	1990	9	15	MAC-north	0	0	0	NA	M	9588	2	4	48	0.285023355793477
north	correct_old	72-north	1990	9	15	ROU-north	0	0	0	NA	M	8858	2	4	48	0.285023355793477
north	correct_old	72-north	1990	9	15	KEN-north	0	0	0	NA	M	7762	2	4	48	0.285023355793477
north	correct_old	72-north	1990	9	15	GER-north	0	0	0	NA	M	2649	2	4	48	0.285023355793477
north	correct_old	72-north	1990	9	15	BIJ-north	0	0	0	middle	F	5571	2	4	48	0.285023355793477
north	correct_old	73-north	1990	9	16	KEN-north	0	1	0	NA	M	7763	1	4	48	0.285023355793477
north	correct_old	73-north	1990	9	16	MAC-north	0	1	0	NA	M	9589	1	4	48	0.285023355793477
north	correct_old	73-north	1990	9	16	FIT-north	0	1	0	NA	M	5572	1	4	48	0.285023355793477
north	correct_old	73-north	1990	9	16	ROU-north	0	1	0	NA	M	8859	1	4	48	0.285023355793477
north	correct_old	73-north	1990	9	16	GER-north	0	1	0	NA	M	2650	1	4	48	0.285023355793477
north	correct_old	73-north	1990	9	16	BIJ-north	0	1	0	middle	F	5572	1	4	48	0.285023355793477
north	correct_old	74-north	1990	9	17	KEN-north	0	0	0	NA	M	7764	1	4	48	0.285023355793477
north	correct_old	74-north	1990	9	17	MAC-north	0	1	0	NA	M	9590	1	4	48	0.285023355793477
north	correct_old	74-north	1990	9	17	FIT-north	0	1	0	NA	M	5573	1	4	48	0.285023355793477
north	correct_old	74-north	1990	9	17	ROU-north	0	1	0	NA	M	8860	1	4	48	0.285023355793477
north	correct_old	74-north	1990	9	17	GER-north	0	0	0	NA	M	2651	1	4	48	0.285023355793477
north	correct_old	74-north	1990	9	17	BIJ-north	0	1	0	middle	F	5573	1	4	48	0.285023355793477
north	correct_old	75-north	1990	9	17	KEN-north	0	0	0	NA	M	7764	1	4	48	0.285023355793477
north	correct_old	75-north	1990	9	17	MAC-north	0	0	0	NA	M	9590	1	4	48	0.285023355793477
north	correct_old	75-north	1990	9	17	FIT-north	0	1	0	NA	M	5573	1	4	48	0.285023355793477
north	correct_old	75-north	1990	9	17	ROU-north	0	0	0	NA	M	8860	1	4	48	0.285023355793477
north	correct_old	75-north	1990	9	17	GER-north	0	1	0	NA	M	2651	1	4	48	0.285023355793477
north	correct_old	75-north	1990	9	17	BIJ-north	0	0	0	middle	F	5573	1	4	48	0.285023355793477
north	correct_old	76-north	1990	9	18	KEN-north	0	1	0	NA	M	7765	1	4	48	0.285023355793477
north	correct_old	76-north	1990	9	18	MAC-north	0	1	0	NA	M	9591	1	4	48	0.285023355793477
north	correct_old	76-north	1990	9	18	FIT-north	0	1	0	NA	M	5574	1	4	48	0.285023355793477
north	correct_old	76-north	1990	9	18	ROU-north	0	1	0	NA	M	8861	1	4	48	0.285023355793477
north	correct_old	76-north	1990	9	18	GER-north	0	1	0	NA	M	2652	1	4	48	0.285023355793477
north	correct_old	76-north	1990	9	18	BIJ-north	0	1	0	middle	F	5574	1	4	48	0.285023355793477
north	correct_old	77-north	1990	9	18	KEN-north	0	0	0	NA	M	7765	1	4	48	0.285023355793477
north	correct_old	77-north	1990	9	18	MAC-north	0	1	0	NA	M	9591	1	4	48	0.285023355793477
north	correct_old	77-north	1990	9	18	FIT-north	0	0	0	NA	M	5574	1	4	48	0.285023355793477
north	correct_old	77-north	1990	9	18	ROU-north	0	1	0	NA	M	8861	1	4	48	0.285023355793477
north	correct_old	77-north	1990	9	18	GER-north	0	0	0	NA	M	2652	1	4	48	0.285023355793477
north	correct_old	77-north	1990	9	18	BIJ-north	0	1	0	middle	F	5574	1	4	48	0.285023355793477
north	correct_old	78-north	1990	9	20	FOS-north	1	0	0	NA	F	4115	2	6	48	0.285023355793477
north	correct_old	78-north	1990	9	20	DIL-north	1	0	0	NA	F	4480	2	6	48	0.285023355793477
north	correct_old	78-north	1990	9	20	KEN-north	0	0	0	NA	M	7767	2	6	48	0.285023355793477
north	correct_old	78-north	1990	9	20	FIT-north	0	0	0	NA	M	5576	2	6	48	0.285023355793477
north	correct_old	78-north	1990	9	20	POU-north	0	1	0	high	F	6306	2	6	48	0.285023355793477
north	correct_old	78-north	1990	9	20	GER-north	0	0	0	NA	M	2654	2	6	48	0.285023355793477
north	correct_old	78-north	1990	9	20	BRU-north	0	1	0	NA	M	14342	2	6	48	0.285023355793477
north	correct_old	78-north	1990	9	20	ULY-north	0	1	0	NA	M	8863	2	6	48	0.285023355793477
north	correct_old	78-north	1990	9	20	MAC-north	0	1	0	NA	M	9593	2	6	48	0.285023355793477
north	correct_old	78-north	1990	9	20	ALI-north	0	1	0	NA	M	4115	2	6	48	0.285023355793477
north	correct_old	78-north	1990	9	20	TAR-north	0	0	0	NA	M	2409	2	6	48	0.285023355793477
north	correct_old	78-north	1990	9	20	ROU-north	0	1	0	NA	M	8863	2	6	48	0.285023355793477
north	correct_old	78-north	1990	9	20	AGA-north	0	0	0	low	F	4845	2	6	48	0.285023355793477
north	correct_old	79-north	1990	9	21	MAC-north	0	1	0	NA	M	9594	4	6	48	0.285023355793477
north	correct_old	79-north	1990	9	21	ULY-north	0	1	0	NA	M	8864	4	6	48	0.285023355793477
north	correct_old	79-north	1990	9	21	KEN-north	0	0	0	NA	M	7768	4	6	48	0.285023355793477
north	correct_old	79-north	1990	9	21	FOS-north	1	0	0	NA	F	4116	4	6	48	0.285023355793477
north	correct_old	79-north	1990	9	21	FIT-north	0	1	0	NA	M	5577	4	6	48	0.285023355793477
north	correct_old	79-north	1990	9	21	GER-north	0	1	0	NA	M	2655	4	6	48	0.285023355793477
north	correct_old	79-north	1990	9	21	BRU-north	0	1	0	NA	M	14343	4	6	48	0.285023355793477
north	correct_old	79-north	1990	9	21	ROU-north	0	0	0	NA	M	8864	4	6	48	0.285023355793477
north	correct_old	79-north	1990	9	21	ALI-north	0	1	0	NA	M	4116	4	6	48	0.285023355793477
north	correct_old	79-north	1990	9	21	TAR-north	0	1	0	NA	M	2410	4	6	48	0.285023355793477
north	correct_old	79-north	1990	9	21	OND-north	0	1	0	high	F	13247	4	6	48	0.285023355793477
north	correct_old	79-north	1990	9	21	DIL-north	1	0	0	NA	F	4481	4	6	48	0.285023355793477
north	correct_old	79-north	1990	9	21	MYS-north	0	0	1	high	F	5577	4	6	48	0.285023355793477
north	correct_old	79-north	1990	9	21	POU-north	0	1	0	high	F	6307	4	6	48	0.285023355793477
north	correct_old	79-north	1990	9	21	VEN-north	0	0	0	NA	F	4481	4	6	48	0.285023355793477
north	correct_old	79-north	1990	9	21	SAR-north	0	0	0	NA	M	3750	4	6	48	0.285023355793477
north	correct_old	79-north	1990	9	21	AGA-north	0	0	0	low	F	4846	4	6	48	0.285023355793477
north	correct_old	80-north	1990	9	22	ULY-north	0	1	0	NA	M	8865	6	6	48	0.285023355793477
north	correct_old	80-north	1990	9	22	OND-north	0	1	0	high	F	13248	6	6	48	0.285023355793477
north	correct_old	80-north	1990	9	22	SAR-north	0	1	0	NA	M	3751	6	6	48	0.285023355793477
north	correct_old	80-north	1990	9	22	DIL-north	1	1	0	NA	F	4482	6	6	48	0.285023355793477
north	correct_old	80-north	1990	9	22	VEN-north	0	1	0	NA	F	4482	6	6	48	0.285023355793477
north	correct_old	80-north	1990	9	22	GOM-north	0	1	0	middle	F	6308	6	6	48	0.285023355793477
north	correct_old	80-north	1990	9	22	KEN-north	0	1	0	NA	M	7769	6	6	48	0.285023355793477
north	correct_old	80-north	1990	9	22	ROU-north	0	1	0	NA	M	8865	6	6	48	0.285023355793477
north	correct_old	80-north	1990	9	22	BIJ-north	0	1	0	middle	F	5578	6	6	48	0.285023355793477
north	correct_old	80-north	1990	9	22	AGA-north	1	0	0	low	F	4847	6	6	48	0.285023355793477
north	correct_old	80-north	1990	9	22	BRU-north	0	1	0	NA	M	14344	6	6	48	0.285023355793477
north	correct_old	80-north	1990	9	22	MAC-north	0	1	0	NA	M	9595	6	6	48	0.285023355793477
north	correct_old	80-north	1990	9	22	FIT-north	0	1	0	NA	M	5578	6	6	48	0.285023355793477
north	correct_old	80-north	1990	9	22	POU-north	0	0	0	high	F	6308	6	6	48	0.285023355793477
north	correct_old	80-north	1990	9	22	LOU-north	0	1	0	high	F	6673	6	6	48	0.285023355793477
north	correct_old	80-north	1990	9	22	TAR-north	0	1	0	NA	M	2411	6	6	48	0.285023355793477
north	correct_old	80-north	1990	9	22	ALI-north	0	1	0	NA	M	4117	6	6	48	0.285023355793477
north	correct_old	80-north	1990	9	22	FOS-north	1	0	0	NA	F	4117	6	6	48	0.285023355793477
north	correct_old	80-north	1990	9	22	GOS-north	0	1	0	NA	F	1657	6	6	48	0.285023355793477
north	correct_old	80-north	1990	9	22	BAM-north	0	1	0	NA	M	-2694	6	6	48	0.285023355793477
north	correct_old	81-north	1990	9	25	MAC-north	0	0	0	NA	M	9598	4	6	48	0.285023355793477
north	correct_old	81-north	1990	9	25	ULY-north	0	0	0	NA	M	8868	4	6	48	0.285023355793477
north	correct_old	81-north	1990	9	25	OND-north	0	0	0	high	F	13251	4	6	48	0.285023355793477
north	correct_old	81-north	1990	9	25	ALI-north	0	0	0	NA	M	4120	4	6	48	0.285023355793477
north	correct_old	81-north	1990	9	25	SAR-north	0	0	0	NA	M	3754	4	6	48	0.285023355793477
north	correct_old	81-north	1990	9	25	ROU-north	0	0	0	NA	M	8868	4	6	48	0.285023355793477
north	correct_old	81-north	1990	9	25	AGA-north	1	0	0	low	F	4850	4	6	48	0.285023355793477
north	correct_old	81-north	1990	9	25	KEN-north	0	1	0	NA	M	7772	4	6	48	0.285023355793477
north	correct_old	81-north	1990	9	25	FIT-north	0	0	0	NA	M	5581	4	6	48	0.285023355793477
north	correct_old	81-north	1990	9	25	GER-north	0	0	0	NA	M	2659	4	6	48	0.285023355793477
north	correct_old	81-north	1990	9	25	POU-north	1	1	0	high	F	6311	4	6	48	0.285023355793477
north	correct_old	81-north	1990	9	25	GIT-north	0	0	0	middle	F	15077	4	6	48	0.285023355793477
north	correct_old	81-north	1990	9	25	GIP-north	0	0	0	NA	M	3632	4	6	48	0.285023355793477
north	correct_old	81-north	1990	9	25	VEN-north	0	0	0	NA	F	4485	4	6	48	0.285023355793477
north	correct_old	81-north	1990	9	25	FOS-north	1	0	0	NA	F	4120	4	6	48	0.285023355793477
north	correct_old	81-north	1990	9	25	SIR-north	0	0	0	NA	F	1045	4	6	48	0.285023355793477
north	correct_old	81-north	1990	9	25	BRU-north	0	0	0	NA	M	14347	4	6	48	0.285023355793477
north	correct_old	81-north	1990	9	25	TAR-north	0	0	0	NA	M	2414	4	6	48	0.285023355793477
north	correct_old	82-north	1990	9	27	ULY-north	0	1	0	NA	M	8870	3	6	48	0.285023355793477
north	correct_old	82-north	1990	9	27	TAR-north	0	1	0	NA	M	2416	3	6	48	0.285023355793477
north	correct_old	82-north	1990	9	27	KEN-north	0	1	0	NA	M	7774	3	6	48	0.285023355793477
north	correct_old	82-north	1990	9	27	FIT-north	0	1	0	NA	M	5583	3	6	48	0.285023355793477
north	correct_old	82-north	1990	9	27	BRU-north	0	1	0	NA	M	14349	3	6	48	0.285023355793477
north	correct_old	82-north	1990	9	27	MAC-north	0	1	0	NA	M	9600	3	6	48	0.285023355793477
north	correct_old	82-north	1990	9	27	ROU-north	0	1	0	NA	M	8870	3	6	48	0.285023355793477
north	correct_old	82-north	1990	9	27	POU-north	1	1	0	high	F	6313	3	6	48	0.285023355793477
north	correct_old	82-north	1990	9	27	OND-north	0	1	0	high	F	13253	3	6	48	0.285023355793477
north	correct_old	82-north	1990	9	27	SAR-north	0	1	0	NA	M	3756	3	6	48	0.285023355793477
north	correct_old	82-north	1990	9	27	BIJ-north	0	1	0	middle	F	5583	3	6	48	0.285023355793477
north	correct_old	82-north	1990	9	27	GER-north	0	1	0	NA	M	2661	3	6	48	0.285023355793477
north	correct_old	83-north	1990	9	30	OND-north	0	0	0	high	F	13256	8	6	48	0.285023355793477
north	correct_old	83-north	1990	9	30	FIT-north	0	0	0	NA	M	5586	8	6	48	0.285023355793477
north	correct_old	83-north	1990	9	30	SAR-north	0	0	0	NA	M	3759	8	6	48	0.285023355793477
north	correct_old	83-north	1990	9	30	TAR-north	0	1	0	NA	M	2419	8	6	48	0.285023355793477
north	correct_old	83-north	1990	9	30	RIC-north	0	0	0	middle	F	9969	8	6	48	0.285023355793477
north	correct_old	83-north	1990	9	30	FAN-north	0	1	0	high	F	7777	8	6	48	0.285023355793477
north	correct_old	83-north	1990	9	30	GAL-north	0	1	0	middle	F	9603	8	6	48	0.285023355793477
north	correct_old	83-north	1990	9	30	KIR-north	0	0	0	middle	F	7777	8	6	48	0.285023355793477
north	correct_old	83-north	1990	9	30	MAC-north	0	0	0	NA	M	9603	8	6	48	0.285023355793477
north	correct_old	83-north	1990	9	30	ULY-north	0	1	0	NA	M	8873	8	6	48	0.285023355793477
north	correct_old	83-north	1990	9	30	GER-north	0	0	0	NA	M	2664	8	6	48	0.285023355793477
north	correct_old	83-north	1990	9	30	KEN-north	0	0	0	NA	M	7777	8	6	48	0.285023355793477
north	correct_old	83-north	1990	9	30	FOS-north	0	0	0	NA	F	4125	8	6	48	0.285023355793477
north	correct_old	83-north	1990	9	30	DIL-north	0	0	0	NA	F	4490	8	6	48	0.285023355793477
north	correct_old	83-north	1990	9	30	MYS-north	0	0	1	high	F	5586	8	6	48	0.285023355793477
north	correct_old	83-north	1990	9	30	BIJ-north	0	0	0	middle	F	5586	8	6	48	0.285023355793477
north	correct_old	83-north	1990	9	30	GIT-north	0	0	0	middle	F	15082	8	6	48	0.285023355793477
north	correct_old	83-north	1990	9	30	GIP-north	0	0	0	NA	M	3637	8	6	48	0.285023355793477
north	correct_old	83-north	1990	9	30	ROU-north	0	0	0	NA	M	8873	8	6	48	0.285023355793477
north	correct_old	83-north	1990	9	30	BRU-north	0	0	0	NA	M	14352	8	6	48	0.285023355793477
north	correct_old	83-north	1990	9	30	ALI-north	0	0	0	NA	M	4125	8	6	48	0.285023355793477
north	correct_old	83-north	1990	9	30	MAR-north	0	0	0	NA	M	3090	8	6	48	0.285023355793477
north	correct_old	84-north	1990	9	30	ROU-north	0	1	0	NA	M	8873	0	3	48	0.285023355793477
north	correct_old	84-north	1990	9	30	MAC-north	0	1	0	NA	M	9603	0	3	48	0.285023355793477
north	correct_old	84-north	1990	9	30	ULY-north	0	1	0	NA	M	8873	0	3	48	0.285023355793477
north	correct_old	84-north	1990	9	30	ALI-north	0	1	0	NA	M	4125	0	3	48	0.285023355793477
north	correct_old	85-north	1990	10	1	ULY-north	0	1	0	NA	M	8874	0	3	47	0.350900466312912
north	correct_old	85-north	1990	10	1	MAC-north	0	1	0	NA	M	9604	0	3	47	0.350900466312912
north	correct_old	85-north	1990	10	1	ALI-north	0	1	0	NA	M	4126	0	3	47	0.350900466312912
north	correct_old	85-north	1990	10	1	ROU-north	0	1	0	NA	M	8874	0	3	47	0.350900466312912
north	correct_old	86-north	1990	10	2	MAC-north	0	1	0	NA	M	9605	8	7	47	0.350900466312912
north	correct_old	86-north	1990	10	2	ROU-north	0	1	0	NA	M	8875	8	7	47	0.350900466312912
north	correct_old	86-north	1990	10	2	BRU-north	0	1	0	NA	M	14354	8	7	47	0.350900466312912
north	correct_old	86-north	1990	10	2	KEN-north	0	1	0	NA	M	7779	8	7	47	0.350900466312912
north	correct_old	86-north	1990	10	2	DAR-north	0	1	0	NA	M	7779	8	7	47	0.350900466312912
north	correct_old	86-north	1990	10	2	ULY-north	0	1	0	NA	M	8875	8	7	47	0.350900466312912
north	correct_old	86-north	1990	10	2	FIT-north	0	1	0	NA	M	5588	8	7	47	0.350900466312912
north	correct_old	86-north	1990	10	2	GER-north	0	0	0	NA	M	2666	8	7	47	0.350900466312912
north	correct_old	86-north	1990	10	2	TAR-north	0	1	0	NA	M	2421	8	7	47	0.350900466312912
north	correct_old	86-north	1990	10	2	ALI-north	0	1	0	NA	M	4127	8	7	47	0.350900466312912
north	correct_old	86-north	1990	10	2	SAR-north	0	1	0	NA	M	3761	8	7	47	0.350900466312912
north	correct_old	86-north	1990	10	2	LOU-north	0	1	0	high	F	6683	8	7	47	0.350900466312912
north	correct_old	86-north	1990	10	2	BIJ-north	1	1	0	middle	F	5588	8	7	47	0.350900466312912
north	correct_old	86-north	1990	10	2	GIT-north	0	1	0	middle	F	15084	8	7	47	0.350900466312912
north	correct_old	86-north	1990	10	2	GIP-north	0	0	0	NA	M	3639	8	7	47	0.350900466312912
north	correct_old	86-north	1990	10	2	BEL-north	1	0	0	middle	F	5343	8	7	47	0.350900466312912
north	correct_old	86-north	1990	10	2	AGA-north	1	0	0	low	F	4857	8	7	47	0.350900466312912
north	correct_old	86-north	1990	10	2	FOS-north	0	0	0	NA	F	4127	8	7	47	0.350900466312912
north	correct_old	86-north	1990	10	2	KIR-north	1	1	0	middle	F	7779	8	7	47	0.350900466312912
north	correct_old	86-north	1990	10	2	OND-north	0	1	0	high	F	13258	8	7	47	0.350900466312912
north	correct_old	86-north	1990	10	2	BRA-north	0	1	0	NA	M	2270	8	7	47	0.350900466312912
north	correct_old	86-north	1990	10	2	DIL-north	0	0	0	NA	F	4492	8	7	47	0.350900466312912
north	correct_old	86-north	1990	10	2	GOM-north	1	1	0	middle	F	6318	8	7	47	0.350900466312912
north	correct_old	87-north	1990	10	7	KEN-north	0	1	0	NA	M	7784	0	5	47	0.350900466312912
north	correct_old	87-north	1990	10	7	ROU-north	0	1	0	NA	M	8880	0	5	47	0.350900466312912
north	correct_old	87-north	1990	10	7	FIT-north	0	1	0	NA	M	5593	0	5	47	0.350900466312912
north	correct_old	87-north	1990	10	7	ALI-north	0	1	0	NA	M	4132	0	5	47	0.350900466312912
north	correct_old	87-north	1990	10	7	BRU-north	0	1	0	NA	M	14359	0	5	47	0.350900466312912
north	correct_old	87-north	1990	10	7	MAC-north	0	1	0	NA	M	9610	0	5	47	0.350900466312912
north	correct_old	87-north	1990	10	7	GER-north	0	1	0	NA	M	2671	0	5	47	0.350900466312912
north	correct_old	87-north	1990	10	7	BRA-north	0	1	0	NA	M	2275	0	5	47	0.350900466312912
north	correct_old	88-north	1990	10	8	KEN-north	0	1	0	NA	M	7785	4	3	47	0.350900466312912
north	correct_old	88-north	1990	10	8	ULY-north	0	1	0	NA	M	8881	4	3	47	0.350900466312912
north	correct_old	88-north	1990	10	8	VEN-north	1	0	0	NA	F	4498	4	3	47	0.350900466312912
north	correct_old	88-north	1990	10	8	FIT-north	0	1	0	NA	M	5594	4	3	47	0.350900466312912
north	correct_old	88-north	1990	10	8	GAL-north	1	0	0	middle	F	9611	4	3	47	0.350900466312912
north	correct_old	88-north	1990	10	8	RIC-north	0	0	0	middle	F	9977	4	3	47	0.350900466312912
north	correct_old	88-north	1990	10	8	FAN-north	0	0	0	high	F	7785	4	3	47	0.350900466312912
north	correct_old	88-north	1990	10	8	HER-north	0	0	0	middle	F	9246	4	3	47	0.350900466312912
north	correct_old	88-north	1990	10	8	MAR-north	0	0	0	NA	M	3098	4	3	47	0.350900466312912
north	correct_old	88-north	1990	10	8	GER-north	0	1	0	NA	M	2672	4	3	47	0.350900466312912
north	correct_old	89-north	1990	10	11	MAC-north	0	1	0	NA	M	9614	6	5	47	0.350900466312912
north	correct_old	89-north	1990	10	11	KEN-north	0	1	0	NA	M	7788	6	5	47	0.350900466312912
north	correct_old	89-north	1990	10	11	ROU-north	0	1	0	NA	M	8884	6	5	47	0.350900466312912
north	correct_old	89-north	1990	10	11	FIT-north	0	1	0	NA	M	5597	6	5	47	0.350900466312912
north	correct_old	89-north	1990	10	11	GER-north	0	0	0	NA	M	2675	6	5	47	0.350900466312912
north	correct_old	89-north	1990	10	11	DAR-north	0	0	0	NA	M	7788	6	5	47	0.350900466312912
north	correct_old	89-north	1990	10	11	POU-north	0	1	0	high	F	6327	6	5	47	0.350900466312912
north	correct_old	89-north	1990	10	11	OND-north	0	0	0	high	F	13267	6	5	47	0.350900466312912
north	correct_old	89-north	1990	10	11	KIR-north	1	0	0	middle	F	7788	6	5	47	0.350900466312912
north	correct_old	89-north	1990	10	11	BIJ-north	1	0	0	middle	F	5597	6	5	47	0.350900466312912
north	correct_old	89-north	1990	10	11	DIL-north	0	0	0	NA	F	4501	6	5	47	0.350900466312912
north	correct_old	89-north	1990	10	11	FOS-north	0	0	0	NA	F	4136	6	5	47	0.350900466312912
north	correct_old	89-north	1990	10	11	GOM-north	1	0	0	middle	F	6327	6	5	47	0.350900466312912
north	correct_old	89-north	1990	10	11	VEN-north	1	0	0	NA	F	4501	6	5	47	0.350900466312912
north	correct_old	89-north	1990	10	11	AGA-north	0	0	0	low	F	4866	6	5	47	0.350900466312912
north	correct_old	89-north	1990	10	11	SAR-north	0	0	0	NA	M	3770	6	5	47	0.350900466312912
north	correct_old	90-north	1990	10	11	MAC-north	0	1	0	NA	M	9614	7	6	47	0.350900466312912
north	correct_old	90-north	1990	10	11	KEN-north	0	1	0	NA	M	7788	7	6	47	0.350900466312912
north	correct_old	90-north	1990	10	11	ROU-north	0	0	0	NA	M	8884	7	6	47	0.350900466312912
north	correct_old	90-north	1990	10	11	FIT-north	0	1	0	NA	M	5597	7	6	47	0.350900466312912
north	correct_old	90-north	1990	10	11	GER-north	0	0	0	NA	M	2675	7	6	47	0.350900466312912
north	correct_old	90-north	1990	10	11	DAR-north	0	1	0	NA	M	7788	7	6	47	0.350900466312912
north	correct_old	90-north	1990	10	11	POU-north	0	0	0	high	F	6327	7	6	47	0.350900466312912
north	correct_old	90-north	1990	10	11	OND-north	0	1	0	high	F	13267	7	6	47	0.350900466312912
north	correct_old	90-north	1990	10	11	KIR-north	1	1	0	middle	F	7788	7	6	47	0.350900466312912
north	correct_old	90-north	1990	10	11	BIJ-north	1	0	0	middle	F	5597	7	6	47	0.350900466312912
north	correct_old	90-north	1990	10	11	DIL-north	0	0	0	NA	F	4501	7	6	47	0.350900466312912
north	correct_old	90-north	1990	10	11	FOS-north	0	0	0	NA	F	4136	7	6	47	0.350900466312912
north	correct_old	90-north	1990	10	11	GOM-north	1	0	0	middle	F	6327	7	6	47	0.350900466312912
north	correct_old	90-north	1990	10	11	VEN-north	1	0	0	NA	F	4501	7	6	47	0.350900466312912
north	correct_old	90-north	1990	10	11	AGA-north	0	0	0	low	F	4866	7	6	47	0.350900466312912
north	correct_old	90-north	1990	10	11	SAR-north	0	1	0	NA	M	3770	7	6	47	0.350900466312912
north	correct_old	90-north	1990	10	11	LOU-north	1	1	0	high	F	6692	7	6	47	0.350900466312912
north	correct_old	90-north	1990	10	11	ULY-north	0	1	0	NA	M	8884	7	6	47	0.350900466312912
north	correct_old	91-north	1990	10	12	CAS-north	1	0	1	low	F	5232	7	6	47	0.350900466312912
north	correct_old	91-north	1990	10	12	MYS-north	0	1	1	high	F	5598	7	6	47	0.350900466312912
north	correct_old	91-north	1990	10	12	KEN-north	0	1	0	NA	M	7789	7	6	47	0.350900466312912
north	correct_old	91-north	1990	10	12	DAR-north	0	1	0	NA	M	7789	7	6	47	0.350900466312912
north	correct_old	91-north	1990	10	12	GOM-north	1	1	0	middle	F	6328	7	6	47	0.350900466312912
north	correct_old	91-north	1990	10	12	OND-north	0	1	0	high	F	13268	7	6	47	0.350900466312912
north	correct_old	91-north	1990	10	12	DIL-north	0	0	0	NA	F	4502	7	6	47	0.350900466312912
north	correct_old	91-north	1990	10	12	POU-north	0	0	0	high	F	6328	7	6	47	0.350900466312912
north	correct_old	91-north	1990	10	12	VEN-north	1	0	0	NA	F	4502	7	6	47	0.350900466312912
north	correct_old	91-north	1990	10	12	FOS-north	0	0	0	NA	F	4137	7	6	47	0.350900466312912
north	correct_old	91-north	1990	10	12	LOU-north	1	0	0	high	F	6693	7	6	47	0.350900466312912
north	correct_old	91-north	1990	10	12	MAC-north	0	1	0	NA	M	9615	7	6	47	0.350900466312912
north	correct_old	91-north	1990	10	12	ROU-north	0	1	0	NA	M	8885	7	6	47	0.350900466312912
north	correct_old	91-north	1990	10	12	SAR-north	0	1	0	NA	M	3771	7	6	47	0.350900466312912
north	correct_old	91-north	1990	10	12	FIT-north	0	1	0	NA	M	5598	7	6	47	0.350900466312912
north	correct_old	91-north	1990	10	12	GER-north	0	0	0	NA	M	2676	7	6	47	0.350900466312912
north	correct_old	91-north	1990	10	12	GOS-north	0	0	0	NA	F	1677	7	6	47	0.350900466312912
north	correct_old	91-north	1990	10	12	ULY-north	0	0	0	NA	M	8885	7	6	47	0.350900466312912
north	correct_old	91-north	1990	10	12	BRA-north	0	1	0	NA	M	2280	7	6	47	0.350900466312912
north	correct_old	91-north	1990	10	12	PER-north	0	0	1	low	F	5232	7	6	47	0.350900466312912
north	correct_old	92-north	1990	10	16	MAC-north	0	1	0	NA	M	9619	8	3	47	0.350900466312912
north	correct_old	92-north	1990	10	16	ROU-north	0	1	0	NA	M	8889	8	3	47	0.350900466312912
north	correct_old	92-north	1990	10	16	OND-north	0	1	0	high	F	13272	8	3	47	0.350900466312912
north	correct_old	92-north	1990	10	16	SAR-north	0	1	0	NA	M	3775	8	3	47	0.350900466312912
north	correct_old	92-north	1990	10	16	KEN-north	0	1	0	NA	M	7793	8	3	47	0.350900466312912
north	correct_old	92-north	1990	10	16	GAL-north	0	1	0	middle	F	9619	8	3	47	0.350900466312912
north	correct_old	92-north	1990	10	16	DIL-north	0	1	0	NA	F	4506	8	3	47	0.350900466312912
north	correct_old	92-north	1990	10	16	POU-north	0	1	0	high	F	6332	8	3	47	0.350900466312912
north	correct_old	92-north	1990	10	16	AGA-north	0	1	0	low	F	4871	8	3	47	0.350900466312912
north	correct_old	92-north	1990	10	16	GOM-north	1	1	0	middle	F	6332	8	3	47	0.350900466312912
north	correct_old	92-north	1990	10	16	LOU-north	1	1	0	high	F	6697	8	3	47	0.350900466312912
north	correct_old	92-north	1990	10	16	CHO-north	0	0	0	NA	F	3502	8	3	47	0.350900466312912
north	correct_old	92-north	1990	10	16	MYS-north	0	0	1	high	F	5602	8	3	47	0.350900466312912
north	correct_old	92-north	1990	10	16	LYC-north	0	1	0	NA	F	1690	8	3	47	0.350900466312912
north	correct_old	92-north	1990	10	16	BIJ-north	1	1	0	middle	F	5602	8	3	47	0.350900466312912
north	correct_old	92-north	1990	10	16	GOS-north	0	1	0	NA	F	1681	8	3	47	0.350900466312912
north	correct_old	93-north	1990	10	17	MAC-north	0	1	0	NA	M	9620	0	4	47	0.350900466312912
north	correct_old	93-north	1990	10	17	FIT-north	0	1	0	NA	M	5603	0	4	47	0.350900466312912
north	correct_old	93-north	1990	10	17	KEN-north	0	1	0	NA	M	7794	0	4	47	0.350900466312912
north	correct_old	93-north	1990	10	17	ROU-north	0	1	0	NA	M	8890	0	4	47	0.350900466312912
north	correct_old	93-north	1990	10	17	GER-north	0	1	0	NA	M	2681	0	4	47	0.350900466312912
north	correct_old	94-north	1990	10	22	BRU-north	0	1	0	NA	M	14374	9	7	47	0.350900466312912
north	correct_old	94-north	1990	10	22	ULY-north	0	1	0	NA	M	8895	9	7	47	0.350900466312912
north	correct_old	94-north	1990	10	22	BRA-north	0	0	0	NA	M	2290	9	7	47	0.350900466312912
north	correct_old	94-north	1990	10	22	KEN-north	0	0	0	NA	M	7799	9	7	47	0.350900466312912
north	correct_old	94-north	1990	10	22	ROU-north	0	0	0	NA	M	8895	9	7	47	0.350900466312912
north	correct_old	94-north	1990	10	22	SAR-north	0	0	0	NA	M	3781	9	7	47	0.350900466312912
north	correct_old	94-north	1990	10	22	OND-north	0	0	0	high	F	13278	9	7	47	0.350900466312912
north	correct_old	94-north	1990	10	22	BIJ-north	0	1	0	middle	F	5608	9	7	47	0.350900466312912
north	correct_old	94-north	1990	10	22	AGA-north	0	0	0	low	F	4877	9	7	47	0.350900466312912
north	correct_old	94-north	1990	10	22	MAC-north	0	1	0	NA	M	9625	9	7	47	0.350900466312912
north	correct_old	94-north	1990	10	22	TAR-north	0	1	0	NA	M	2441	9	7	47	0.350900466312912
north	correct_old	94-north	1990	10	22	ALI-north	0	1	0	NA	M	4147	9	7	47	0.350900466312912
north	correct_old	94-north	1990	10	22	FOS-north	1	0	0	NA	F	4147	9	7	47	0.350900466312912
north	correct_old	94-north	1990	10	22	VEN-north	1	0	0	NA	F	4512	9	7	47	0.350900466312912
north	correct_old	94-north	1990	10	22	GIT-north	1	0	0	middle	F	15104	9	7	47	0.350900466312912
north	correct_old	94-north	1990	10	22	GIP-north	0	0	0	NA	M	3659	9	7	47	0.350900466312912
north	correct_old	94-north	1990	10	22	MYS-north	0	0	1	high	F	5608	9	7	47	0.350900466312912
north	correct_old	94-north	1990	10	22	CAS-north	1	0	1	low	F	5242	9	7	47	0.350900466312912
north	correct_old	94-north	1990	10	22	DIL-north	1	0	0	NA	F	4512	9	7	47	0.350900466312912
north	correct_old	94-north	1990	10	22	LOU-north	1	1	0	high	F	6703	9	7	47	0.350900466312912
north	correct_old	94-north	1990	10	22	CHO-north	0	0	0	NA	F	3508	9	7	47	0.350900466312912
north	correct_old	94-north	1990	10	22	FIT-north	0	0	0	NA	M	5608	9	7	47	0.350900466312912
north	correct_old	94-north	1990	10	22	GER-north	0	0	0	NA	M	2686	9	7	47	0.350900466312912
north	correct_old	94-north	1990	10	22	DAR-north	0	0	0	NA	M	7799	9	7	47	0.350900466312912
north	correct_old	94-north	1990	10	22	POU-north	0	1	0	high	F	6338	9	7	47	0.350900466312912
north	correct_old	94-north	1990	10	22	LYC-north	0	1	0	NA	F	1696	9	7	47	0.350900466312912
north	correct_old	94-north	1990	10	22	XER-north	0	1	0	low	F	7434	9	7	47	0.350900466312912
north	correct_old	95-north	1991	2	15	XER-north	0	0	1	low	F	7550	12	4	46	0.215303405428131
north	correct_old	95-north	1991	2	15	CHO-north	0	0	0	NA	F	3624	12	4	46	0.215303405428131
north	correct_old	95-north	1991	2	15	BIJ-north	1	1	0	middle	F	5724	12	4	46	0.215303405428131
north	correct_old	95-north	1991	2	15	POU-north	0	1	1	high	F	6454	12	4	46	0.215303405428131
north	correct_old	95-north	1991	2	15	MYS-north	0	0	1	high	F	5724	12	4	46	0.215303405428131
north	correct_old	95-north	1991	2	15	FIT-north	0	1	0	NA	M	5724	12	4	46	0.215303405428131
north	correct_old	95-north	1991	2	15	OND-north	1	1	0	high	F	13394	12	4	46	0.215303405428131
north	correct_old	95-north	1991	2	15	MAC-north	0	1	0	NA	M	9741	12	4	46	0.215303405428131
north	correct_old	95-north	1991	2	15	BRU-north	0	1	0	NA	M	14490	12	4	46	0.215303405428131
north	correct_old	95-north	1991	2	15	DAR-north	0	1	0	NA	M	7915	12	4	46	0.215303405428131
north	correct_old	95-north	1991	2	15	KIR-north	1	1	0	middle	F	7915	12	4	46	0.215303405428131
north	correct_old	95-north	1991	2	15	GIT-north	0	1	0	middle	F	15220	12	4	46	0.215303405428131
north	correct_old	95-north	1991	2	15	HER-north	0	1	1	high	F	9376	12	4	46	0.215303405428131
north	correct_old	95-north	1991	2	15	SAR-north	0	1	0	NA	M	3897	12	4	46	0.215303405428131
north	correct_old	95-north	1991	2	15	LOU-north	0	0	0	high	F	6819	12	4	46	0.215303405428131
north	correct_old	95-north	1991	2	15	ALI-north	0	1	0	NA	M	4263	12	4	46	0.215303405428131
north	correct_old	95-north	1991	2	15	KAN-north	0	0	0	NA	F	1351	12	4	46	0.215303405428131
north	correct_old	95-north	1991	2	15	DIL-north	1	0	0	NA	F	4628	12	4	46	0.215303405428131
north	correct_old	95-north	1991	2	15	GIP-north	0	1	0	NA	M	3775	12	4	46	0.215303405428131
north	correct_old	95-north	1991	2	15	GOY-north	0	1	0	NA	F	2041	12	4	46	0.215303405428131
north	correct_old	95-north	1991	2	15	GOM-north	1	0	0	middle	F	6454	12	4	46	0.215303405428131
north	correct_old	95-north	1991	2	15	PER-north	0	0	1	low	F	5358	12	4	46	0.215303405428131
north	correct_old	95-north	1991	2	15	AGA-north	1	0	0	low	F	4993	12	4	46	0.215303405428131
north	correct_old	96-north	1991	3	6	FIT-north	0	1	0	NA	M	5743	0	5	46	0.162569498690438
north	correct_old	96-north	1991	3	6	BRU-north	0	1	0	NA	M	14509	0	5	46	0.162569498690438
north	correct_old	96-north	1991	3	6	ALI-north	0	0	0	NA	M	4282	0	5	46	0.162569498690438
north	correct_old	96-north	1991	3	6	DAR-north	0	1	0	NA	M	7934	0	5	46	0.162569498690438
north	correct_old	96-north	1991	3	6	ROU-north	0	1	0	NA	M	9030	0	5	46	0.162569498690438
north	correct_old	96-north	1991	3	6	MAC-north	0	1	0	NA	M	9760	0	5	46	0.162569498690438
north	correct_old	96-north	1991	3	6	SAR-north	0	0	0	NA	M	3916	0	5	46	0.162569498690438
north	correct_old	97-north	1991	3	19	FOS-north	0	0	0	NA	F	4295	12	6	46	0.162569498690438
north	correct_old	97-north	1991	3	19	PER-north	1	0	1	low	F	5390	12	6	46	0.162569498690438
north	correct_old	97-north	1991	3	19	CHO-north	0	0	0	NA	F	3656	12	6	46	0.162569498690438
north	correct_old	97-north	1991	3	19	FIT-north	0	1	0	NA	M	5756	12	6	46	0.162569498690438
north	correct_old	97-north	1991	3	19	ROU-north	0	0	0	NA	M	9043	12	6	46	0.162569498690438
north	correct_old	97-north	1991	3	19	GIT-north	0	1	0	middle	F	15252	12	6	46	0.162569498690438
north	correct_old	97-north	1991	3	19	LOU-north	0	1	0	high	F	6851	12	6	46	0.162569498690438
north	correct_old	97-north	1991	3	19	KEN-north	0	1	0	NA	M	7947	12	6	46	0.162569498690438
north	correct_old	97-north	1991	3	19	BRU-north	0	1	0	NA	M	14522	12	6	46	0.162569498690438
north	correct_old	97-north	1991	3	19	MAC-north	0	1	0	NA	M	9773	12	6	46	0.162569498690438
north	correct_old	97-north	1991	3	19	MYS-north	0	0	1	high	F	5756	12	6	46	0.162569498690438
north	correct_old	97-north	1991	3	19	OND-north	0	1	0	high	F	13426	12	6	46	0.162569498690438
north	correct_old	97-north	1991	3	19	DAR-north	0	1	0	NA	M	7947	12	6	46	0.162569498690438
north	correct_old	97-north	1991	3	19	ALI-north	0	1	0	NA	M	4295	12	6	46	0.162569498690438
north	correct_old	97-north	1991	3	19	SAR-north	0	1	0	NA	M	3929	12	6	46	0.162569498690438
north	correct_old	97-north	1991	3	19	XER-north	1	1	1	low	F	7582	12	6	46	0.162569498690438
north	correct_old	97-north	1991	3	19	CAS-north	1	0	1	low	F	5390	12	6	46	0.162569498690438
north	correct_old	97-north	1991	3	19	GOM-north	1	0	0	middle	F	6486	12	6	46	0.162569498690438
north	correct_old	97-north	1991	3	19	BIJ-north	1	0	0	middle	F	5756	12	6	46	0.162569498690438
north	correct_old	97-north	1991	3	19	HER-north	0	1	1	high	F	9408	12	6	46	0.162569498690438
north	correct_old	97-north	1991	3	19	POU-north	0	1	1	high	F	6486	12	6	46	0.162569498690438
north	correct_old	97-north	1991	3	19	GOY-north	0	1	0	NA	F	2073	12	6	46	0.162569498690438
north	correct_old	97-north	1991	3	19	KIR-north	0	1	0	middle	F	7947	12	6	46	0.162569498690438
north	correct_old	97-north	1991	3	19	DIL-north	1	0	0	NA	F	4660	12	6	46	0.162569498690438
north	correct_old	98-north	1991	3	20	FIT-north	0	1	0	NA	M	5757	9	6	46	0.162569498690438
north	correct_old	98-north	1991	3	20	MAC-north	0	1	0	NA	M	9774	9	6	46	0.162569498690438
north	correct_old	98-north	1991	3	20	DAR-north	0	1	0	NA	M	7948	9	6	46	0.162569498690438
north	correct_old	98-north	1991	3	20	ALI-north	0	0	0	NA	M	4296	9	6	46	0.162569498690438
north	correct_old	98-north	1991	3	20	ROU-north	0	1	0	NA	M	9044	9	6	46	0.162569498690438
north	correct_old	98-north	1991	3	20	GIT-north	0	0	0	middle	F	15253	9	6	46	0.162569498690438
north	correct_old	98-north	1991	3	20	KEN-north	0	1	0	NA	M	7948	9	6	46	0.162569498690438
north	correct_old	98-north	1991	3	20	BRU-north	0	1	0	NA	M	14523	9	6	46	0.162569498690438
north	correct_old	98-north	1991	3	20	POU-north	0	0	1	high	F	6487	9	6	46	0.162569498690438
north	correct_old	98-north	1991	3	20	HER-north	0	1	1	high	F	9409	9	6	46	0.162569498690438
north	correct_old	98-north	1991	3	20	OND-north	0	1	0	high	F	13427	9	6	46	0.162569498690438
north	correct_old	98-north	1991	3	20	BIJ-north	0	1	0	middle	F	5757	9	6	46	0.162569498690438
north	correct_old	98-north	1991	3	20	GAL-north	0	1	0	middle	F	9774	9	6	46	0.162569498690438
north	correct_old	98-north	1991	3	20	GER-north	0	1	0	NA	M	2835	9	6	46	0.162569498690438
north	correct_old	98-north	1991	3	20	SAR-north	0	1	0	NA	M	3930	9	6	46	0.162569498690438
north	correct_old	98-north	1991	3	20	MYS-north	0	1	1	high	F	5757	9	6	46	0.162569498690438
north	correct_old	98-north	1991	3	20	SIR-north	0	1	0	NA	F	1221	9	6	46	0.162569498690438
north	correct_old	98-north	1991	3	20	XER-north	1	1	1	low	F	7583	9	6	46	0.162569498690438
north	correct_old	98-north	1991	3	20	XIN-north	0	1	0	NA	F	2408	9	6	46	0.162569498690438
north	correct_old	98-north	1991	3	20	FOS-north	1	0	0	NA	F	4296	9	6	46	0.162569498690438
north	correct_old	98-north	1991	3	20	RIC-north	0	0	0	high	F	10140	9	6	46	0.162569498690438
north	correct_old	99-north	1991	3	23	OND-north	0	0	0	high	F	13430	11	2	46	0.162569498690438
north	correct_old	99-north	1991	3	23	LOU-north	0	0	0	high	F	6855	11	2	46	0.162569498690438
north	correct_old	99-north	1991	3	23	KIR-north	0	0	0	middle	F	7951	11	2	46	0.162569498690438
north	correct_old	99-north	1991	3	23	MAC-north	0	1	0	NA	M	9777	11	2	46	0.162569498690438
north	correct_old	99-north	1991	3	23	DIL-north	1	0	0	NA	F	4664	11	2	46	0.162569498690438
north	correct_old	99-north	1991	3	23	FOS-north	1	0	0	NA	F	4299	11	2	46	0.162569498690438
north	correct_old	99-north	1991	3	23	BIJ-north	0	0	0	middle	F	5760	11	2	46	0.162569498690438
north	correct_old	99-north	1991	3	23	POU-north	0	0	1	high	F	6490	11	2	46	0.162569498690438
north	correct_old	99-north	1991	3	23	ROU-north	0	0	0	NA	M	9047	11	2	46	0.162569498690438
north	correct_old	99-north	1991	3	23	AGA-north	1	0	0	low	F	5029	11	2	46	0.162569498690438
north	correct_old	99-north	1991	3	23	CHO-north	0	0	0	NA	F	3660	11	2	46	0.162569498690438
north	correct_old	99-north	1991	3	23	GIP-north	0	1	0	NA	M	3811	11	2	46	0.162569498690438
north	correct_old	99-north	1991	3	23	XER-north	1	1	1	low	F	7586	11	2	46	0.162569498690438
north	correct_old	99-north	1991	3	23	GAL-north	0	0	0	middle	F	9777	11	2	46	0.162569498690438
north	correct_old	99-north	1991	3	23	GOM-north	1	1	0	middle	F	6490	11	2	46	0.162569498690438
north	correct_old	99-north	1991	3	23	XIN-north	0	1	0	NA	F	2411	11	2	46	0.162569498690438
north	correct_old	99-north	1991	3	23	GOS-north	0	0	0	NA	F	1839	11	2	46	0.162569498690438
north	correct_old	99-north	1991	3	23	MYS-north	0	0	1	high	F	5760	11	2	46	0.162569498690438
north	correct_old	99-north	1991	3	23	CAS-north	1	0	1	low	F	5394	11	2	46	0.162569498690438
north	correct_old	100-north	1991	9	11	FIT-north	0	0	0	NA	M	5932	9	4	47	0.285023355793477
north	correct_old	100-north	1991	9	11	ROU-north	0	0	0	NA	M	9219	9	4	47	0.285023355793477
north	correct_old	100-north	1991	9	11	GER-north	0	0	0	NA	M	3010	9	4	47	0.285023355793477
north	correct_old	100-north	1991	9	11	DAR-north	0	0	0	NA	M	8123	9	4	47	0.285023355793477
north	correct_old	100-north	1991	9	11	PER-north	1	0	1	low	F	5566	9	4	47	0.285023355793477
north	correct_old	100-north	1991	9	11	BRU-north	0	1	0	NA	M	14698	9	4	47	0.285023355793477
north	correct_old	100-north	1991	9	11	GAL-north	0	0	0	middle	F	9949	9	4	47	0.285023355793477
north	correct_old	100-north	1991	9	11	SAR-north	0	0	0	NA	M	4105	9	4	47	0.285023355793477
north	correct_old	100-north	1991	9	11	ALI-north	0	1	0	NA	M	4471	9	4	47	0.285023355793477
north	correct_old	100-north	1991	9	11	BIJ-north	0	1	0	middle	F	5932	9	4	47	0.285023355793477
north	correct_old	100-north	1991	9	11	OND-north	0	1	0	high	F	13602	9	4	47	0.285023355793477
north	correct_old	100-north	1991	9	11	POU-north	0	1	1	high	F	6662	9	4	47	0.285023355793477
north	correct_old	100-north	1991	9	11	HER-north	0	1	1	high	F	9584	9	4	47	0.285023355793477
north	correct_old	100-north	1991	9	11	MYS-north	0	0	1	high	F	5932	9	4	47	0.285023355793477
north	correct_old	100-north	1991	9	11	VEN-north	0	0	1	middle	F	4836	9	4	47	0.285023355793477
north	correct_old	100-north	1991	9	11	AGA-north	0	0	0	low	F	5201	9	4	47	0.285023355793477
north	correct_old	100-north	1991	9	11	GIP-north	0	0	0	NA	M	3983	9	4	47	0.285023355793477
north	correct_old	101-north	1991	9	14	FIT-north	0	0	0	NA	M	5935	6	5	47	0.285023355793477
north	correct_old	101-north	1991	9	14	KEN-north	0	1	0	NA	M	8126	6	5	47	0.285023355793477
north	correct_old	101-north	1991	9	14	GER-north	0	0	0	NA	M	3013	6	5	47	0.285023355793477
north	correct_old	101-north	1991	9	14	SAR-north	0	0	0	NA	M	4108	6	5	47	0.285023355793477
north	correct_old	101-north	1991	9	14	DAR-north	0	1	0	NA	M	8126	6	5	47	0.285023355793477
north	correct_old	101-north	1991	9	14	BRU-north	0	1	0	NA	M	14701	6	5	47	0.285023355793477
north	correct_old	101-north	1991	9	14	MYS-north	0	0	1	high	F	5935	6	5	47	0.285023355793477
north	correct_old	101-north	1991	9	14	OND-north	0	1	0	high	F	13605	6	5	47	0.285023355793477
north	correct_old	101-north	1991	9	14	ALI-north	0	1	0	NA	M	4474	6	5	47	0.285023355793477
north	correct_old	101-north	1991	9	14	ROU-north	0	1	0	NA	M	9222	6	5	47	0.285023355793477
north	correct_old	101-north	1991	9	14	POU-north	0	1	1	high	F	6665	6	5	47	0.285023355793477
north	correct_old	101-north	1991	9	14	BIJ-north	0	1	0	middle	F	5935	6	5	47	0.285023355793477
north	correct_old	101-north	1991	9	14	HER-north	0	1	1	high	F	9587	6	5	47	0.285023355793477
north	correct_old	101-north	1991	9	14	GIT-north	0	1	0	middle	F	15431	6	5	47	0.285023355793477
north	correct_old	101-north	1991	9	14	FOS-north	0	1	0	NA	F	4474	6	5	47	0.285023355793477
north	correct_old	101-north	1991	9	14	SIR-north	0	1	0	NA	F	1399	6	5	47	0.285023355793477
north	correct_old	102-north	1991	9	22	BRU-north	0	1	0	NA	M	14709	13	5	47	0.285023355793477
north	correct_old	102-north	1991	9	22	ALI-north	0	1	0	NA	M	4482	13	5	47	0.285023355793477
north	correct_old	102-north	1991	9	22	DAR-north	0	1	0	NA	M	8134	13	5	47	0.285023355793477
north	correct_old	102-north	1991	9	22	KEN-north	0	1	0	NA	M	8134	13	5	47	0.285023355793477
north	correct_old	102-north	1991	9	22	ROU-north	0	1	0	NA	M	9230	13	5	47	0.285023355793477
north	correct_old	102-north	1991	9	22	FIT-north	0	1	0	NA	M	5943	13	5	47	0.285023355793477
north	correct_old	102-north	1991	9	22	RIC-north	0	0	0	high	F	10326	13	5	47	0.285023355793477
north	correct_old	102-north	1991	9	22	OND-north	1	1	0	high	F	13613	13	5	47	0.285023355793477
north	correct_old	102-north	1991	9	22	GAL-north	0	1	0	middle	F	9960	13	5	47	0.285023355793477
north	correct_old	102-north	1991	9	22	AGA-north	0	0	0	low	F	5212	13	5	47	0.285023355793477
north	correct_old	102-north	1991	9	22	DIL-north	0	0	0	low	F	4847	13	5	47	0.285023355793477
north	correct_old	102-north	1991	9	22	GIP-north	0	1	0	NA	M	3994	13	5	47	0.285023355793477
north	correct_old	102-north	1991	9	22	SAR-north	0	1	0	NA	M	4116	13	5	47	0.285023355793477
north	correct_old	102-north	1991	9	22	POU-north	0	1	1	high	F	6673	13	5	47	0.285023355793477
north	correct_old	102-north	1991	9	22	GIT-north	0	1	0	middle	F	15439	13	5	47	0.285023355793477
north	correct_old	102-north	1991	9	22	HER-north	0	1	1	high	F	9595	13	5	47	0.285023355793477
north	correct_old	102-north	1991	9	22	MYS-north	0	0	1	high	F	5943	13	5	47	0.285023355793477
north	correct_old	102-north	1991	9	22	BIJ-north	0	1	0	middle	F	5943	13	5	47	0.285023355793477
north	correct_old	102-north	1991	9	22	PER-north	0	0	1	low	F	5577	13	5	47	0.285023355793477
north	correct_old	102-north	1991	9	22	GOY-north	0	1	0	NA	F	2260	13	5	47	0.285023355793477
north	correct_old	102-north	1991	9	22	XIN-north	0	1	0	NA	F	2594	13	5	47	0.285023355793477
north	correct_old	102-north	1991	9	22	SIR-north	0	1	0	NA	F	1407	13	5	47	0.285023355793477
north	correct_old	102-north	1991	9	22	VEN-north	0	1	1	middle	F	4847	13	5	47	0.285023355793477
north	correct_old	102-north	1991	9	22	XER-north	0	1	1	low	F	7769	13	5	47	0.285023355793477
north	correct_old	103-north	1991	9	25	FIT-north	0	0	0	NA	M	5946	7	5	47	0.285023355793477
north	correct_old	103-north	1991	9	25	BRU-north	0	0	0	NA	M	14712	7	5	47	0.285023355793477
north	correct_old	103-north	1991	9	25	ROU-north	0	0	0	NA	M	9233	7	5	47	0.285023355793477
north	correct_old	103-north	1991	9	25	ALI-north	0	0	0	NA	M	4485	7	5	47	0.285023355793477
north	correct_old	103-north	1991	9	25	KEN-north	0	0	0	NA	M	8137	7	5	47	0.285023355793477
north	correct_old	103-north	1991	9	25	SAR-north	0	0	0	NA	M	4119	7	5	47	0.285023355793477
north	correct_old	103-north	1991	9	25	GAL-north	1	1	0	middle	F	9963	7	5	47	0.285023355793477
north	correct_old	103-north	1991	9	25	HER-north	0	1	1	high	F	9598	7	5	47	0.285023355793477
north	correct_old	103-north	1991	9	25	DAR-north	0	0	0	NA	M	8137	7	5	47	0.285023355793477
north	correct_old	103-north	1991	9	25	OND-north	0	0	0	high	F	13616	7	5	47	0.285023355793477
north	correct_old	103-north	1991	9	25	GER-north	0	0	0	NA	M	3024	7	5	47	0.285023355793477
north	correct_old	103-north	1991	9	25	RIC-north	0	0	0	high	F	10329	7	5	47	0.285023355793477
north	correct_old	103-north	1991	9	25	GIT-north	0	0	0	middle	F	15442	7	5	47	0.285023355793477
north	correct_old	103-north	1991	9	25	GIP-north	0	0	0	NA	M	3997	7	5	47	0.285023355793477
north	correct_old	103-north	1991	9	25	GOY-north	0	0	0	NA	F	2263	7	5	47	0.285023355793477
north	correct_old	103-north	1991	9	25	PER-north	0	0	1	low	F	5580	7	5	47	0.285023355793477
north	correct_old	103-north	1991	9	25	BIJ-north	0	0	0	middle	F	5946	7	5	47	0.285023355793477
north	correct_old	104-north	1991	10	3	DAR-north	0	1	0	NA	M	8145	7	5	48	0.350900466312912
north	correct_old	104-north	1991	10	3	MAC-north	0	1	0	NA	M	9971	7	5	48	0.350900466312912
north	correct_old	104-north	1991	10	3	MAR-north	0	0	0	NA	M	3458	7	5	48	0.350900466312912
north	correct_old	104-north	1991	10	3	BRU-north	0	1	0	NA	M	14720	7	5	48	0.350900466312912
north	correct_old	104-north	1991	10	3	ALI-north	0	1	0	NA	M	4493	7	5	48	0.350900466312912
north	correct_old	104-north	1991	10	3	FAN-north	0	1	0	high	F	8145	7	5	48	0.350900466312912
north	correct_old	104-north	1991	10	3	GIT-north	1	1	0	middle	F	15450	7	5	48	0.350900466312912
north	correct_old	104-north	1991	10	3	XER-north	1	1	1	low	F	7780	7	5	48	0.350900466312912
north	correct_old	104-north	1991	10	3	OND-north	1	1	0	high	F	13624	7	5	48	0.350900466312912
north	correct_old	104-north	1991	10	3	HER-north	0	1	1	high	F	9606	7	5	48	0.350900466312912
north	correct_old	104-north	1991	10	3	MYS-north	0	1	1	high	F	5954	7	5	48	0.350900466312912
north	correct_old	104-north	1991	10	3	RIC-north	0	1	0	high	F	10337	7	5	48	0.350900466312912
north	correct_old	104-north	1991	10	3	FIT-north	0	1	0	NA	M	5954	7	5	48	0.350900466312912
north	correct_old	104-north	1991	10	3	ROU-north	0	1	0	NA	M	9241	7	5	48	0.350900466312912
north	correct_old	105-north	1991	10	5	BRU-north	0	1	0	NA	M	14722	3	4	48	0.350900466312912
north	correct_old	105-north	1991	10	5	FIT-north	0	0	0	NA	M	5956	3	4	48	0.350900466312912
north	correct_old	105-north	1991	10	5	OND-north	1	0	0	high	F	13626	3	4	48	0.350900466312912
north	correct_old	105-north	1991	10	5	ALI-north	0	1	0	NA	M	4495	3	4	48	0.350900466312912
north	correct_old	105-north	1991	10	5	GER-north	0	1	0	NA	M	3034	3	4	48	0.350900466312912
north	correct_old	105-north	1991	10	5	GIT-north	1	1	0	middle	F	15452	3	4	48	0.350900466312912
north	correct_old	105-north	1991	10	5	SAR-north	0	0	0	NA	M	4129	3	4	48	0.350900466312912
north	correct_old	105-north	1991	10	5	DAR-north	0	1	0	NA	M	8147	3	4	48	0.350900466312912
north	correct_old	105-north	1991	10	5	ROU-north	0	1	0	NA	M	9243	3	4	48	0.350900466312912
north	correct_old	105-north	1991	10	5	SIR-north	0	0	0	NA	F	1420	3	4	48	0.350900466312912
north	correct_old	105-north	1991	10	5	GAL-north	1	0	0	middle	F	9973	3	4	48	0.350900466312912
north	correct_old	105-north	1991	10	5	GIP-north	0	0	0	NA	M	4007	3	4	48	0.350900466312912
north	correct_old	105-north	1991	10	5	GOY-north	0	1	0	NA	F	2273	3	4	48	0.350900466312912
north	correct_old	106-north	1991	10	5	BRU-north	0	0	0	NA	M	14722	3	4	48	0.350900466312912
north	correct_old	106-north	1991	10	5	FIT-north	0	1	0	NA	M	5956	3	4	48	0.350900466312912
north	correct_old	106-north	1991	10	5	OND-north	1	1	0	high	F	13626	3	4	48	0.350900466312912
north	correct_old	106-north	1991	10	5	ALI-north	0	1	0	NA	M	4495	3	4	48	0.350900466312912
north	correct_old	106-north	1991	10	5	GER-north	0	1	0	NA	M	3034	3	4	48	0.350900466312912
north	correct_old	106-north	1991	10	5	GIT-north	1	1	0	middle	F	15452	3	4	48	0.350900466312912
north	correct_old	106-north	1991	10	5	SAR-north	0	0	0	NA	M	4129	3	4	48	0.350900466312912
north	correct_old	106-north	1991	10	5	DAR-north	0	0	0	NA	M	8147	3	4	48	0.350900466312912
north	correct_old	106-north	1991	10	5	ROU-north	0	0	0	NA	M	9243	3	4	48	0.350900466312912
north	correct_old	106-north	1991	10	5	SIR-north	0	0	0	NA	F	1420	3	4	48	0.350900466312912
north	correct_old	106-north	1991	10	5	GAL-north	1	0	0	middle	F	9973	3	4	48	0.350900466312912
north	correct_old	106-north	1991	10	5	GIP-north	0	1	0	NA	M	4007	3	4	48	0.350900466312912
north	correct_old	106-north	1991	10	5	GOY-north	0	1	0	NA	F	2273	3	4	48	0.350900466312912
north	correct_old	107-north	1991	10	11	FAN-north	0	1	0	high	F	8153	1	3	48	0.350900466312912
north	correct_old	107-north	1991	10	11	MAC-north	0	0	0	NA	M	9979	1	3	48	0.350900466312912
north	correct_old	107-north	1991	10	11	ROU-north	0	0	0	NA	M	9249	1	3	48	0.350900466312912
north	correct_old	107-north	1991	10	11	FIT-north	0	0	0	NA	M	5962	1	3	48	0.350900466312912
north	correct_old	107-north	1991	10	11	GER-north	0	0	0	NA	M	3040	1	3	48	0.350900466312912
north	correct_old	107-north	1991	10	11	SAR-north	0	0	0	NA	M	4135	1	3	48	0.350900466312912
north	correct_old	108-north	1991	10	15	DAR-north	0	1	0	NA	M	8157	6	4	48	0.350900466312912
north	correct_old	108-north	1991	10	15	GIP-north	0	0	0	NA	M	4017	6	4	48	0.350900466312912
north	correct_old	108-north	1991	10	15	AGA-north	0	1	0	low	F	5235	6	4	48	0.350900466312912
north	correct_old	108-north	1991	10	15	GER-north	0	1	0	NA	M	3044	6	4	48	0.350900466312912
north	correct_old	108-north	1991	10	15	FIT-north	0	1	0	NA	M	5966	6	4	48	0.350900466312912
north	correct_old	108-north	1991	10	15	MAR-north	0	0	0	NA	M	3470	6	4	48	0.350900466312912
north	correct_old	108-north	1991	10	15	MAC-north	0	1	0	NA	M	9983	6	4	48	0.350900466312912
north	correct_old	108-north	1991	10	15	DIL-north	0	1	0	low	F	4870	6	4	48	0.350900466312912
north	correct_old	108-north	1991	10	15	PER-north	0	1	1	low	F	5600	6	4	48	0.350900466312912
north	correct_old	108-north	1991	10	15	OND-north	0	1	0	high	F	13636	6	4	48	0.350900466312912
north	correct_old	108-north	1991	10	15	CAS-north	0	0	1	low	F	5600	6	4	48	0.350900466312912
north	correct_old	108-north	1991	10	15	SIR-north	0	1	0	NA	F	1430	6	4	48	0.350900466312912
north	correct_old	108-north	1991	10	15	XER-north	0	1	1	low	F	7792	6	4	48	0.350900466312912
north	correct_old	108-north	1991	10	15	CHO-north	0	0	0	NA	F	3866	6	4	48	0.350900466312912
north	correct_old	108-north	1991	10	15	ROU-north	0	1	0	NA	M	9253	6	4	48	0.350900466312912
north	correct_old	109-north	1991	10	16	DAR-north	0	0	0	NA	M	8158	4	5	48	0.350900466312912
north	correct_old	109-north	1991	10	16	VEN-north	1	0	1	middle	F	4871	4	5	48	0.350900466312912
north	correct_old	109-north	1991	10	16	BRU-north	0	0	0	NA	M	14733	4	5	48	0.350900466312912
north	correct_old	109-north	1991	10	16	ROU-north	0	1	0	NA	M	9254	4	5	48	0.350900466312912
north	correct_old	109-north	1991	10	16	MAR-north	0	0	0	NA	M	3471	4	5	48	0.350900466312912
north	correct_old	109-north	1991	10	16	GIP-north	0	0	0	NA	M	4018	4	5	48	0.350900466312912
north	correct_old	109-north	1991	10	16	MAC-north	0	0	0	NA	M	9984	4	5	48	0.350900466312912
north	correct_old	109-north	1991	10	16	RIC-north	0	0	0	high	F	10350	4	5	48	0.350900466312912
north	correct_old	109-north	1991	10	16	FIT-north	0	0	0	NA	M	5967	4	5	48	0.350900466312912
north	correct_old	109-north	1991	10	16	GAL-north	0	0	0	middle	F	9984	4	5	48	0.350900466312912
north	correct_old	109-north	1991	10	16	FOS-north	0	0	0	NA	F	4506	4	5	48	0.350900466312912
north	correct_old	109-north	1991	10	16	CAS-north	0	0	1	low	F	5601	4	5	48	0.350900466312912
north	correct_old	110-north	1991	10	17	FIT-north	0	1	0	NA	M	5968	6	4	48	0.350900466312912
north	correct_old	110-north	1991	10	17	MAR-north	0	1	0	NA	M	3472	6	4	48	0.350900466312912
north	correct_old	110-north	1991	10	17	GER-north	0	0	0	NA	M	3046	6	4	48	0.350900466312912
north	correct_old	110-north	1991	10	17	VEN-north	1	1	1	middle	F	4872	6	4	48	0.350900466312912
north	correct_old	110-north	1991	10	17	MAC-north	0	1	0	NA	M	9985	6	4	48	0.350900466312912
north	correct_old	110-north	1991	10	17	DAR-north	0	0	0	NA	M	8159	6	4	48	0.350900466312912
north	correct_old	110-north	1991	10	17	BRU-north	0	0	0	NA	M	14734	6	4	48	0.350900466312912
north	correct_old	110-north	1991	10	17	OND-north	0	1	0	high	F	13638	6	4	48	0.350900466312912
north	correct_old	110-north	1991	10	17	RIC-north	0	1	0	high	F	10351	6	4	48	0.350900466312912
north	correct_old	110-north	1991	10	17	XER-north	0	1	1	low	F	7794	6	4	48	0.350900466312912
north	correct_old	110-north	1991	10	17	GAL-north	0	0	0	middle	F	9985	6	4	48	0.350900466312912
north	correct_old	110-north	1991	10	17	SIR-north	0	1	0	NA	F	1432	6	4	48	0.350900466312912
north	correct_old	110-north	1991	10	17	AGA-north	0	1	0	low	F	5237	6	4	48	0.350900466312912
north	correct_old	110-north	1991	10	17	FOS-north	0	1	0	NA	F	4507	6	4	48	0.350900466312912
north	correct_old	110-north	1991	10	17	NIN-north	0	0	0	NA	M	1324	6	4	48	0.350900466312912
north	correct_old	110-north	1991	10	17	XIN-north	0	0	0	NA	F	2619	6	4	48	0.350900466312912
north	correct_old	111-north	1991	10	17	FIT-north	0	1	0	NA	M	5968	9	4	48	0.350900466312912
north	correct_old	111-north	1991	10	17	MAR-north	0	0	0	NA	M	3472	9	4	48	0.350900466312912
north	correct_old	111-north	1991	10	17	DAR-north	0	1	0	NA	M	8159	9	4	48	0.350900466312912
north	correct_old	111-north	1991	10	17	GER-north	0	1	0	NA	M	3046	9	4	48	0.350900466312912
north	correct_old	111-north	1991	10	17	RIC-north	0	0	0	high	F	10351	9	4	48	0.350900466312912
north	correct_old	111-north	1991	10	17	GAL-north	0	1	0	middle	F	9985	9	4	48	0.350900466312912
north	correct_old	111-north	1991	10	17	NIN-north	0	0	0	NA	M	1324	9	4	48	0.350900466312912
north	correct_old	111-north	1991	10	17	OND-north	0	1	0	high	F	13638	9	4	48	0.350900466312912
north	correct_old	111-north	1991	10	17	VEN-north	1	1	1	middle	F	4872	9	4	48	0.350900466312912
north	correct_old	111-north	1991	10	17	MAC-north	0	1	0	NA	M	9985	9	4	48	0.350900466312912
north	correct_old	111-north	1991	10	17	SAR-north	0	1	0	NA	M	4141	9	4	48	0.350900466312912
north	correct_old	111-north	1991	10	17	FOS-north	0	1	0	NA	F	4507	9	4	48	0.350900466312912
north	correct_old	111-north	1991	10	17	PER-north	0	0	1	low	F	5602	9	4	48	0.350900466312912
north	correct_old	111-north	1991	10	17	POU-north	0	0	1	high	F	6698	9	4	48	0.350900466312912
north	correct_old	111-north	1991	10	17	MYS-north	0	1	1	high	F	5968	9	4	48	0.350900466312912
north	correct_old	111-north	1991	10	17	HER-north	0	0	1	high	F	9620	9	4	48	0.350900466312912
north	correct_old	111-north	1991	10	17	BIJ-north	0	1	0	middle	F	5968	9	4	48	0.350900466312912
north	correct_old	111-north	1991	10	17	BRU-north	0	1	0	NA	M	14734	9	4	48	0.350900466312912
north	correct_old	111-north	1991	10	17	SIR-north	0	1	0	NA	F	1432	9	4	48	0.350900466312912
north	correct_old	112-north	1991	10	20	FIT-north	0	1	0	NA	M	5971	9	4	48	0.350900466312912
north	correct_old	112-north	1991	10	20	MAC-north	0	1	0	NA	M	9988	9	4	48	0.350900466312912
north	correct_old	112-north	1991	10	20	BIJ-north	0	1	0	middle	F	5971	9	4	48	0.350900466312912
north	correct_old	112-north	1991	10	20	MYS-north	0	1	1	high	F	5971	9	4	48	0.350900466312912
north	correct_old	112-north	1991	10	20	MAR-north	0	1	0	NA	M	3475	9	4	48	0.350900466312912
north	correct_old	112-north	1991	10	20	DAR-north	0	1	0	NA	M	8162	9	4	48	0.350900466312912
north	correct_old	112-north	1991	10	20	BRU-north	0	1	0	NA	M	14737	9	4	48	0.350900466312912
north	correct_old	112-north	1991	10	20	OND-north	0	1	0	high	F	13641	9	4	48	0.350900466312912
north	correct_old	112-north	1991	10	20	FOS-north	0	1	0	NA	F	4510	9	4	48	0.350900466312912
north	correct_old	112-north	1991	10	20	AGA-north	0	1	0	low	F	5240	9	4	48	0.350900466312912
north	correct_old	112-north	1991	10	20	VEN-north	1	1	1	middle	F	4875	9	4	48	0.350900466312912
north	correct_old	112-north	1991	10	20	HER-north	0	1	1	high	F	9623	9	4	48	0.350900466312912
north	correct_old	112-north	1991	10	20	XER-north	0	1	1	low	F	7797	9	4	48	0.350900466312912
north	correct_old	112-north	1991	10	20	PER-north	1	0	1	low	F	5605	9	4	48	0.350900466312912
north	correct_old	112-north	1991	10	20	GAL-north	0	1	0	middle	F	9988	9	4	48	0.350900466312912
north	correct_old	112-north	1991	10	20	SIR-north	0	1	0	NA	F	1435	9	4	48	0.350900466312912
north	correct_old	112-north	1991	10	20	GER-north	0	1	0	NA	M	3049	9	4	48	0.350900466312912
north	correct_old	112-north	1991	10	20	SAR-north	0	0	0	NA	M	4144	9	4	48	0.350900466312912
north	correct_old	112-north	1991	10	20	GIP-north	0	0	0	NA	M	4022	9	4	48	0.350900466312912
north	correct_old	113-north	1991	10	22	MAR-north	0	1	0	NA	M	3477	7	4	48	0.350900466312912
north	correct_old	113-north	1991	10	22	MAC-north	0	1	0	NA	M	9990	7	4	48	0.350900466312912
north	correct_old	113-north	1991	10	22	ROU-north	0	1	0	NA	M	9260	7	4	48	0.350900466312912
north	correct_old	113-north	1991	10	22	DAR-north	0	1	0	NA	M	8164	7	4	48	0.350900466312912
north	correct_old	113-north	1991	10	22	ALI-north	0	0	0	NA	M	4512	7	4	48	0.350900466312912
north	correct_old	113-north	1991	10	22	GAL-north	0	0	0	middle	F	9990	7	4	48	0.350900466312912
north	correct_old	113-north	1991	10	22	BIJ-north	1	1	0	middle	F	5973	7	4	48	0.350900466312912
north	correct_old	113-north	1991	10	22	FIT-north	0	1	0	NA	M	5973	7	4	48	0.350900466312912
north	correct_old	113-north	1991	10	22	GER-north	0	1	0	NA	M	3051	7	4	48	0.350900466312912
north	correct_old	113-north	1991	10	22	VEN-north	1	0	1	middle	F	4877	7	4	48	0.350900466312912
north	correct_old	113-north	1991	10	22	XER-north	0	0	1	low	F	7799	7	4	48	0.350900466312912
north	correct_old	113-north	1991	10	22	PER-north	1	1	1	low	F	5607	7	4	48	0.350900466312912
north	correct_old	113-north	1991	10	22	DIL-north	0	1	0	low	F	4877	7	4	48	0.350900466312912
north	correct_old	113-north	1991	10	22	CAS-north	0	0	1	low	F	5607	7	4	48	0.350900466312912
north	correct_old	114-north	1991	11	4	SAR-north	0	0	0	NA	M	4159	3	6	50	0.357476350939873
north	correct_old	114-north	1991	11	4	DAR-north	0	1	0	NA	M	8177	3	6	50	0.357476350939873
north	correct_old	114-north	1991	11	4	MAC-north	0	0	0	NA	M	10003	3	6	50	0.357476350939873
north	correct_old	114-north	1991	11	4	KEN-north	0	0	0	NA	M	8177	3	6	50	0.357476350939873
north	correct_old	114-north	1991	11	4	ROU-north	0	1	0	NA	M	9273	3	6	50	0.357476350939873
north	correct_old	114-north	1991	11	4	BRU-north	0	1	0	NA	M	14752	3	6	50	0.357476350939873
north	correct_old	114-north	1991	11	4	FIT-north	0	0	0	NA	M	5986	3	6	50	0.357476350939873
north	correct_old	114-north	1991	11	4	FAN-north	0	0	0	high	F	8177	3	6	50	0.357476350939873
north	correct_old	114-north	1991	11	4	RIC-north	0	0	0	high	F	10369	3	6	50	0.357476350939873
north	correct_old	114-north	1991	11	4	MAR-north	0	0	0	NA	M	3490	3	6	50	0.357476350939873
north	correct_old	114-north	1991	11	4	FOS-north	0	0	0	NA	F	4525	3	6	50	0.357476350939873
north	correct_old	114-north	1991	11	4	GOY-north	0	0	0	NA	F	2303	3	6	50	0.357476350939873
north	correct_old	114-north	1991	11	4	GIT-north	1	0	0	middle	F	15482	3	6	50	0.357476350939873
north	correct_old	114-north	1991	11	4	ALI-north	0	0	0	NA	M	4525	3	6	50	0.357476350939873
north	correct_old	115-north	1991	11	14	BRU-north	0	1	0	NA	M	14762	0	1	50	0.357476350939873
north	correct_old	116-north	1991	11	23	HER-north	0	1	1	high	F	9657	4	2	50	0.357476350939873
north	correct_old	116-north	1991	11	23	BRU-north	0	1	0	NA	M	14771	4	2	50	0.357476350939873
north	correct_old	116-north	1991	11	23	DAR-north	0	1	0	NA	M	8196	4	2	50	0.357476350939873
north	correct_old	116-north	1991	11	23	LOU-north	0	1	1	high	F	7100	4	2	50	0.357476350939873
north	correct_old	116-north	1991	11	23	POU-north	0	1	1	high	F	6735	4	2	50	0.357476350939873
north	correct_old	116-north	1991	11	23	ALI-north	0	1	0	NA	M	4544	4	2	50	0.357476350939873
north	correct_old	116-north	1991	11	23	OND-north	1	1	0	high	F	13675	4	2	50	0.357476350939873
north	correct_old	117-north	1991	12	3	ALI-north	0	1	0	NA	M	4554	3	4	50	0.327869520897044
north	correct_old	117-north	1991	12	3	BRU-north	0	1	0	NA	M	14781	3	4	50	0.327869520897044
north	correct_old	117-north	1991	12	3	DAR-north	0	1	0	NA	M	8206	3	4	50	0.327869520897044
north	correct_old	117-north	1991	12	3	FIT-north	0	1	0	NA	M	6015	3	4	50	0.327869520897044
north	correct_old	117-north	1991	12	3	POU-north	0	1	1	high	F	6745	3	4	50	0.327869520897044
north	correct_old	117-north	1991	12	3	KIR-north	0	1	0	middle	F	8206	3	4	50	0.327869520897044
north	correct_old	117-north	1991	12	3	BIJ-north	0	0	0	middle	F	6015	3	4	50	0.327869520897044
north	correct_old	117-north	1991	12	3	SAR-north	0	0	0	NA	M	4188	3	4	50	0.327869520897044
north	correct_old	117-north	1991	12	3	GER-north	0	0	0	NA	M	3093	3	4	50	0.327869520897044
north	correct_old	117-north	1991	12	3	KEN-north	0	0	0	NA	M	8206	3	4	50	0.327869520897044
north	correct_old	118-north	1991	12	12	DAR-north	0	1	0	NA	M	8215	1	4	50	0.327869520897044
north	correct_old	118-north	1991	12	12	ALI-north	0	0	0	NA	M	4563	1	4	50	0.327869520897044
north	correct_old	118-north	1991	12	12	FIT-north	0	0	0	NA	M	6024	1	4	50	0.327869520897044
north	correct_old	118-north	1991	12	12	BRU-north	0	0	0	NA	M	14790	1	4	50	0.327869520897044
north	correct_old	118-north	1991	12	12	ROU-north	0	1	0	NA	M	9311	1	4	50	0.327869520897044
north	correct_old	118-north	1991	12	12	GIT-north	1	0	0	middle	F	15520	1	4	50	0.327869520897044
north	correct_old	118-north	1991	12	12	GOY-north	0	0	0	NA	F	2341	1	4	50	0.327869520897044
north	correct_old	118-north	1991	12	12	GER-north	0	0	0	NA	M	3102	1	4	50	0.327869520897044
north	correct_old	118-north	1991	12	12	SAR-north	0	0	0	NA	M	4197	1	4	50	0.327869520897044
north	correct_old	119-north	1991	12	28	KEN-north	0	1	0	NA	M	8231	0	1	50	0.327869520897044
north	correct_old	120-north	1992	2	19	SAR-north	0	0	0	NA	M	4266	7	1	52	0.215303405428131
north	correct_old	120-north	1992	2	19	ALI-north	0	0	0	NA	M	4632	7	1	52	0.215303405428131
north	correct_old	120-north	1992	2	19	BRU-north	0	1	0	NA	M	14859	7	1	52	0.215303405428131
north	correct_old	120-north	1992	2	19	GER-north	0	0	0	NA	M	3171	7	1	52	0.215303405428131
north	correct_old	120-north	1992	2	19	POU-north	0	0	1	high	F	6823	7	1	52	0.215303405428131
north	correct_old	120-north	1992	2	19	OND-north	0	1	0	high	F	13763	7	1	52	0.215303405428131
north	correct_old	120-north	1992	2	19	HER-north	0	0	1	high	F	9745	7	1	52	0.215303405428131
north	correct_old	120-north	1992	2	19	BIJ-north	0	0	0	middle	F	6093	7	1	52	0.215303405428131
north	correct_old	120-north	1992	2	19	MYS-north	0	0	1	high	F	6093	7	1	52	0.215303405428131
north	correct_old	120-north	1992	2	19	XER-north	0	0	1	low	F	7919	7	1	52	0.215303405428131
north	correct_old	120-north	1992	2	19	VEN-north	0	0	1	middle	F	4997	7	1	52	0.215303405428131
north	correct_old	120-north	1992	2	19	XIN-north	0	0	0	NA	F	2744	7	1	52	0.215303405428131
north	correct_old	121-north	1992	3	16	GOM-north	0	1	0	middle	F	6849	4	0	50	0.162569498690438
north	correct_old	121-north	1992	3	16	POU-north	0	1	1	high	F	6849	4	0	50	0.162569498690438
north	correct_old	121-north	1992	3	16	BIJ-north	0	1	0	middle	F	6119	4	0	50	0.162569498690438
north	correct_old	121-north	1992	3	16	GOS-north	0	1	0	NA	F	2198	4	0	50	0.162569498690438
north	correct_old	121-north	1992	3	16	MYS-north	0	1	1	high	F	6119	4	0	50	0.162569498690438
north	correct_old	121-north	1992	3	16	MOG-north	0	1	0	NA	F	594	4	0	50	0.162569498690438
north	correct_old	121-north	1992	3	16	PIM-north	0	1	0	NA	F	398	4	0	50	0.162569498690438
north	correct_old	122-north	1992	3	24	FIT-north	0	0	0	NA	M	6127	3	5	50	0.162569498690438
north	correct_old	122-north	1992	3	24	SAR-north	0	0	0	NA	M	4300	3	5	50	0.162569498690438
north	correct_old	122-north	1992	3	24	ROU-north	0	1	0	NA	M	9414	3	5	50	0.162569498690438
north	correct_old	122-north	1992	3	24	KEN-north	0	1	0	NA	M	8318	3	5	50	0.162569498690438
north	correct_old	122-north	1992	3	24	OND-north	1	1	0	high	F	13797	3	5	50	0.162569498690438
north	correct_old	122-north	1992	3	24	MAC-north	0	1	0	NA	M	10144	3	5	50	0.162569498690438
north	correct_old	122-north	1992	3	24	ALI-north	0	1	0	NA	M	4666	3	5	50	0.162569498690438
north	correct_old	122-north	1992	3	24	RIC-north	0	0	0	high	F	10510	3	5	50	0.162569498690438
north	correct_old	122-north	1992	3	24	BRU-north	0	0	0	NA	M	14893	3	5	50	0.162569498690438
north	correct_old	122-north	1992	3	24	GER-north	0	0	0	NA	M	3205	3	5	50	0.162569498690438
north	correct_old	122-north	1992	3	24	LOU-north	0	1	1	high	F	7222	3	5	50	0.162569498690438
north	correct_old	122-north	1992	3	24	LYC-north	0	0	0	NA	F	2215	3	5	50	0.162569498690438
north	correct_old	123-north	1992	3	25	ALI-north	0	1	0	NA	M	4667	1	4	50	0.162569498690438
north	correct_old	123-north	1992	3	25	FIT-north	0	1	0	NA	M	6128	1	4	50	0.162569498690438
north	correct_old	123-north	1992	3	25	DAR-north	0	1	0	NA	M	8319	1	4	50	0.162569498690438
north	correct_old	123-north	1992	3	25	GER-north	0	0	0	NA	M	3206	1	4	50	0.162569498690438
north	correct_old	123-north	1992	3	25	KEN-north	0	0	0	NA	M	8319	1	4	50	0.162569498690438
north	correct_old	123-north	1992	3	25	MAC-north	0	0	0	NA	M	10145	1	4	50	0.162569498690438
north	correct_old	123-north	1992	3	25	MAR-north	0	0	0	NA	M	3632	1	4	50	0.162569498690438
north	correct_old	123-north	1992	3	25	RIC-north	0	0	0	high	F	10511	1	4	50	0.162569498690438
north	correct_old	124-north	1992	5	20	BRU-north	0	1	0	NA	M	14950	1	4	51	0.194730284712288
north	correct_old	124-north	1992	5	20	ROU-north	0	0	0	NA	M	9471	1	4	51	0.194730284712288
north	correct_old	124-north	1992	5	20	ALI-north	0	0	0	NA	M	4723	1	4	51	0.194730284712288
north	correct_old	124-north	1992	5	20	GOM-north	0	0	0	middle	F	6914	1	4	51	0.194730284712288
north	correct_old	124-north	1992	5	20	GOS-north	0	0	0	NA	F	2263	1	4	51	0.194730284712288
north	correct_old	124-north	1992	5	20	MAC-north	0	1	0	NA	M	10201	1	4	51	0.194730284712288
north	correct_old	124-north	1992	5	20	FIT-north	0	0	0	NA	M	6184	1	4	51	0.194730284712288
north	correct_old	124-north	1992	5	20	SAR-north	0	0	0	NA	M	4357	1	4	51	0.194730284712288
north	correct_old	124-north	1992	5	20	GER-north	0	0	0	NA	M	3262	1	4	51	0.194730284712288
north	correct_old	125-north	1992	6	17	GOS-north	0	1	0	NA	F	2291	1	1	50	0.240790370202135
north	correct_old	125-north	1992	6	17	GOM-north	0	1	0	middle	F	6942	1	1	50	0.240790370202135
north	correct_old	125-north	1992	6	17	ALI-north	0	1	0	NA	M	4751	1	1	50	0.240790370202135
north	correct_old	125-north	1992	6	17	BRU-north	0	1	0	NA	M	14978	1	1	50	0.240790370202135
north	correct_old	126-north	1992	6	19	FIT-north	0	1	0	NA	M	6214	0	3	50	0.240790370202135
north	correct_old	126-north	1992	6	19	DAR-north	0	1	0	NA	M	8405	0	3	50	0.240790370202135
north	correct_old	126-north	1992	6	19	MAC-north	0	1	0	NA	M	10231	0	3	50	0.240790370202135
north	correct_old	127-north	1992	8	12	BRU-north	0	1	0	NA	M	15034	1	1	48	0.242119847592657
north	correct_old	127-north	1992	8	12	BIJ-north	0	1	1	middle	F	6268	1	1	48	0.242119847592657
north	correct_old	128-north	1992	9	4	MAC-north	0	0	0	NA	M	10308	11	5	48	0.285023355793477
north	correct_old	128-north	1992	9	4	BRU-north	0	1	0	NA	M	15057	11	5	48	0.285023355793477
north	correct_old	128-north	1992	9	4	BIJ-north	0	1	1	middle	F	6291	11	5	48	0.285023355793477
north	correct_old	128-north	1992	9	4	ROU-north	0	1	0	NA	M	9578	11	5	48	0.285023355793477
north	correct_old	128-north	1992	9	4	KEN-north	0	1	0	NA	M	8482	11	5	48	0.285023355793477
north	correct_old	128-north	1992	9	4	GIT-north	1	1	0	middle	F	15787	11	5	48	0.285023355793477
north	correct_old	128-north	1992	9	4	DAR-north	0	1	0	NA	M	8482	11	5	48	0.285023355793477
north	correct_old	128-north	1992	9	4	POU-north	0	1	1	high	F	7021	11	5	48	0.285023355793477
north	correct_old	128-north	1992	9	4	MYS-north	0	0	0	high	F	6291	11	5	48	0.285023355793477
north	correct_old	128-north	1992	9	4	VEN-north	0	0	1	middle	F	5195	11	5	48	0.285023355793477
north	correct_old	128-north	1992	9	4	GER-north	0	0	0	NA	M	3369	11	5	48	0.285023355793477
north	correct_old	128-north	1992	9	4	ALI-north	0	0	0	NA	M	4830	11	5	48	0.285023355793477
north	correct_old	128-north	1992	9	4	AGA-north	0	1	1	low	F	5560	11	5	48	0.285023355793477
north	correct_old	128-north	1992	9	4	DIL-north	1	0	1	low	F	5195	11	5	48	0.285023355793477
north	correct_old	128-north	1992	9	4	HER-north	0	0	1	high	F	9943	11	5	48	0.285023355793477
north	correct_old	128-north	1992	9	4	GOY-north	0	0	0	NA	F	2608	11	5	48	0.285023355793477
north	correct_old	128-north	1992	9	4	BEL-north	0	0	0	middle	F	6046	11	5	48	0.285023355793477
north	correct_old	128-north	1992	9	4	FOS-north	0	0	1	low	F	4830	11	5	48	0.285023355793477
north	correct_old	128-north	1992	9	4	KAN-north	0	0	0	NA	F	1918	11	5	48	0.285023355793477
north	correct_old	128-north	1992	9	4	SAR-north	0	0	0	NA	M	4464	11	5	48	0.285023355793477
north	correct_old	128-north	1992	9	4	MAR-north	0	0	0	NA	M	3795	11	5	48	0.285023355793477
north	correct_old	128-north	1992	9	4	GIP-north	0	0	0	NA	M	4342	11	5	48	0.285023355793477
north	correct_old	128-north	1992	9	4	GOM-north	0	1	0	middle	F	7021	11	5	48	0.285023355793477
north	correct_old	129-north	1992	9	10	FIT-north	0	1	0	NA	M	6297	8	6	48	0.285023355793477
north	correct_old	129-north	1992	9	10	ALI-north	0	0	0	NA	M	4836	8	6	48	0.285023355793477
north	correct_old	129-north	1992	9	10	KEN-north	0	1	0	NA	M	8488	8	6	48	0.285023355793477
north	correct_old	129-north	1992	9	10	GIT-north	1	1	0	middle	F	15793	8	6	48	0.285023355793477
north	correct_old	129-north	1992	9	10	GOY-north	0	1	0	NA	F	2614	8	6	48	0.285023355793477
north	correct_old	129-north	1992	9	10	GIP-north	0	0	0	NA	M	4348	8	6	48	0.285023355793477
north	correct_old	129-north	1992	9	10	HER-north	0	1	1	high	F	9949	8	6	48	0.285023355793477
north	correct_old	129-north	1992	9	10	KAN-north	0	0	0	NA	F	1924	8	6	48	0.285023355793477
north	correct_old	129-north	1992	9	10	BIJ-north	0	1	1	middle	F	6297	8	6	48	0.285023355793477
north	correct_old	129-north	1992	9	10	LOU-north	0	1	1	high	F	7392	8	6	48	0.285023355793477
north	correct_old	129-north	1992	9	10	ROU-north	0	1	0	NA	M	9584	8	6	48	0.285023355793477
north	correct_old	129-north	1992	9	10	DAR-north	0	1	0	NA	M	8488	8	6	48	0.285023355793477
north	correct_old	129-north	1992	9	10	MAC-north	0	1	0	NA	M	10314	8	6	48	0.285023355793477
north	correct_old	129-north	1992	9	10	BRU-north	0	1	0	NA	M	15063	8	6	48	0.285023355793477
north	correct_old	129-north	1992	9	10	LYC-north	0	1	0	NA	F	2385	8	6	48	0.285023355793477
north	correct_old	129-north	1992	9	10	FOS-north	0	0	1	low	F	4836	8	6	48	0.285023355793477
north	correct_old	129-north	1992	9	10	GER-north	0	0	0	NA	M	3375	8	6	48	0.285023355793477
north	correct_old	129-north	1992	9	10	POU-north	0	1	1	high	F	7027	8	6	48	0.285023355793477
north	correct_old	129-north	1992	9	10	MYS-north	0	0	0	high	F	6297	8	6	48	0.285023355793477
north	correct_old	129-north	1992	9	10	GOM-north	0	1	0	middle	F	7027	8	6	48	0.285023355793477
north	correct_old	130-north	1992	9	11	ALI-north	0	1	0	NA	M	4837	7	6	48	0.285023355793477
north	correct_old	130-north	1992	9	11	BRU-north	0	1	0	NA	M	15064	7	6	48	0.285023355793477
north	correct_old	130-north	1992	9	11	GIP-north	0	0	0	NA	M	4349	7	6	48	0.285023355793477
north	correct_old	130-north	1992	9	11	BIJ-north	0	1	1	middle	F	6298	7	6	48	0.285023355793477
north	correct_old	130-north	1992	9	11	FIT-north	0	1	0	NA	M	6298	7	6	48	0.285023355793477
north	correct_old	130-north	1992	9	11	KEN-north	0	1	0	NA	M	8489	7	6	48	0.285023355793477
north	correct_old	130-north	1992	9	11	DAR-north	0	1	0	NA	M	8489	7	6	48	0.285023355793477
north	correct_old	130-north	1992	9	11	LOU-north	0	1	1	high	F	7393	7	6	48	0.285023355793477
north	correct_old	130-north	1992	9	11	LYC-north	0	0	0	NA	F	2386	7	6	48	0.285023355793477
north	correct_old	130-north	1992	9	11	FOS-north	0	0	1	low	F	4837	7	6	48	0.285023355793477
north	correct_old	130-north	1992	9	11	CHO-north	0	0	0	NA	F	4198	7	6	48	0.285023355793477
north	correct_old	130-north	1992	9	11	ROU-north	0	1	0	NA	M	9585	7	6	48	0.285023355793477
north	correct_old	130-north	1992	9	11	HER-north	0	1	1	high	F	9950	7	6	48	0.285023355793477
north	correct_old	130-north	1992	9	11	POU-north	0	0	1	high	F	7028	7	6	48	0.285023355793477
north	correct_old	130-north	1992	9	11	AGA-north	0	0	1	low	F	5567	7	6	48	0.285023355793477
north	correct_old	130-north	1992	9	11	MAC-north	0	1	0	NA	M	10315	7	6	48	0.285023355793477
north	correct_old	130-north	1992	9	11	MYS-north	0	1	0	high	F	6298	7	6	48	0.285023355793477
north	correct_old	131-north	1992	9	13	SAR-north	0	0	0	NA	M	4473	9	6	48	0.285023355793477
north	correct_old	131-north	1992	9	13	ALI-north	0	0	0	NA	M	4839	9	6	48	0.285023355793477
north	correct_old	131-north	1992	9	13	FIT-north	0	1	0	NA	M	6300	9	6	48	0.285023355793477
north	correct_old	131-north	1992	9	13	ROU-north	0	1	0	NA	M	9587	9	6	48	0.285023355793477
north	correct_old	131-north	1992	9	13	KEN-north	0	1	0	NA	M	8491	9	6	48	0.285023355793477
north	correct_old	131-north	1992	9	13	LOU-north	0	0	1	high	F	7395	9	6	48	0.285023355793477
north	correct_old	131-north	1992	9	13	GAL-north	0	0	0	middle	F	10317	9	6	48	0.285023355793477
north	correct_old	131-north	1992	9	13	BIJ-north	0	1	1	middle	F	6300	9	6	48	0.285023355793477
north	correct_old	131-north	1992	9	13	LYC-north	0	0	0	NA	F	2388	9	6	48	0.285023355793477
north	correct_old	131-north	1992	9	13	BRU-north	0	1	0	NA	M	15066	9	6	48	0.285023355793477
north	correct_old	131-north	1992	9	13	MAC-north	0	1	0	NA	M	10317	9	6	48	0.285023355793477
north	correct_old	131-north	1992	9	13	OND-north	0	1	0	high	F	13970	9	6	48	0.285023355793477
north	correct_old	131-north	1992	9	13	SIR-north	0	1	0	NA	F	1764	9	6	48	0.285023355793477
north	correct_old	131-north	1992	9	13	HER-north	0	1	1	high	F	9952	9	6	48	0.285023355793477
north	correct_old	131-north	1992	9	13	DAR-north	0	1	0	NA	M	8491	9	6	48	0.285023355793477
north	correct_old	131-north	1992	9	13	PER-north	1	0	0	low	F	5934	9	6	48	0.285023355793477
north	correct_old	131-north	1992	9	13	GER-north	0	0	0	NA	M	3378	9	6	48	0.285023355793477
north	correct_old	131-north	1992	9	13	MAR-north	0	0	0	NA	M	3804	9	6	48	0.285023355793477
north	correct_old	131-north	1992	9	13	FAN-north	0	0	0	high	F	8491	9	6	48	0.285023355793477
north	correct_old	131-north	1992	9	13	CHO-north	0	0	0	NA	F	4200	9	6	48	0.285023355793477
north	correct_old	131-north	1992	9	13	FOS-north	0	0	1	low	F	4839	9	6	48	0.285023355793477
north	correct_old	131-north	1992	9	13	GOM-north	0	0	0	middle	F	7030	9	6	48	0.285023355793477
north	correct_old	132-north	1992	9	16	FIT-north	0	0	0	NA	M	6303	6	6	48	0.285023355793477
north	correct_old	132-north	1992	9	16	BRU-north	0	1	0	NA	M	15069	6	6	48	0.285023355793477
north	correct_old	132-north	1992	9	16	BIJ-north	0	1	1	middle	F	6303	6	6	48	0.285023355793477
north	correct_old	132-north	1992	9	16	ROU-north	0	1	0	NA	M	9590	6	6	48	0.285023355793477
north	correct_old	132-north	1992	9	16	KAN-north	0	0	0	NA	F	1930	6	6	48	0.285023355793477
north	correct_old	132-north	1992	9	16	LOU-north	0	1	1	high	F	7398	6	6	48	0.285023355793477
north	correct_old	132-north	1992	9	16	LYC-north	0	1	0	NA	F	2391	6	6	48	0.285023355793477
north	correct_old	132-north	1992	9	16	CHO-north	0	0	0	NA	F	4203	6	6	48	0.285023355793477
north	correct_old	132-north	1992	9	16	DAR-north	0	1	0	NA	M	8494	6	6	48	0.285023355793477
north	correct_old	132-north	1992	9	16	GER-north	0	0	0	NA	M	3381	6	6	48	0.285023355793477
north	correct_old	132-north	1992	9	16	KEN-north	0	1	0	NA	M	8494	6	6	48	0.285023355793477
north	correct_old	132-north	1992	9	16	GOM-north	1	1	0	middle	F	7033	6	6	48	0.285023355793477
north	correct_old	132-north	1992	9	16	MAC-north	0	1	0	NA	M	10320	6	6	48	0.285023355793477
north	correct_old	132-north	1992	9	16	POU-north	0	0	1	high	F	7033	6	6	48	0.285023355793477
north	correct_old	132-north	1992	9	16	GIP-north	0	0	0	NA	M	4354	6	6	48	0.285023355793477
north	correct_old	132-north	1992	9	16	GIT-north	0	1	0	middle	F	15799	6	6	48	0.285023355793477
north	correct_old	132-north	1992	9	16	CAS-north	0	0	1	low	F	5937	6	6	48	0.285023355793477
north	correct_old	133-north	1992	9	20	DAR-north	0	1	0	NA	M	8498	3	5	48	0.285023355793477
north	correct_old	133-north	1992	9	20	ROU-north	0	0	0	NA	M	9594	3	5	48	0.285023355793477
north	correct_old	133-north	1992	9	20	LOU-north	0	1	1	high	F	7402	3	5	48	0.285023355793477
north	correct_old	133-north	1992	9	20	LYC-north	0	0	0	NA	F	2395	3	5	48	0.285023355793477
north	correct_old	133-north	1992	9	20	MAC-north	0	1	0	NA	M	10324	3	5	48	0.285023355793477
north	correct_old	133-north	1992	9	20	SAR-north	0	0	0	NA	M	4480	3	5	48	0.285023355793477
north	correct_old	133-north	1992	9	20	ALI-north	0	1	0	NA	M	4846	3	5	48	0.285023355793477
north	correct_old	133-north	1992	9	20	BRU-north	0	1	0	NA	M	15073	3	5	48	0.285023355793477
north	correct_old	133-north	1992	9	20	BIJ-north	0	0	1	middle	F	6307	3	5	48	0.285023355793477
north	correct_old	133-north	1992	9	20	KEN-north	0	1	0	NA	M	8498	3	5	48	0.285023355793477
north	correct_old	133-north	1992	9	20	POU-north	0	0	1	high	F	7037	3	5	48	0.285023355793477
north	correct_old	134-north	1992	9	26	LOU-north	0	1	1	high	F	7408	2	0	48	0.285023355793477
north	correct_old	134-north	1992	9	26	GOM-north	0	1	1	middle	F	7043	2	0	48	0.285023355793477
north	correct_old	134-north	1992	9	26	LYC-north	0	1	0	NA	F	2401	2	0	48	0.285023355793477
north	correct_old	134-north	1992	9	26	CHO-north	0	1	0	NA	F	4213	2	0	48	0.285023355793477
north	correct_old	134-north	1992	9	26	LEF-north	0	1	0	NA	M	355	2	0	48	0.285023355793477
north	correct_old	135-north	1992	9	29	HER-north	0	0	1	high	F	9968	10	0	48	0.285023355793477
north	correct_old	135-north	1992	9	29	KAN-north	0	0	0	NA	F	1943	10	0	48	0.285023355793477
north	correct_old	135-north	1992	9	29	BEL-north	0	1	0	middle	F	6071	10	0	48	0.285023355793477
north	correct_old	135-north	1992	9	29	LOU-north	0	0	1	high	F	7411	10	0	48	0.285023355793477
north	correct_old	135-north	1992	9	29	GOM-north	0	0	1	middle	F	7046	10	0	48	0.285023355793477
north	correct_old	135-north	1992	9	29	CHO-north	0	0	0	NA	F	4216	10	0	48	0.285023355793477
north	correct_old	135-north	1992	9	29	GIP-north	0	1	0	NA	M	4367	10	0	48	0.285023355793477
north	correct_old	135-north	1992	9	29	GAL-north	1	0	0	middle	F	10333	10	0	48	0.285023355793477
north	correct_old	135-north	1992	9	29	RIC-north	0	0	0	high	F	10699	10	0	48	0.285023355793477
north	correct_old	135-north	1992	9	29	GIT-north	0	1	0	middle	F	15812	10	0	48	0.285023355793477
north	correct_old	135-north	1992	9	29	VEN-north	0	0	1	middle	F	5220	10	0	48	0.285023355793477
north	correct_old	135-north	1992	9	29	PER-north	0	0	0	low	F	5950	10	0	48	0.285023355793477
north	correct_old	135-north	1992	9	29	GOY-north	0	1	0	NA	F	2633	10	0	48	0.285023355793477
north	correct_old	135-north	1992	9	29	AGA-north	0	1	1	low	F	5585	10	0	48	0.285023355793477
north	correct_old	136-north	1992	10	2	FIT-north	0	1	0	NA	M	6319	6	6	49	0.350900466312912
north	correct_old	136-north	1992	10	2	MAR-north	0	0	0	NA	M	3823	6	6	49	0.350900466312912
north	correct_old	136-north	1992	10	2	MAC-north	0	0	0	NA	M	10336	6	6	49	0.350900466312912
north	correct_old	136-north	1992	10	2	AGA-north	0	1	1	low	F	5588	6	6	49	0.350900466312912
north	correct_old	136-north	1992	10	2	GER-north	0	1	0	NA	M	3397	6	6	49	0.350900466312912
north	correct_old	136-north	1992	10	2	ROU-north	0	1	0	NA	M	9606	6	6	49	0.350900466312912
north	correct_old	136-north	1992	10	2	RIC-north	0	1	0	high	F	10702	6	6	49	0.350900466312912
north	correct_old	136-north	1992	10	2	GIT-north	0	1	0	middle	F	15815	6	6	49	0.350900466312912
north	correct_old	136-north	1992	10	2	DAR-north	0	1	0	NA	M	8510	6	6	49	0.350900466312912
north	correct_old	136-north	1992	10	2	BRU-north	0	1	0	NA	M	15085	6	6	49	0.350900466312912
north	correct_old	136-north	1992	10	2	KEN-north	0	0	0	NA	M	8510	6	6	49	0.350900466312912
north	correct_old	136-north	1992	10	2	HER-north	0	1	1	high	F	9971	6	6	49	0.350900466312912
north	correct_old	136-north	1992	10	2	GAL-north	0	0	0	middle	F	10336	6	6	49	0.350900466312912
north	correct_old	136-north	1992	10	2	FAN-north	0	1	1	high	F	8510	6	6	49	0.350900466312912
north	correct_old	136-north	1992	10	2	GOY-north	0	1	0	NA	F	2636	6	6	49	0.350900466312912
north	correct_old	137-north	1992	10	3	PER-north	0	0	0	low	F	5954	13	6	49	0.350900466312912
north	correct_old	137-north	1992	10	3	POU-north	0	0	1	high	F	7050	13	6	49	0.350900466312912
north	correct_old	137-north	1992	10	3	HER-north	0	1	1	high	F	9972	13	6	49	0.350900466312912
north	correct_old	137-north	1992	10	3	MYS-north	0	0	0	high	F	6320	13	6	49	0.350900466312912
north	correct_old	137-north	1992	10	3	BIJ-north	0	1	1	middle	F	6320	13	6	49	0.350900466312912
north	correct_old	137-north	1992	10	3	BRU-north	0	1	0	NA	M	15086	13	6	49	0.350900466312912
north	correct_old	137-north	1992	10	3	ALI-north	0	1	0	NA	M	4859	13	6	49	0.350900466312912
north	correct_old	137-north	1992	10	3	FOS-north	0	1	1	low	F	4859	13	6	49	0.350900466312912
north	correct_old	137-north	1992	10	3	FIT-north	0	0	0	NA	M	6320	13	6	49	0.350900466312912
north	correct_old	137-north	1992	10	3	MAC-north	0	1	0	NA	M	10337	13	6	49	0.350900466312912
north	correct_old	137-north	1992	10	3	MAR-north	0	0	0	NA	M	3824	13	6	49	0.350900466312912
north	correct_old	137-north	1992	10	3	NIN-north	0	0	0	NA	M	1676	13	6	49	0.350900466312912
north	correct_old	137-north	1992	10	3	RIC-north	0	0	0	high	F	10703	13	6	49	0.350900466312912
north	correct_old	137-north	1992	10	3	DIL-north	0	0	1	low	F	5224	13	6	49	0.350900466312912
north	correct_old	137-north	1992	10	3	LOU-north	0	1	1	high	F	7415	13	6	49	0.350900466312912
north	correct_old	137-north	1992	10	3	DAR-north	0	1	0	NA	M	8511	13	6	49	0.350900466312912
north	correct_old	137-north	1992	10	3	GER-north	0	0	0	NA	M	3398	13	6	49	0.350900466312912
north	correct_old	137-north	1992	10	3	SAR-north	0	1	0	NA	M	4493	13	6	49	0.350900466312912
north	correct_old	137-north	1992	10	3	GOM-north	0	0	1	middle	F	7050	13	6	49	0.350900466312912
north	correct_old	137-north	1992	10	3	FAN-north	0	0	1	high	F	8511	13	6	49	0.350900466312912
north	correct_old	137-north	1992	10	3	GIP-north	0	0	0	NA	M	4371	13	6	49	0.350900466312912
north	correct_old	137-north	1992	10	3	GOY-north	0	0	0	NA	F	2637	13	6	49	0.350900466312912
north	correct_old	137-north	1992	10	3	ROU-north	0	1	0	NA	M	9607	13	6	49	0.350900466312912
[truncated: 3,576 more rows]
