# Supplementary material for: Social rank overrides environmental and community fluctuations in determining meat access by female chimpanzees in the Taï National Park, Côte d’Ivoire
Source: PeerJ. 2020 Jan 22;8:e8283. doi: 10.7717/peerj.8283 (PMC6982416; doi:10.7717/peerj.8283)
Supplement: Supplemental Information 6 [file peerj-08-8283-s006.xlsx]

## Sheet: variable presence model
response variable	coded	details
pres.in.party	0 or 1	binary variable, 0 for the individual being not present at the meat-eating event, 1 for the individual being present at the meat-eating event
fixed effect predictor variables
group	could be North or South group	because two habituated chimpanzee groups were observed
estrus	0 or 1	1 if adult female had a maximum swelling: maximum size with no wrinkles and tight appearance, 0 when female did not had a maximum swelling
is.lac	0 or 1	1 if adult female was nursing a small infant (? 2 years old) on the day of the meat-eating event, 0 if she was not nursing a small infant
rank	high, middle, or low	three rank categories (high, middle and low), one category for the female under "FID" should be filled in
age	age in days	age of the individual under "FID"
nfemales	number	number of adult females present at the meat-eating event
nmales	number	number of adult males present at the meat-eating event
communitysize	number	community size for each of the two groups was recorded at monthly intervals and the size recorded closest to the meat-eating event was used
FAI	number	monthly fruit abundance index (FAI) obtained by using the monthly percentage of observed trees presenting ripe fruits eaten by the Taï chimpanzees
random effects preditor variables
EventID	1-south, 2-south … and so on until the last event number 376, similar for North group, 1-north, 2-north …..and so on until the last event number 451	each meat eating event received a continues number and in which group the event was observed
FID	three letter code for individual chimpanzee plus its group such as North or South examples are ZOR-south, PEM-south, OND-north, LOU-north	this is the female ID
other colums
year	years from 1987 till 2014 for North group, years from 1999 till 2014 for South group	year when the meat eating event happend
month	12 months, such as 1,2,3,4,5,6,7,8,9,10,11,12	month when the meat eating event happend
day	max 31 days, 1,2,3,4,5,6,7 …….	day when the meat eating event happend
status	was just for data cleaning, not a variable, was coded like correct_old

## Sheet: variable meat eating model
response variable	coded	details
meat	0 or 1	binary variable, 0 for the individual not eating meat at the meat-eating event, 1 for the individual eating meat at the meat-eating event
fixed effect predictor variables
group	could be North or South group	because two habituated chimpanzee groups were observed
estrus	0 or 1	1 if adult female had a maximum swelling: maximum size with no wrinkles and tight appearance, 0 when female did not had a maximum swelling
is.lac	0 or 1	1 if adult female was nursing a small infant (? 2 years old) on the day of the meat-eating event, 0 if she was not nursing a small infant
rank	high, middle, or low	three rank categories (high, middle and low), one category for the female under "who" should be filled in
age	age in days	age of the individual under "who"
nfemales	number	number of adult females present at the meat-eating event
nmales	number	number of adult males present at the meat-eating event
communitysize	number	community size for each of the two groups was recorded at monthly intervals and the size recorded closest to the meat-eating event was used
FAI	number	monthly fruit abundance index (FAI) obtained by using the monthly percentage of observed trees presenting ripe fruits eaten by the Taï chimpanzees
random effects preditor variables
EventID	1-south, 2-south … and so on until the last event number 376, similar for North group, 1-north, 2-north …..and so on until the last event number 451	each meat eating event received a continues number and in which group the event was observed
who	three letter code for individual chimpanzee plus its group such as North or South examples are ZOR-south, PEM-south, OND-north, LOU-north	this is the female ID
other colums
year	years from 1987 till 2014 for North group, years from 1999 till 2014 for South group	year when the meat eating event happend
month	12 months, such as 1,2,3,4,5,6,7,8,9,10,11,12	month when the meat eating event happend
day	max 31 days, 1,2,3,4,5,6,7 …….	day when the meat eating event happend
status	was just for data cleaning, not a variable, was coded like correct_old
sex	F or M	sex (female or male) of the individual under "who"
